# Supplementary material
Source: MDPI journal article supplement (https://www.mdpi.com/2304-6740/5/4/62)

# checkCIF/PLATON report

You have not supplied any structure factors. As a result the full set of tests cannot be run.

THIS REPORT IS FOR GUIDANCE ONLY. IF USED AS PART OF A REVIEW PROCEDURE FOR PUBLICATION, IT SHOULD NOT REPLACE THE EXPERTISE OF AN EXPERIENCED CRYSTALLOGRAPHIC REFEREE.

No syntax errors found.      CIF dictionary      Interpreting this report

## Datablock: fl206\_a

---

|                        |                                                                       |                                                                       |
|------------------------|-----------------------------------------------------------------------|-----------------------------------------------------------------------|
| Bond precision:        | C-C = 0.0114 Å                                                        | Wavelength=0.71073                                                    |
| Cell:                  | a=21.131(4)                                                           | b=17.391(4)      c=21.069(4)                                          |
|                        | alpha=90                                                              | beta=107.00(3)      gamma=90                                          |
| Temperature:           | 293 K                                                                 |                                                                       |
|                        | Calculated                                                            | Reported                                                              |
| Volume                 | 7404(3)                                                               | 7404(3)                                                               |
| Space group            | C 2/c                                                                 | C 1 2/c 1                                                             |
| Hall group             | -C 2yc                                                                | -C 2yc                                                                |
| Moiety formula         | 2(C63 H54 Fe2 N18),<br>4(B0.40 F1.60), 4(B F4),<br>4(C0.50 H0.75 N0.5 | C63 H54 Fe2 N18, 2(B0.4<br>F0.8), 2(B F4), 2(B0.6<br>F3.2), 2(C0.5 H0 |
| Sum formula            | C130 H114 B8 F32 Fe4 N39                                              | C65 H57 B4 F16 Fe2 N19.50                                             |
| Mr                     | 3140.49                                                               | 1570.24                                                               |
| Dx, g cm <sup>-3</sup> | 1.409                                                                 | 1.409                                                                 |
| Z                      | 2                                                                     | 4                                                                     |
| Mu (mm <sup>-1</sup> ) | 0.486                                                                 | 0.486                                                                 |
| F000                   | 3198.0                                                                | 3198.0                                                                |
| F000'                  | 3202.45                                                               |                                                                       |
| h,k,lmax               | 26,21,26                                                              | 26,21,26                                                              |
| Nref                   | 7678                                                                  | 6995                                                                  |
| Tmin,Tmax              | 0.994,0.995                                                           |                                                                       |
| Tmin'                  | 0.990                                                                 |                                                                       |

Correction method= Not given

Data completeness= 0.911      Theta(max)= 26.499

R(reflections)= 0.1035( 4686)      wR2(reflections)= 0.3220( 6995)

S = 1.096      Npar= 630

---

The following ALERTS were generated. Each ALERT has the format

**test-name\_ALERT\_alert-type\_alert-level.**

Click on the hyperlinks for more details of the test.

---

### Alert level A

PLAT029\_ALERT\_3\_A \_diffrn\_measured\_fraction\_theta\_full value Low . 0.917 Note

**Author Response: 'The MX1 beam line of the Australian Synchrotron is a single circle instrument, leaving gaps in the coverage of the reciprocal space.'**

---

### Alert level C

PLAT084\_ALERT\_3\_C High wR2 Value (i.e. > 0.25) ..... 0.32 Report  
PLAT094\_ALERT\_2\_C Ratio of Maximum / Minimum Residual Density .... 2.47 Report  
PLAT234\_ALERT\_4\_C Large Hirshfeld Difference N3B -- C4B .. 0.23 Ang.  
PLAT234\_ALERT\_4\_C Large Hirshfeld Difference N5A -- C20A .. 0.16 Ang.  
PLAT250\_ALERT\_2\_C Large U3/U1 Ratio for Average U(i,j) Tensor .... 2.2 Note  
PLAT341\_ALERT\_3\_C Low Bond Precision on C-C Bonds ..... 0.01136 Ang.

---

### Alert level G

FORMU01\_ALERT\_1\_G There is a discrepancy between the atom counts in the  
\_chemical\_formula\_sum and \_chemical\_formula\_moiety. This is  
usually due to the moiety formula being in the wrong format.  
Atom count from \_chemical\_formula\_sum: C65 H57 B4 F16 Fe2 N19.5  
Atom count from \_chemical\_formula\_moiety:C64 H55.5 B4 F16 Fe2 N19

PLAT002\_ALERT\_2\_G Number of Distance or Angle Restraints on AtSite 13 Note  
PLAT003\_ALERT\_2\_G Number of Uiso or Uij Restrained non-H Atoms ... 42 Report  
PLAT007\_ALERT\_5\_G Number of Unrefined Donor-H Atoms ..... 4 Report  
PLAT012\_ALERT\_1\_G No \_shelx\_res\_checksum found in CIF ..... Please Check  
PLAT042\_ALERT\_1\_G Calc. and Reported MoietyFormula Strings Differ Please Check  
PLAT045\_ALERT\_1\_G Calculated and Reported Z Differ by a Factor ... 0.50 Check  
PLAT072\_ALERT\_2\_G SHELXL First Parameter in WGHT Unusually Large 0.13 Report  
PLAT083\_ALERT\_2\_G SHELXL Second Parameter in WGHT Unusually Large 69.22 Why ?  
PLAT171\_ALERT\_4\_G The CIF-Embedded .res File Contains EADP Records 1 Report  
PLAT172\_ALERT\_4\_G The CIF-Embedded .res File Contains DFIX Records 2 Report  
PLAT176\_ALERT\_4\_G The CIF-Embedded .res File Contains SADI Records 1 Report  
PLAT177\_ALERT\_4\_G The CIF-Embedded .res File Contains DELU Records 1 Report  
PLAT187\_ALERT\_4\_G The CIF-Embedded .res File Contains RIGU Records 6 Report  
PLAT199\_ALERT\_1\_G Reported \_cell\_measurement\_temperature ..... (K) 293 Check  
PLAT200\_ALERT\_1\_G Reported \_diffrn\_ambient\_temperature ..... (K) 293 Check  
PLAT232\_ALERT\_2\_G Hirshfeld Test Diff (M-X) Fe01 -- N1A .. 5.2 s.u.  
PLAT244\_ALERT\_4\_G Low 'Solvent' Ueq as Compared to Neighbors of B01A Check  
PLAT300\_ALERT\_4\_G Atom Site Occupancy of N1B' is Constrained at 0.5 Check  
PLAT300\_ALERT\_4\_G Atom Site Occupancy of N1B is Constrained at 0.5 Check  
PLAT300\_ALERT\_4\_G Atom Site Occupancy of N2B' is Constrained at 0.5 Check  
PLAT300\_ALERT\_4\_G Atom Site Occupancy of N2B is Constrained at 0.5 Check  
PLAT300\_ALERT\_4\_G Atom Site Occupancy of C1 is Constrained at 0.5 Check  
PLAT300\_ALERT\_4\_G Atom Site Occupancy of C7A' is Constrained at 0.5 Check  
PLAT300\_ALERT\_4\_G Atom Site Occupancy of C1B is Constrained at 0.5 Check  
PLAT300\_ALERT\_4\_G Atom Site Occupancy of C2 is Constrained at 0.5 Check  
PLAT300\_ALERT\_4\_G Atom Site Occupancy of C8A' is Constrained at 0.5 Check  
PLAT300\_ALERT\_4\_G Atom Site Occupancy of C2B is Constrained at 0.5 Check  
PLAT300\_ALERT\_4\_G Atom Site Occupancy of C3 is Constrained at 0.5 Check  
PLAT300\_ALERT\_4\_G Atom Site Occupancy of C9A' is Constrained at 0.5 Check  
PLAT300\_ALERT\_4\_G Atom Site Occupancy of C3B is Constrained at 0.5 Check

[illegible]

|                   |                                             |                   |      |        |
|-------------------|---------------------------------------------|-------------------|------|--------|
| PLAT300_ALERT_4_G | Atom Site Occupancy of C1AA                 | is Constrained at | 0.25 | Check  |
| PLAT300_ALERT_4_G | Atom Site Occupancy of C2AA                 | is Constrained at | 0.25 | Check  |
| PLAT300_ALERT_4_G | Atom Site Occupancy of H2AB                 | is Constrained at | 0.25 | Check  |
| PLAT300_ALERT_4_G | Atom Site Occupancy of H2AC                 | is Constrained at | 0.25 | Check  |
| PLAT300_ALERT_4_G | Atom Site Occupancy of H2AD                 | is Constrained at | 0.25 | Check  |
| PLAT300_ALERT_4_G | Atom Site Occupancy of N01L                 | is Constrained at | 0.25 | Check  |
| PLAT300_ALERT_4_G | Atom Site Occupancy of C4                   | is Constrained at | 0.25 | Check  |
| PLAT300_ALERT_4_G | Atom Site Occupancy of C0AA                 | is Constrained at | 0.25 | Check  |
| PLAT300_ALERT_4_G | Atom Site Occupancy of H4D                  | is Constrained at | 0.25 | Check  |
| PLAT300_ALERT_4_G | Atom Site Occupancy of H4E                  | is Constrained at | 0.25 | Check  |
| PLAT300_ALERT_4_G | Atom Site Occupancy of H4F                  | is Constrained at | 0.25 | Check  |
| PLAT300_ALERT_4_G | Atom Site Occupancy of F00H                 | is Constrained at | 0.8  | Check  |
| PLAT300_ALERT_4_G | Atom Site Occupancy of F00T                 | is Constrained at | 0.8  | Check  |
| PLAT300_ALERT_4_G | Atom Site Occupancy of F00Y                 | is Constrained at | 0.8  | Check  |
| PLAT300_ALERT_4_G | Atom Site Occupancy of B01C                 | is Constrained at | 0.6  | Check  |
| PLAT301_ALERT_3_G | Main Residue Disorder .....                 | (Resd 1) ..       | 46   | % Note |
| PLAT302_ALERT_4_G | Anion/Solvent/Minor-Residue Disorder        | (Resd 2) ..       | 100  | % Note |
| PLAT302_ALERT_4_G | Anion/Solvent/Minor-Residue Disorder        | (Resd 4) ..       | 100  | % Note |
| PLAT302_ALERT_4_G | Anion/Solvent/Minor-Residue Disorder        | (Resd 5) ..       | 100  | % Note |
| PLAT302_ALERT_4_G | Anion/Solvent/Minor-Residue Disorder        | (Resd 6) ..       | 100  | % Note |
| PLAT302_ALERT_4_G | Anion/Solvent/Minor-Residue Disorder        | (Resd 7) ..       | 100  | % Note |
| PLAT302_ALERT_4_G | Anion/Solvent/Minor-Residue Disorder        | (Resd 8) ..       | 100  | % Note |
| PLAT302_ALERT_4_G | Anion/Solvent/Minor-Residue Disorder        | (Resd 9) ..       | 100  | % Note |
| PLAT304_ALERT_4_G | Non-Integer Number of Atoms (               | 1.75) in Resd. #  | 4    | Check  |
| PLAT304_ALERT_4_G | Non-Integer Number of Atoms (               | 1.50) in Resd. #  | 5    | Check  |
| PLAT304_ALERT_4_G | Non-Integer Number of Atoms (               | 0.80) in Resd. #  | 6    | Check  |
| PLAT304_ALERT_4_G | Non-Integer Number of Atoms (               | 0.80) in Resd. #  | 7    | Check  |
| PLAT304_ALERT_4_G | Non-Integer Number of Atoms (               | 0.80) in Resd. #  | 8    | Check  |
| PLAT304_ALERT_4_G | Non-Integer Number of Atoms (               | 0.60) in Resd. #  | 9    | Check  |
| PLAT367_ALERT_2_G | Long? C(sp?)-C(sp?) Bond                    | C8B - C11B ..     | 1.51 | Ang.   |
| PLAT432_ALERT_2_G | Short Inter X...Y Contact                   | F00A .. C0AA ..   | 2.95 | Ang.   |
| PLAT432_ALERT_2_G | Short Inter X...Y Contact                   | F00Y .. C20A ..   | 2.93 | Ang.   |
| PLAT720_ALERT_4_G | Number of Unusual/Non-Standard Labels       | .....             | 40   | Note   |
| PLAT811_ALERT_5_G | No ADDSYM Analysis: Too Many Excluded Atoms | ....              | !    | Info   |
| PLAT860_ALERT_3_G | Number of Least-Squares Restraints          | .....             | 218  | Note   |

---

1 **ALERT level A** = Most likely a serious problem - resolve or explain  
 0 **ALERT level B** = A potentially serious problem, consider carefully  
 6 **ALERT level C** = Check. Ensure it is not caused by an omission or oversight  
 128 **ALERT level G** = General information/check it is not something unexpected

6 ALERT type 1 CIF construction/syntax error, inconsistent or missing data  
 10 ALERT type 2 Indicator that the structure model may be wrong or deficient  
 5 ALERT type 3 Indicator that the structure quality may be low  
 112 ALERT type 4 Improvement, methodology, query or suggestion  
 2 ALERT type 5 Informative message, check

---

It is advisable to attempt to resolve as many as possible of the alerts in all categories. Often the minor alerts point to easily fixed oversights, errors and omissions in your CIF or refinement strategy, so attention to these fine details can be worthwhile. In order to resolve some of the more serious problems it may be necessary to carry out additional measurements or structure refinements. However, the purpose of your study may justify the reported deviations and the more serious of these should normally be commented upon in the discussion or experimental section of a paper or in the "special\_details" fields of the CIF. checkCIF was carefully designed to identify outliers and unusual parameters, but every test has its limitations and alerts that are not important in a particular case may appear. Conversely, the absence of alerts does not guarantee there are no aspects of the results needing attention. It is up to the individual to critically assess their own results and, if necessary, seek expert advice.

### Publication of your CIF in IUCr journals

A basic structural check has been run on your CIF. These basic checks will be run on all CIFs submitted for publication in IUCr journals (*Acta Crystallographica*, *Journal of Applied Crystallography*, *Journal of Synchrotron Radiation*); however, if you intend to submit to *Acta Crystallographica Section C* or *E* or *IUCrData*, you should make sure that full publication checks are run on the final version of your CIF prior to submission.

### Publication of your CIF in other journals

Please refer to the *Notes for Authors* of the relevant journal for any special instructions relating to CIF submission.

### Validation response form

Please find below a validation response form (VRF) that can be filled in and pasted into your CIF.

```
# start Validation Reply Form
_vrf_PLAT084_fl206_a
;
PROBLEM: High wR2 Value (i.e. > 0.25) ..... 0.32 Report
RESPONSE: ...
;
_vrf_PLAT094_fl206_a
;
PROBLEM: Ratio of Maximum / Minimum Residual Density .... 2.47 Report
RESPONSE: ...
;
_vrf_PLAT234_fl206_a
;
PROBLEM: Large Hirshfeld Difference N3B -- C4B .. 0.23 Ang.
RESPONSE: ...
;
_vrf_PLAT250_fl206_a
;
PROBLEM: Large U3/U1 Ratio for Average U(i,j) Tensor .... 2.2 Note
RESPONSE: ...
;
_vrf_PLAT341_fl206_a
;
PROBLEM: Low Bond Precision on C-C Bonds ..... 0.01136 Ang.
RESPONSE: ...
;
# end Validation Reply Form
```

PLATON version of 27/03/2017; check.def file version of 24/03/2017

Datablock fl206\_a - ellipsoid plot

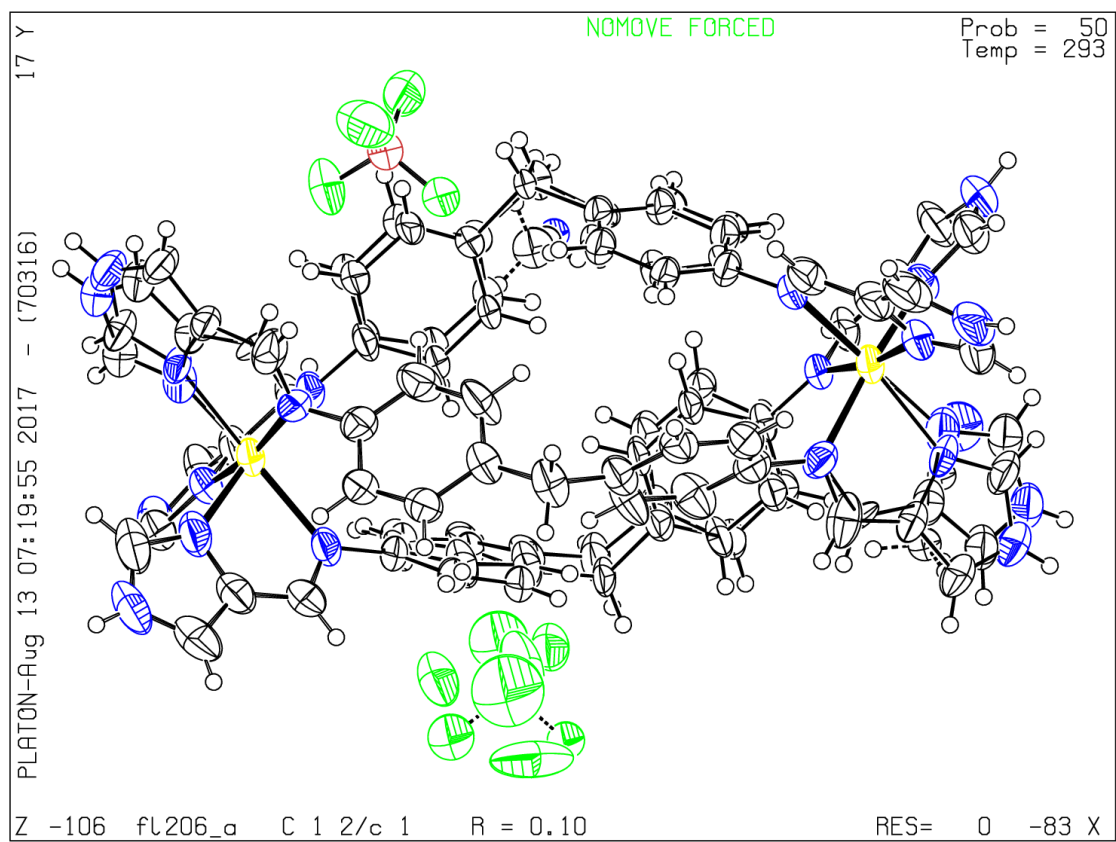

Supplement: s1 [file s1]
