# Supplementary material
Source: MDPI journal article supplement (https://www.mdpi.com/2304-6740/5/4/62)

# checkCIF/PLATON report

You have not supplied any structure factors. As a result the full set of tests cannot be run.

THIS REPORT IS FOR GUIDANCE ONLY. IF USED AS PART OF A REVIEW PROCEDURE FOR PUBLICATION, IT SHOULD NOT REPLACE THE EXPERTISE OF AN EXPERIENCED CRYSTALLOGRAPHIC REFEREE.

No syntax errors found.      CIF dictionary      Interpreting this report

## Datablock: I

---

|                        |                                                                 |                                            |
|------------------------|-----------------------------------------------------------------|--------------------------------------------|
| Bond precision:        | C-C = 0.0065 A                                                  | Wavelength=0.71073                         |
| Cell:                  | a=13.837(3)                                                     | b=13.855(3)      c=20.684(4)               |
|                        | alpha=77.43(3)                                                  | beta=77.58(3)      gamma=86.73(3)          |
| Temperature:           | 100 K                                                           |                                            |
|                        | Calculated                                                      | Reported                                   |
| Volume                 | 3779.5(15)                                                      | 3779.5(15)                                 |
| Space group            | P -1                                                            | P -1                                       |
| Hall group             | -P 1                                                            | -P 1                                       |
| Moiety formula         | C60 H48 Fe2 N18 O3,<br>0.25(C4 H6 N2), 4(B F4),<br>1.5(C2 H3 N) | C60 H48 Fe2 N18 O3, 2(C2<br>H3 N), 4(B F4) |
| Sum formula            | C64 H54 B4 F16 Fe2 N20 O3                                       | C64 H54 B4 F16 Fe2 N20 O3                  |
| Mr                     | 1610.22                                                         | 1610.21                                    |
| Dx, g cm <sup>-3</sup> | 1.415                                                           | 1.415                                      |
| Z                      | 2                                                               | 2                                          |
| Mu (mm <sup>-1</sup> ) | 0.481                                                           | 0.481                                      |
| F000                   | 1636.0                                                          | 1636.0                                     |
| F000'                  | 1638.28                                                         |                                            |
| h,k,lmax               | 17,17,26                                                        | 17,17,26                                   |
| Nref                   | 16519                                                           | 14860                                      |
| Tmin,Tmax              | 0.994,0.995                                                     |                                            |
| Tmin'                  | 0.990                                                           |                                            |

Correction method= Not given

Data completeness= 0.900      Theta(max)= 26.999

R(reflections)= 0.0691( 11524)      wR2(reflections)= 0.2111( 14860)

S = 1.071      Npar= 1095

---

The following ALERTS were generated. Each ALERT has the format  
**test-name\_ALERT\_alert-type\_alert-level.**  
 Click on the hyperlinks for more details of the test.

---

#### Alert level A

PLAT029\_ALERT\_3\_A \_diffrn\_measured\_fraction\_theta\_full value Low . 0.909 Note

**Author Response: 'The MX2 beam line of the Australian Synchrotron is a single circle instrument, leaving gaps in the coverage of the reciprocal space.'**

---

#### Alert level B

PLAT232\_ALERT\_2\_B Hirshfeld Test Diff (M-X) Fe02 -- N4B .. 16.3 s.u.

**Author Response: 'Data sets corrected for absorption effects often show large DELU values for bonds involving the heaviest atom. The data was treated with SADABS absorption correction, which may be a cause of such test results around the heavy scattering Fe(II).'**

PLAT232\_ALERT\_2\_B Hirshfeld Test Diff (M-X) Fe02 -- N6C .. 11.8 s.u.

**Author Response: 'Data sets corrected for absorption effects often show large DELU values for bonds involving the heaviest atom. The data was treated with SADABS absorption correction, which may be a cause of such test results around the heavy scattering Fe(II).'**

---

#### Alert level C

PLAT230\_ALERT\_2\_C Hirshfeld Test Diff for N1B -- C1B .. 6.0 s.u.  
 PLAT230\_ALERT\_2\_C Hirshfeld Test Diff for N1B -- C3B .. 5.3 s.u.  
 PLAT230\_ALERT\_2\_C Hirshfeld Test Diff for N2B -- C2B .. 5.7 s.u.  
 PLAT241\_ALERT\_2\_C High 'MainMol' Ueq as Compared to Neighbors of C16A Check  
 PLAT241\_ALERT\_2\_C High 'MainMol' Ueq as Compared to Neighbors of C17B Check  
 PLAT341\_ALERT\_3\_C Low Bond Precision on C-C Bonds ..... 0.00647 Ang.

---

#### Alert level G

PLAT003\_ALERT\_2\_G Number of Uiso or Uij Restrained non-H Atoms ... 16 Report  
 PLAT007\_ALERT\_5\_G Number of Unrefined Donor-H Atoms ..... 7 Report  
 PLAT012\_ALERT\_1\_G No \_shelx\_res\_checksum found in CIF ..... Please Check  
 PLAT042\_ALERT\_1\_G Calc. and Reported MoietyFormula Strings Differ Please Check  
 PLAT072\_ALERT\_2\_G SHELXL First Parameter in WGHT Unusually Large 0.11 Report  
 PLAT083\_ALERT\_2\_G SHELXL Second Parameter in WGHT Unusually Large 7.12 Why ?  
 PLAT112\_ALERT\_2\_G ADDSYM Detects New (Pseudo) Symm. Elem. c 92 %Fit  
 PLAT113\_ALERT\_2\_G ADDSYM Suggests Possible Pseudo/New Space Group C2/c Check  
 PLAT154\_ALERT\_1\_G The s.u.'s on the Cell Angles are Equal ..(Note) 0.03 Degree  
 PLAT171\_ALERT\_4\_G The CIF-Embedded .res File Contains EADP Records 1 Report  
 PLAT177\_ALERT\_4\_G The CIF-Embedded .res File Contains DELU Records 1 Report

|                   |                                                  |     |        |
|-------------------|--------------------------------------------------|-----|--------|
| PLAT187_ALERT_4_G | The CIF-Embedded .res File Contains RIGU Records | 10  | Report |
| PLAT230_ALERT_2_G | Hirshfeld Test Diff for C7AA -- C17B ..          | 7.3 | s.u.   |
| PLAT230_ALERT_2_G | Hirshfeld Test Diff for C17B -- C18B ..          | 6.7 | s.u.   |
| PLAT232_ALERT_2_G | Hirshfeld Test Diff (M-X) Fe01 -- N1A ..         | 7.6 | s.u.   |

**Author Response: 'Data sets corrected for absorption effects often show large DELU values for bonds involving the heaviest atom. The data was treated with SADABS absorption correction, which may be a cause of such test results around the heavy scattering Fe(II).'**

|                   |                                          |     |      |
|-------------------|------------------------------------------|-----|------|
| PLAT232_ALERT_2_G | Hirshfeld Test Diff (M-X) Fe01 -- N1B .. | 6.5 | s.u. |
|-------------------|------------------------------------------|-----|------|

**Author Response: 'Data sets corrected for absorption effects often show large DELU values for bonds involving the heaviest atom. The data was treated with SADABS absorption correction, which may be a cause of such test results around the heavy scattering Fe(II).'**

|                   |                                          |     |      |
|-------------------|------------------------------------------|-----|------|
| PLAT232_ALERT_2_G | Hirshfeld Test Diff (M-X) Fe01 -- N3B .. | 9.2 | s.u. |
|-------------------|------------------------------------------|-----|------|

**Author Response: 'Data sets corrected for absorption effects often show large DELU values for bonds involving the heaviest atom. The data was treated with SADABS absorption correction, which may be a cause of such test results around the heavy scattering Fe(II).'**

|                   |                                               |      |       |
|-------------------|-----------------------------------------------|------|-------|
| PLAT244_ALERT_4_G | Low 'Solvent' Ueq as Compared to Neighbors of | B02R | Check |
| PLAT244_ALERT_4_G | Low 'Solvent' Ueq as Compared to Neighbors of | B02N | Check |
| PLAT244_ALERT_4_G | Low 'Solvent' Ueq as Compared to Neighbors of | B02P | Check |
| PLAT244_ALERT_4_G | Low 'Solvent' Ueq as Compared to Neighbors of | B02Q | Check |
| PLAT300_ALERT_4_G | Atom Site Occupancy of N1AA is Constrained at | 0.5  | Check |
| PLAT300_ALERT_4_G | Atom Site Occupancy of N2AA is Constrained at | 0.5  | Check |
| PLAT300_ALERT_4_G | Atom Site Occupancy of N5B is Constrained at  | 0.5  | Check |
| PLAT300_ALERT_4_G | Atom Site Occupancy of N6B is Constrained at  | 0.5  | Check |
| PLAT300_ALERT_4_G | Atom Site Occupancy of C4AA is Constrained at | 0.5  | Check |
| PLAT300_ALERT_4_G | Atom Site Occupancy of C3AA is Constrained at | 0.5  | Check |
| PLAT300_ALERT_4_G | Atom Site Occupancy of C9C is Constrained at  | 0.5  | Check |
| PLAT300_ALERT_4_G | Atom Site Occupancy of C5AA is Constrained at | 0.5  | Check |
| PLAT300_ALERT_4_G | Atom Site Occupancy of C10C is Constrained at | 0.5  | Check |
| PLAT300_ALERT_4_G | Atom Site Occupancy of C6AA is Constrained at | 0.5  | Check |
| PLAT300_ALERT_4_G | Atom Site Occupancy of C7AA is Constrained at | 0.5  | Check |
| PLAT300_ALERT_4_G | Atom Site Occupancy of C18B is Constrained at | 0.5  | Check |
| PLAT300_ALERT_4_G | Atom Site Occupancy of C19B is Constrained at | 0.5  | Check |
| PLAT300_ALERT_4_G | Atom Site Occupancy of C20B is Constrained at | 0.5  | Check |
| PLAT300_ALERT_4_G | Atom Site Occupancy of H4AA is Constrained at | 0.5  | Check |
| PLAT300_ALERT_4_G | Atom Site Occupancy of H3AA is Constrained at | 0.5  | Check |
| PLAT300_ALERT_4_G | Atom Site Occupancy of H5B is Constrained at  | 0.5  | Check |
| PLAT300_ALERT_4_G | Atom Site Occupancy of H9C is Constrained at  | 0.5  | Check |
| PLAT300_ALERT_4_G | Atom Site Occupancy of H10C is Constrained at | 0.5  | Check |
| PLAT300_ALERT_4_G | Atom Site Occupancy of H5AA is Constrained at | 0.5  | Check |
| PLAT300_ALERT_4_G | Atom Site Occupancy of H2AB is Constrained at | 0.5  | Check |
| PLAT300_ALERT_4_G | Atom Site Occupancy of H6AA is Constrained at | 0.5  | Check |
| PLAT300_ALERT_4_G | Atom Site Occupancy of H17B is Constrained at | 0.5  | Check |
| PLAT300_ALERT_4_G | Atom Site Occupancy of H17C is Constrained at | 0.5  | Check |
| PLAT300_ALERT_4_G | Atom Site Occupancy of H19B is Constrained at | 0.5  | Check |
| PLAT300_ALERT_4_G | Atom Site Occupancy of H20B is Constrained at | 0.5  | Check |
| PLAT300_ALERT_4_G | Atom Site Occupancy of N0AA is Constrained at | 0.25 | Check |
| PLAT300_ALERT_4_G | Atom Site Occupancy of N4 is Constrained at   | 0.25 | Check |

|                   |                                                  |                   |      |        |
|-------------------|--------------------------------------------------|-------------------|------|--------|
| PLAT300_ALERT_4_G | Atom Site Occupancy of C2                        | is Constrained at | 0.25 | Check  |
| PLAT300_ALERT_4_G | Atom Site Occupancy of C5                        | is Constrained at | 0.25 | Check  |
| PLAT300_ALERT_4_G | Atom Site Occupancy of C0AA                      | is Constrained at | 0.25 | Check  |
| PLAT300_ALERT_4_G | Atom Site Occupancy of C2AA                      | is Constrained at | 0.25 | Check  |
| PLAT300_ALERT_4_G | Atom Site Occupancy of H2D                       | is Constrained at | 0.25 | Check  |
| PLAT300_ALERT_4_G | Atom Site Occupancy of H2E                       | is Constrained at | 0.25 | Check  |
| PLAT300_ALERT_4_G | Atom Site Occupancy of H2F                       | is Constrained at | 0.25 | Check  |
| PLAT300_ALERT_4_G | Atom Site Occupancy of H2AC                      | is Constrained at | 0.25 | Check  |
| PLAT300_ALERT_4_G | Atom Site Occupancy of H2AD                      | is Constrained at | 0.25 | Check  |
| PLAT300_ALERT_4_G | Atom Site Occupancy of H2AE                      | is Constrained at | 0.25 | Check  |
| PLAT300_ALERT_4_G | Atom Site Occupancy of N03I                      | is Constrained at | 0.5  | Check  |
| PLAT300_ALERT_4_G | Atom Site Occupancy of C02S                      | is Constrained at | 0.5  | Check  |
| PLAT300_ALERT_4_G | Atom Site Occupancy of C02W                      | is Constrained at | 0.5  | Check  |
| PLAT300_ALERT_4_G | Atom Site Occupancy of H02A                      | is Constrained at | 0.5  | Check  |
| PLAT300_ALERT_4_G | Atom Site Occupancy of H02B                      | is Constrained at | 0.5  | Check  |
| PLAT300_ALERT_4_G | Atom Site Occupancy of H02C                      | is Constrained at | 0.5  | Check  |
| PLAT300_ALERT_4_G | Atom Site Occupancy of N02Y                      | is Constrained at | 0.5  | Check  |
| PLAT300_ALERT_4_G | Atom Site Occupancy of C02X                      | is Constrained at | 0.5  | Check  |
| PLAT300_ALERT_4_G | Atom Site Occupancy of C02Z                      | is Constrained at | 0.5  | Check  |
| PLAT300_ALERT_4_G | Atom Site Occupancy of H02D                      | is Constrained at | 0.5  | Check  |
| PLAT300_ALERT_4_G | Atom Site Occupancy of H02E                      | is Constrained at | 0.5  | Check  |
| PLAT300_ALERT_4_G | Atom Site Occupancy of H02F                      | is Constrained at | 0.5  | Check  |
| PLAT300_ALERT_4_G | Atom Site Occupancy of N3                        | is Constrained at | 0.5  | Check  |
| PLAT300_ALERT_4_G | Atom Site Occupancy of C1                        | is Constrained at | 0.5  | Check  |
| PLAT300_ALERT_4_G | Atom Site Occupancy of C1AA                      | is Constrained at | 0.5  | Check  |
| PLAT300_ALERT_4_G | Atom Site Occupancy of H1D                       | is Constrained at | 0.5  | Check  |
| PLAT300_ALERT_4_G | Atom Site Occupancy of H1E                       | is Constrained at | 0.5  | Check  |
| PLAT300_ALERT_4_G | Atom Site Occupancy of H1F                       | is Constrained at | 0.5  | Check  |
| PLAT301_ALERT_3_G | Main Residue Disorder .....                      | (Resd 1) ..       | 8    | % Note |
| PLAT302_ALERT_4_G | Anion/Solvent/Minor-Residue Disorder (Resd 2) .. |                   | 100  | % Note |
| PLAT302_ALERT_4_G | Anion/Solvent/Minor-Residue Disorder (Resd 7) .. |                   | 100  | % Note |
| PLAT302_ALERT_4_G | Anion/Solvent/Minor-Residue Disorder (Resd 8) .. |                   | 100  | % Note |
| PLAT302_ALERT_4_G | Anion/Solvent/Minor-Residue Disorder (Resd 9) .. |                   | 100  | % Note |
| PLAT432_ALERT_2_G | Short Inter X...Y Contact F00T .. C0AA ..        |                   | 2.94 | Ang.   |
| PLAT720_ALERT_4_G | Number of Unusual/Non-Standard Labels .....      |                   | 56   | Note   |
| PLAT790_ALERT_4_G | Centre of Gravity not Within Unit Cell: Resd. #  |                   | 7    | Note   |
|                   | C2 H3 N                                          |                   |      |        |
| PLAT790_ALERT_4_G | Centre of Gravity not Within Unit Cell: Resd. #  |                   | 8    | Note   |
|                   | C2 H3 N                                          |                   |      |        |
| PLAT860_ALERT_3_G | Number of Least-Squares Restraints .....         |                   | 33   | Note   |

---

1 **ALERT level A** = Most likely a serious problem - resolve or explain  
 2 **ALERT level B** = A potentially serious problem, consider carefully  
 6 **ALERT level C** = Check. Ensure it is not caused by an omission or oversight  
 87 **ALERT level G** = General information/check it is not something unexpected

3 ALERT type 1 CIF construction/syntax error, inconsistent or missing data  
 18 ALERT type 2 Indicator that the structure model may be wrong or deficient  
 4 ALERT type 3 Indicator that the structure quality may be low  
 70 ALERT type 4 Improvement, methodology, query or suggestion  
 1 ALERT type 5 Informative message, check

---

## checkCIF publication errors

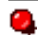

## Alert level A

PUBL006\_ALERT\_1\_A \_publ\_requested\_journal is missing

e.g. 'Acta Crystallographica Section C'

PUBL008\_ALERT\_1\_A \_publ\_section\_title is missing. Title of paper.

PUBL012\_ALERT\_1\_A \_publ\_section\_abstract is missing.

Abstract of paper in English.

---

3 **ALERT level A** = Data missing that is essential or data in wrong format

0 **ALERT level G** = General alerts. Data that may be required is missing

---

## Publication of your CIF

You should attempt to resolve as many as possible of the alerts in all categories. Often the minor alerts point to easily fixed oversights, errors and omissions in your CIF or refinement strategy, so attention to these fine details can be worthwhile. In order to resolve some of the more serious problems it may be necessary to carry out additional measurements or structure refinements. However, the nature of your study may justify the reported deviations from journal submission requirements and the more serious of these should be commented upon in the discussion or experimental section of a paper or in the "special\_details" fields of the CIF. *checkCIF* was carefully designed to identify outliers and unusual parameters, but every test has its limitations and alerts that are not important in a particular case may appear. Conversely, the absence of alerts does not guarantee there are no aspects of the results needing attention. It is up to the individual to critically assess their own results and, if necessary, seek expert advice.

If level A alerts remain, which you believe to be justified deviations, and you intend to submit this CIF for publication in a journal, you should additionally insert an explanation in your CIF using the Validation Reply Form (VRF) below. This will allow your explanation to be considered as part of the review process.

## Validation response form

Please find below a validation response form (VRF) that can be filled in and pasted into your CIF.

```
# start Validation Reply Form
_vrf_PUBL006_GLOBAL
;
PROBLEM: _publ_requested_journal is missing
RESPONSE: ...
;
_vrf_PUBL008_GLOBAL
;
PROBLEM: _publ_section_title is missing. Title of paper.
RESPONSE: ...
;
_vrf_PUBL012_GLOBAL
;
PROBLEM: _publ_section_abstract is missing.
RESPONSE: ...
;
# end Validation Reply Form
```

If you wish to submit your CIF for publication in Acta Crystallographica Section C or E, you should upload your CIF via the web. If you wish to submit your CIF for publication in IUCrData you should upload your CIF via the web. If your CIF is to form part of a submission to another IUCr journal, you will be asked, either during electronic submission or by the Co-editor handling your paper, to upload your CIF via our web site.

---

**PLATON version of 27/03/2017; check.def file version of 24/03/2017**

Datablock I - ellipsoid plot

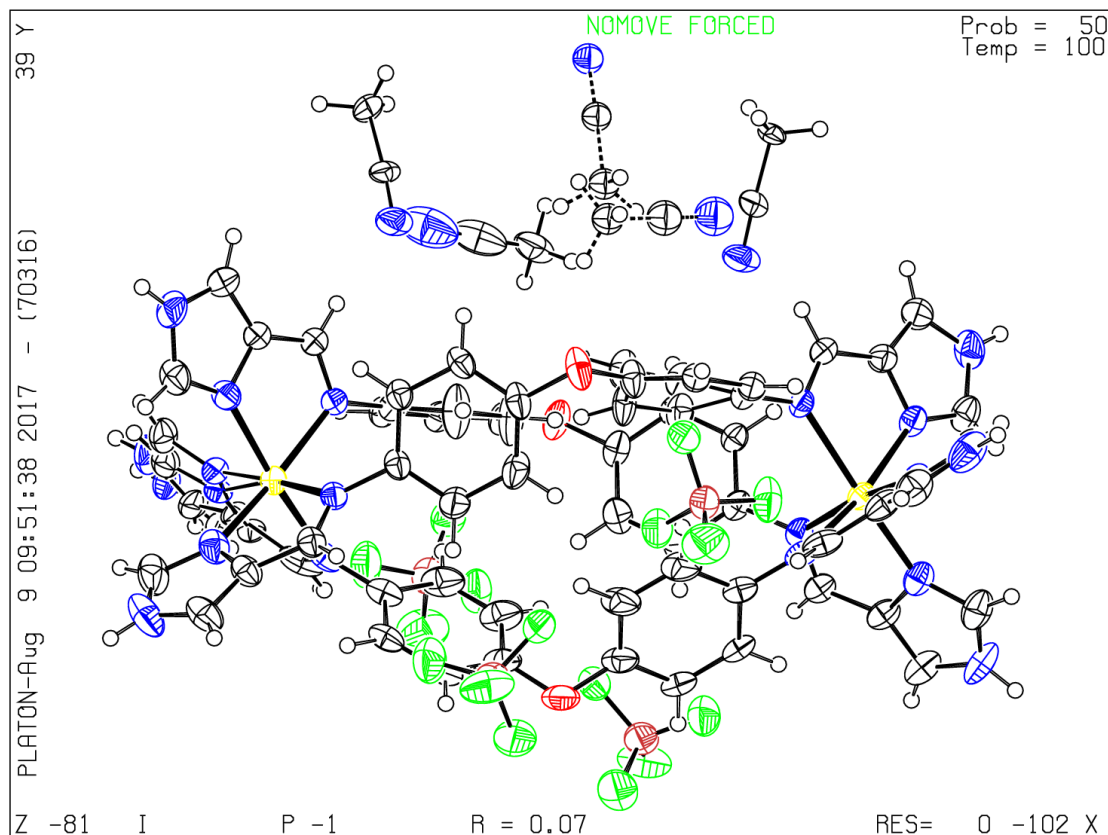

Supplement: s1 [file s1]
