# Supplementary material
Source: MDPI journal article supplement (https://www.mdpi.com/2304-6740/5/4/62)
Supplement: s1 [file s1]

# Supplementary Materials : Investigation of the Spin Crossover Properties of Three Dinuclear Fe(II) Triple Helicates by Variation of the Steric Nature of the Ligand Type

Alexander R. Craze, Natasha F. Sciortino, Mohan M. Badbhade, Cameron J. Kepert, Christopher E. Marjo and Feng Li

|                                                                 |           |
|-----------------------------------------------------------------|-----------|
| Table of Contents                                               |           |
| <b>NMR</b> .....                                                | <b>3</b>  |
| <b>Electrospray Ionization Mass spectra</b> .....               | <b>4</b>  |
| <b>Simultaneous thermal analysis (STA) – DSC-<br/>TGA</b> ..... | <b>7</b>  |
| <b>Fourier Transform Infrared spectra</b> .....                 | <b>9</b>  |
| <b>Crystallographic data</b> .....                              | <b>12</b> |
| - Compound 1 –pg 12                                             |           |
| - Compound 2 –pg 25                                             |           |
| - Compound 3 –pg 40                                             |           |
| <b>Magnetic susceptibility</b> .....                            | <b>56</b> |

**$^1\text{H}$  NMR:**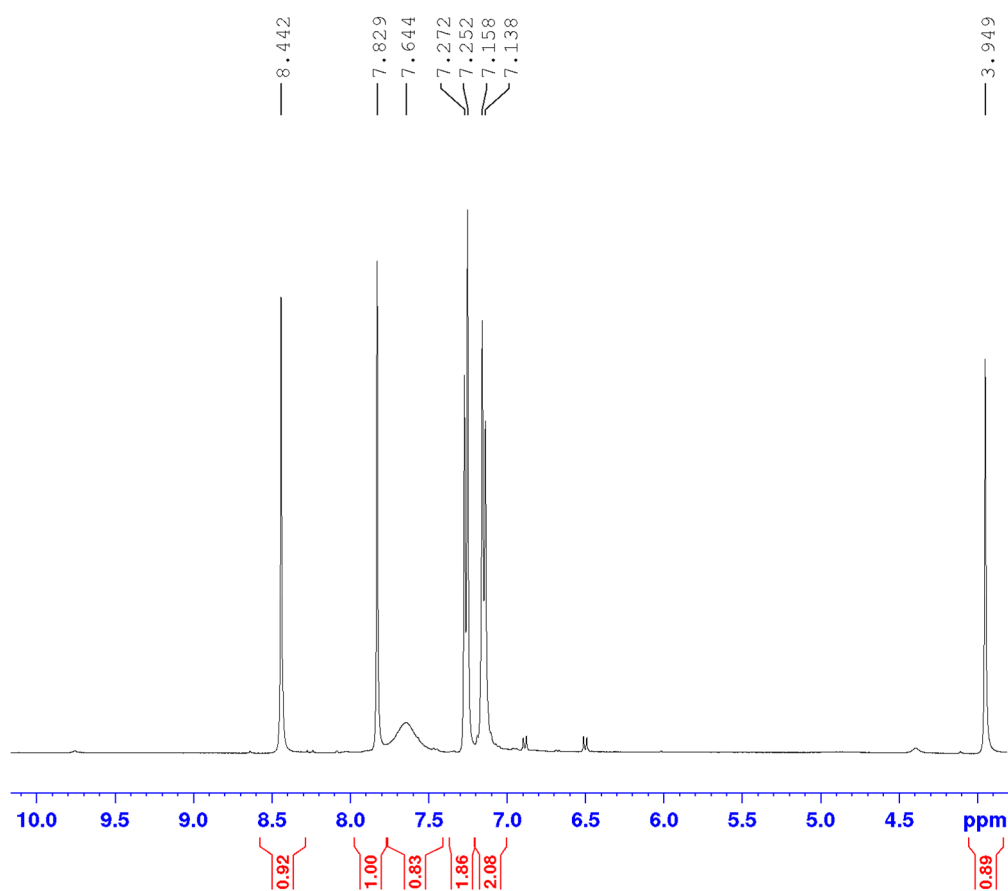**Figure S1.**  $^1\text{H}$ -NMR spectrum of  $\text{L}^1$  (DMSO, 400 MHz).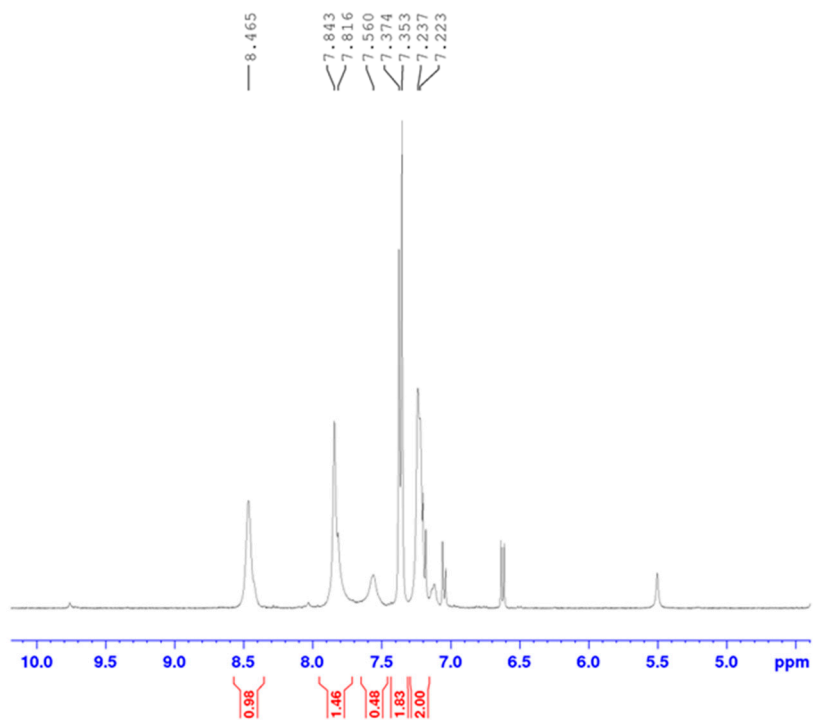**Figure S2.**  $^1\text{H}$ -NMR spectrum of  $\text{L}^2$  (DMSO, 400 MHz).

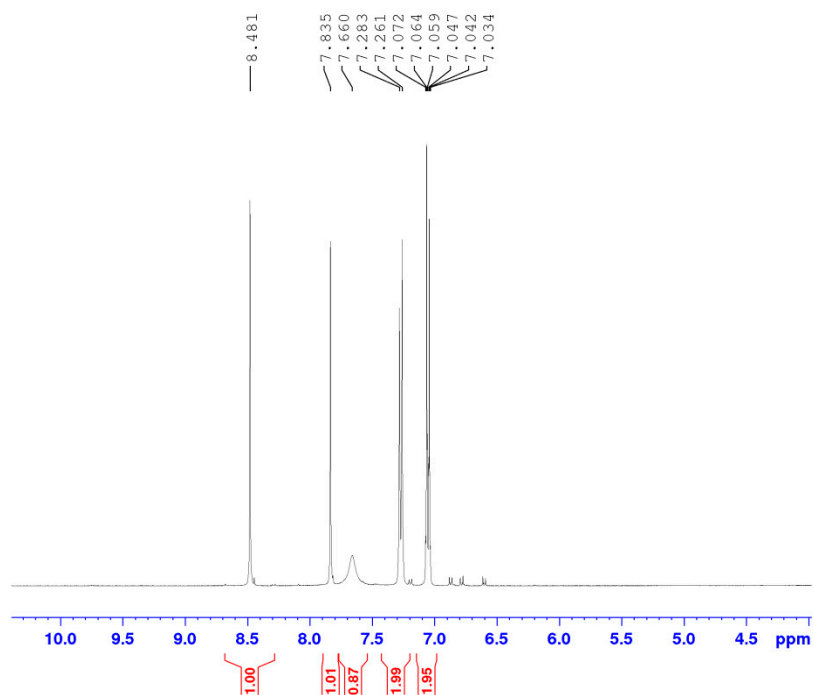

**Figure S3.**  $^1\text{H}$ -NMR spectrum of  $\text{L}^3$  (DMSO, 400 MHz).

### High resolution Electrospray Ionization Mass spectra:

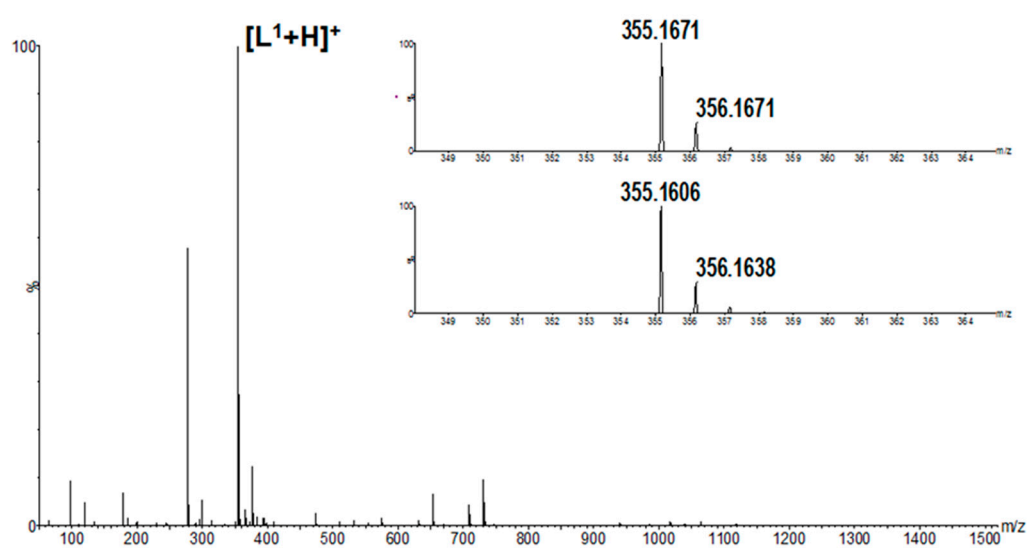

**Figure S4.** ESI-HRMS spectrum of  $\text{L}^1$ . The inset shows the isotope pattern for  $\{[\text{H}+\text{L}^1]^+\}$  (bottom) with the simulated distribution (top).

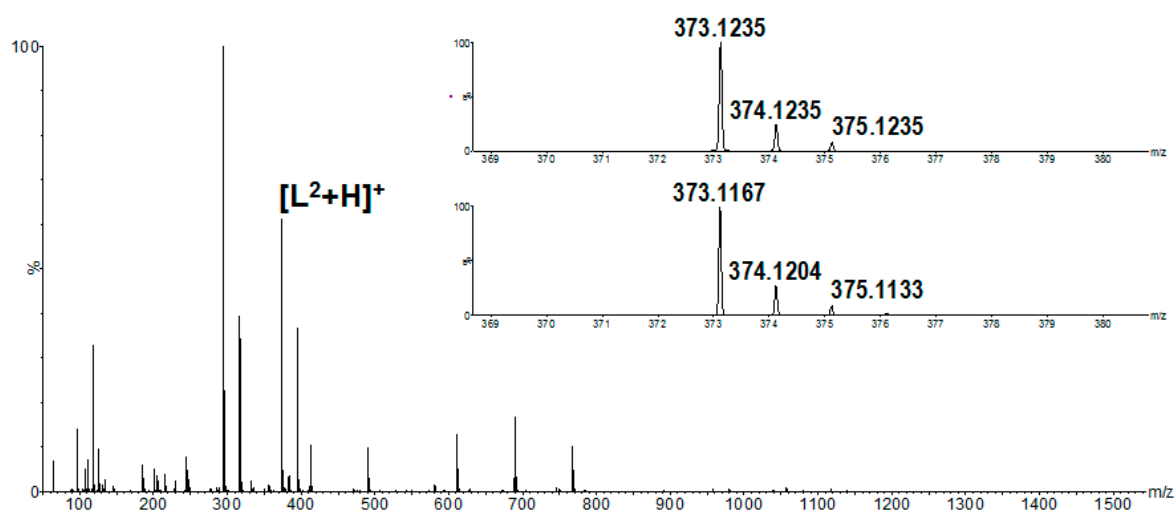

**Figure S5.** ESI-HRMS spectrum of  $L^2$ . The inset shows the isotope pattern for  $\{[H+L^2]^+\}$  (bottom) with the simulated distribution (top).

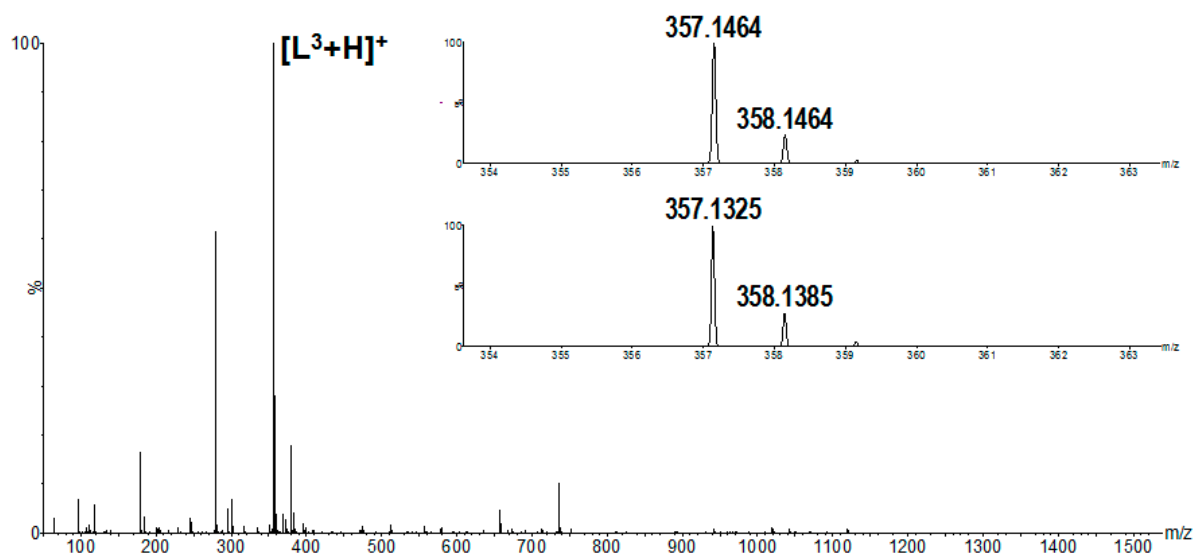

**Figure S6.** ESI-HRMS spectrum of  $L^3$ . The inset shows the isotope pattern for  $\{[H+L^3]^+\}$  (bottom) with the simulated distribution (top).

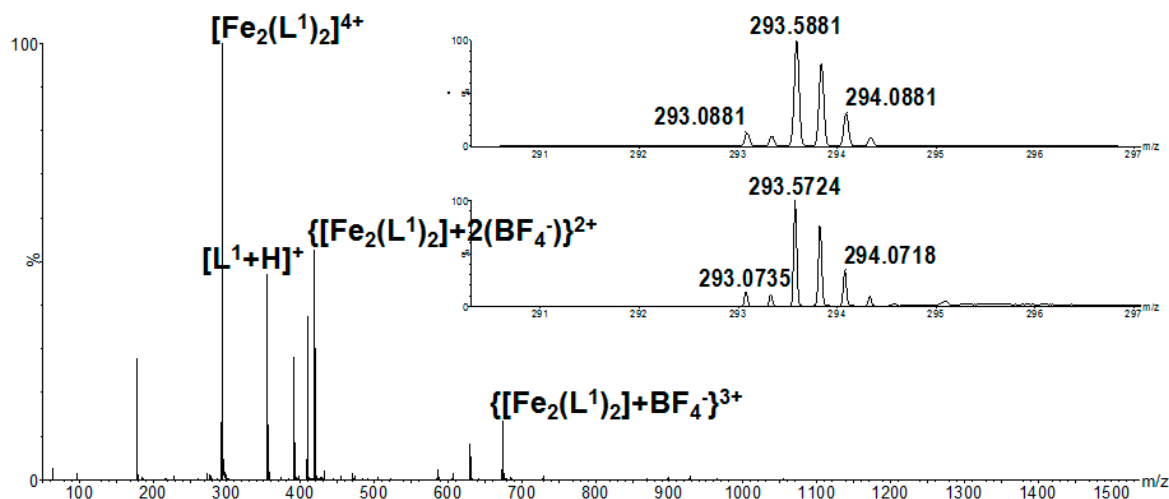

**Figure S7.** ESI-HRMS spectrum of **1**. The inset shows the isotope pattern for  $[\text{Fe}_2(\text{L}^1)_3]^{4+}$  (bottom) with the simulated distribution (top)

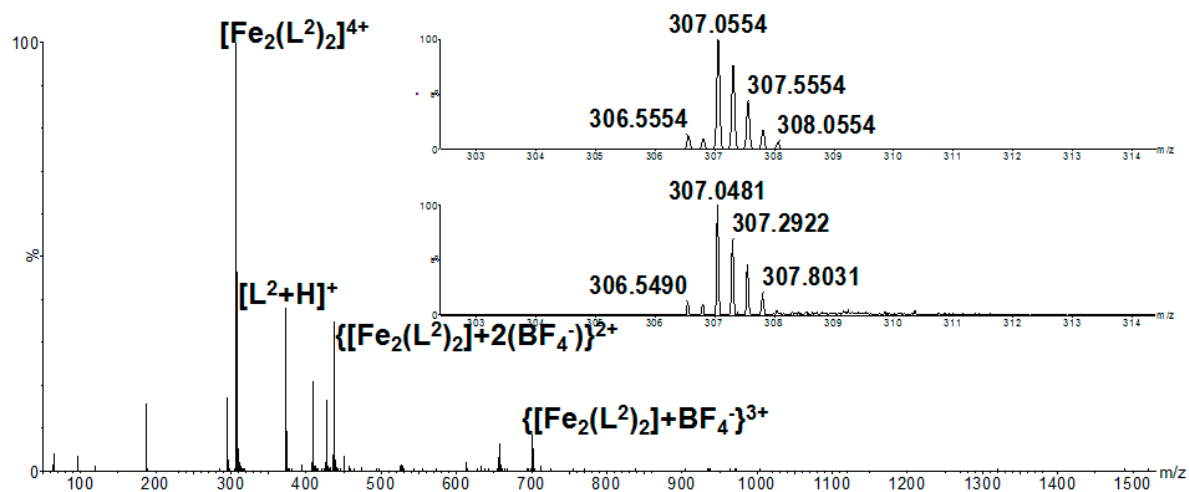

**Figure S8.** ESI-HRMS spectrum of **2**. The inset shows the isotope pattern for  $[\text{Fe}_2(\text{L}^2)_3]^{4+}$  (bottom) with the simulated distribution (top)

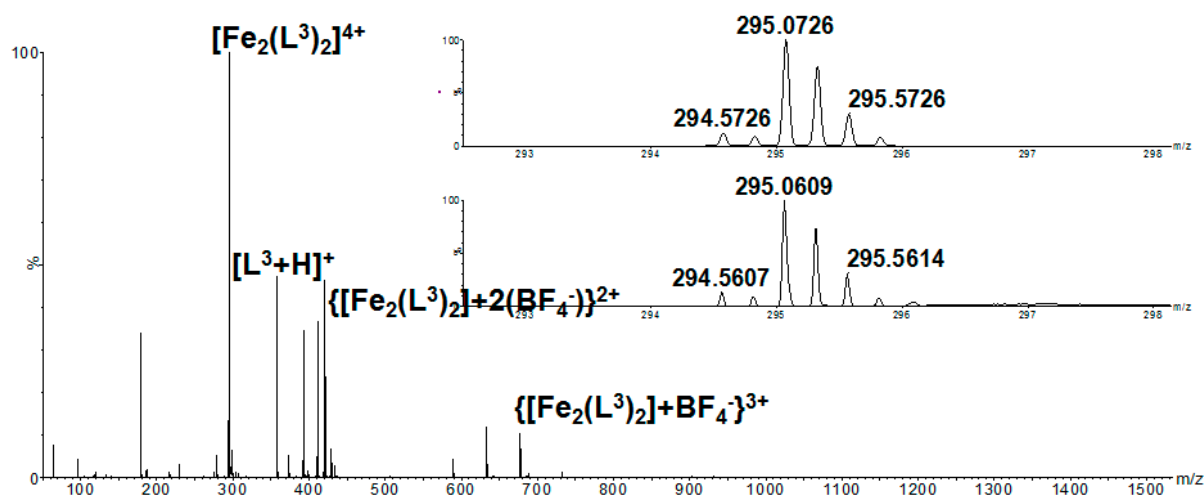

**Figure 9.** ESI-HRMS spectrum of **3**. The inset shows the isotope pattern for  $[\text{Fe}_2(\text{L}^3)_3]^{4+}$  (bottom) with the simulated distribution (top)

### Simultaneous thermal analysis (STA) – DSC-TGA:

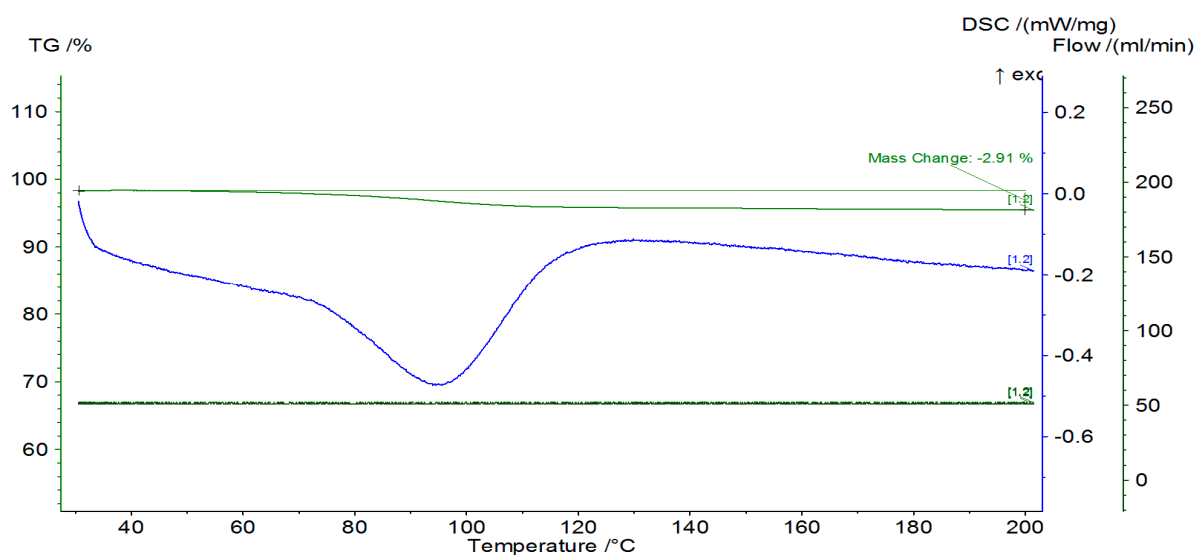

**Figure S10.** Thermogravimetric and differential thermal analysis results for **1**.

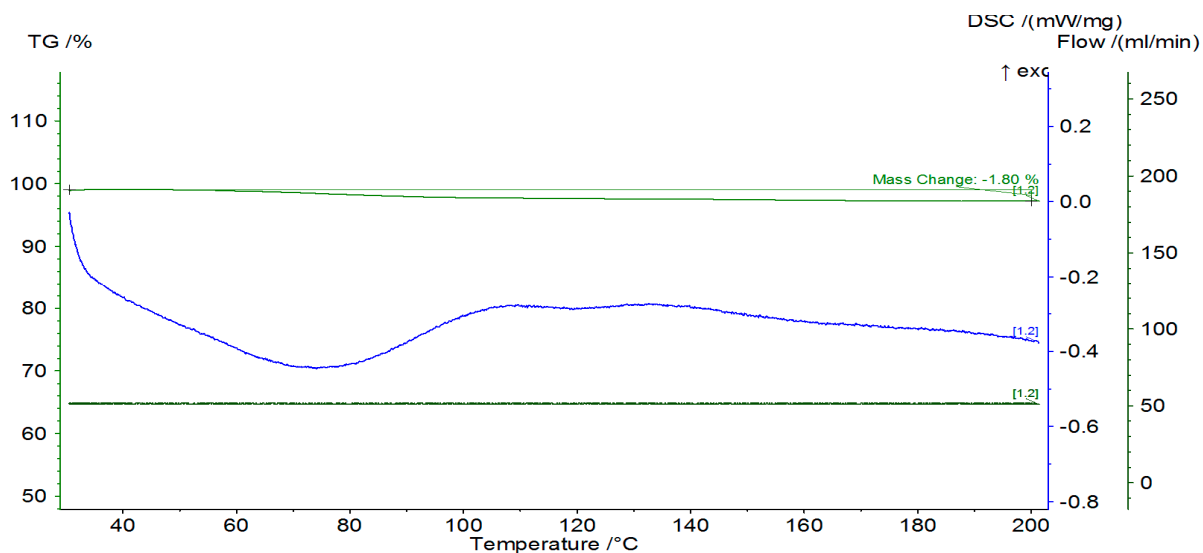

**Figure S11.** Thermogravimetric and differential thermal analysis results for **2**.

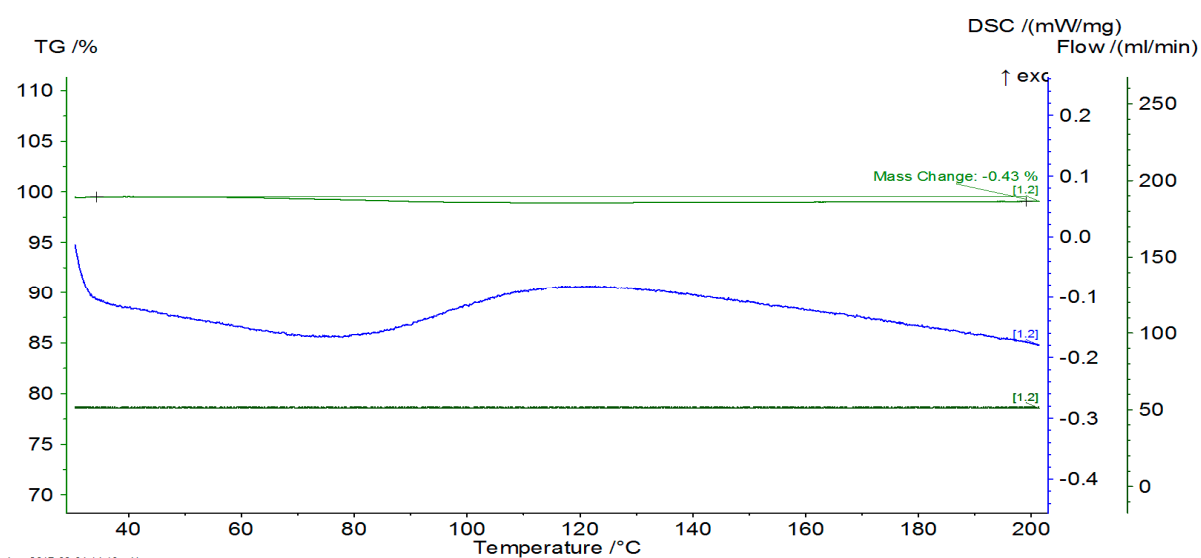

**Figure S12.** Thermogravimetric and differential thermal analysis results for **3**.

Note – acetonitrile solvent coming off between 50 and 100 degrees Celsius. Only a very small mass loss of 2.91, 1.80 and 0.43 % observed for **1**, **2** and **3** respectively.

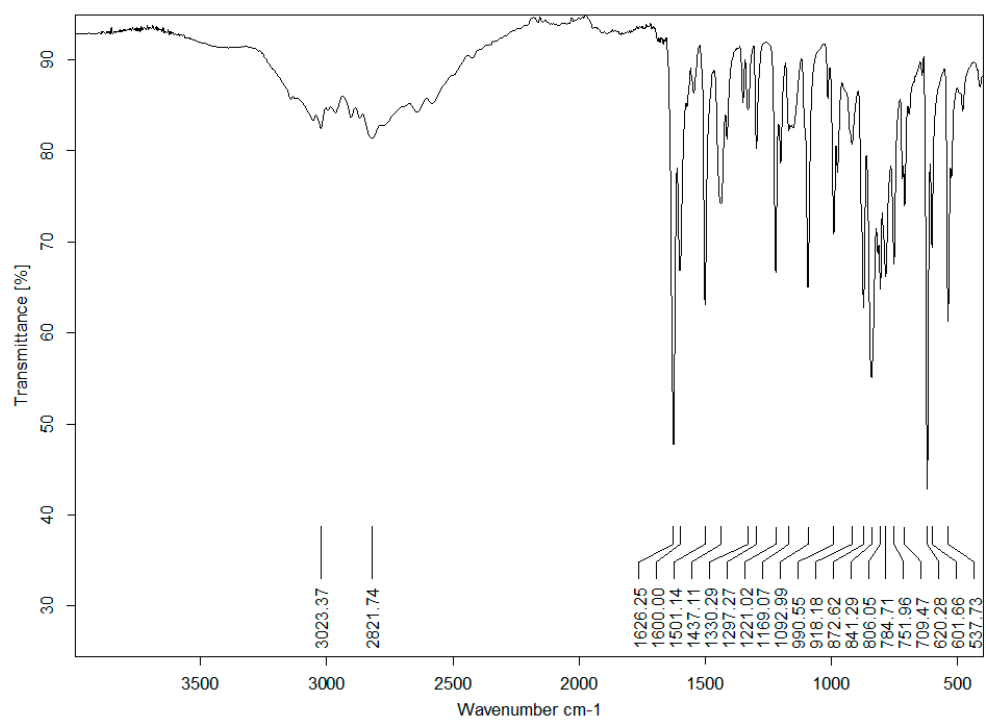

**Figure S13.** FT-IR spectrum of  $L^1$ .

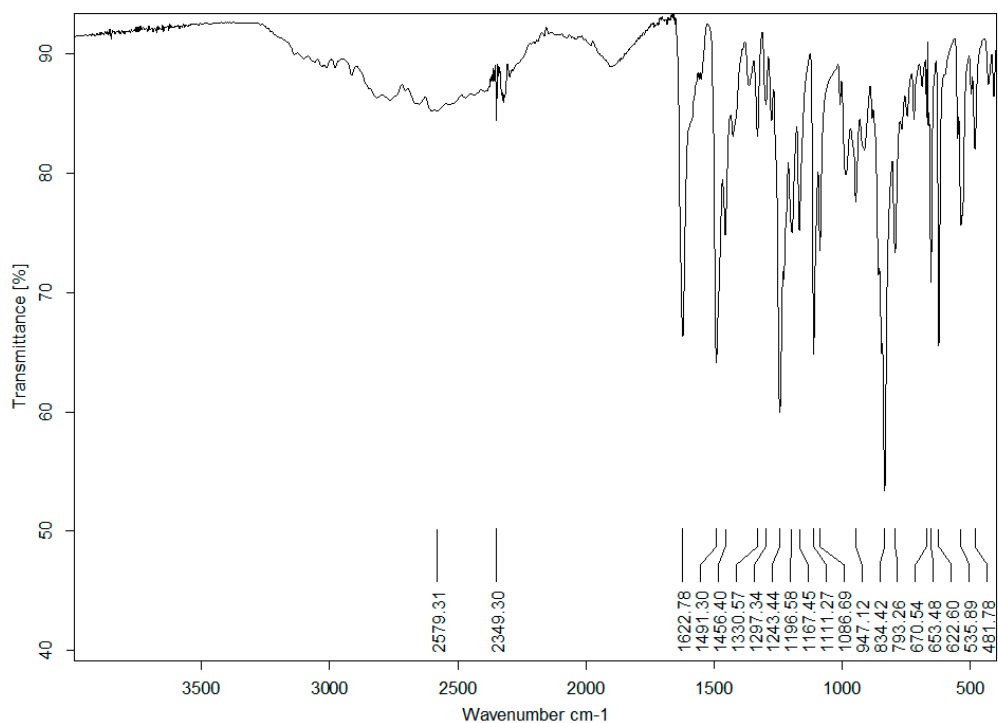

**Figure S14.** FT-IR spectrum of  $L^2$ .



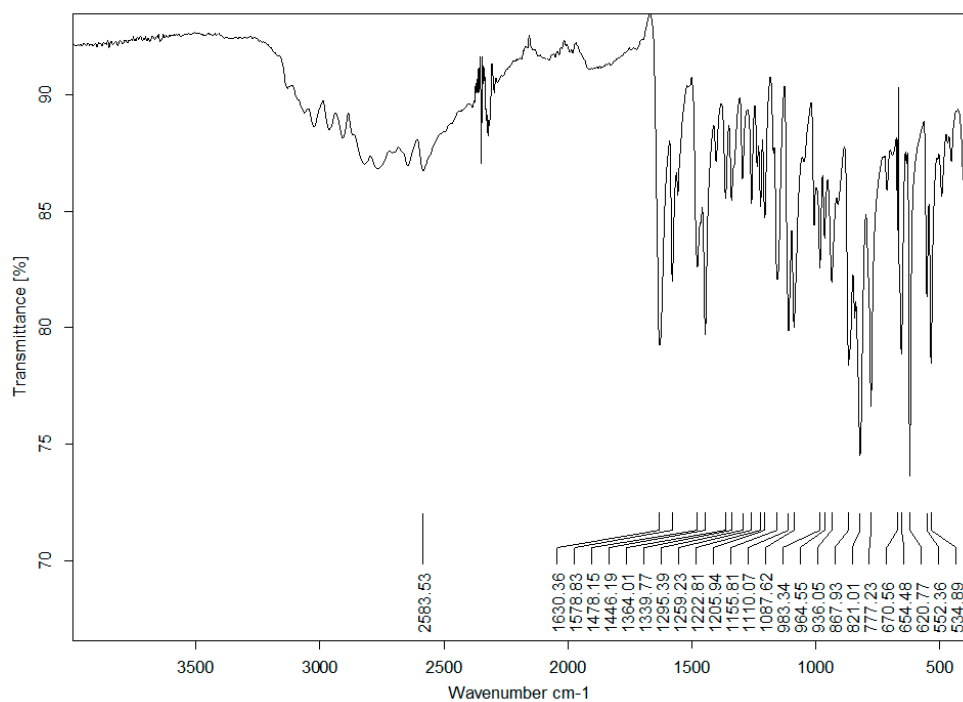

**Figure S15.** FT-IR spectrum of  $L^3$ .

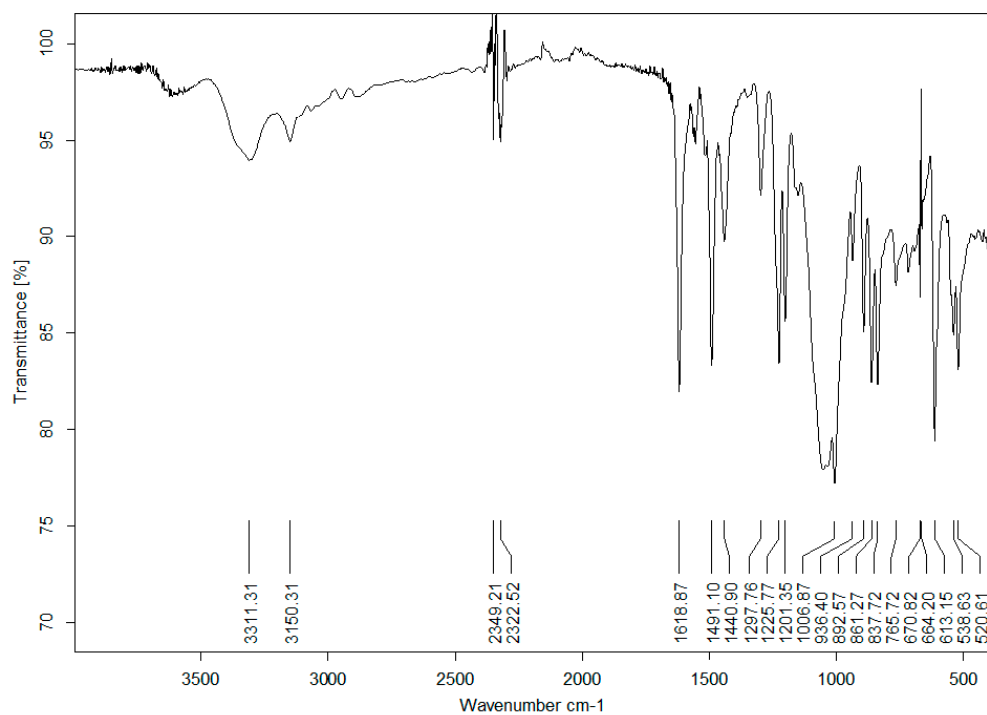

**Figure S16.** FT-IR spectrum of **1**.

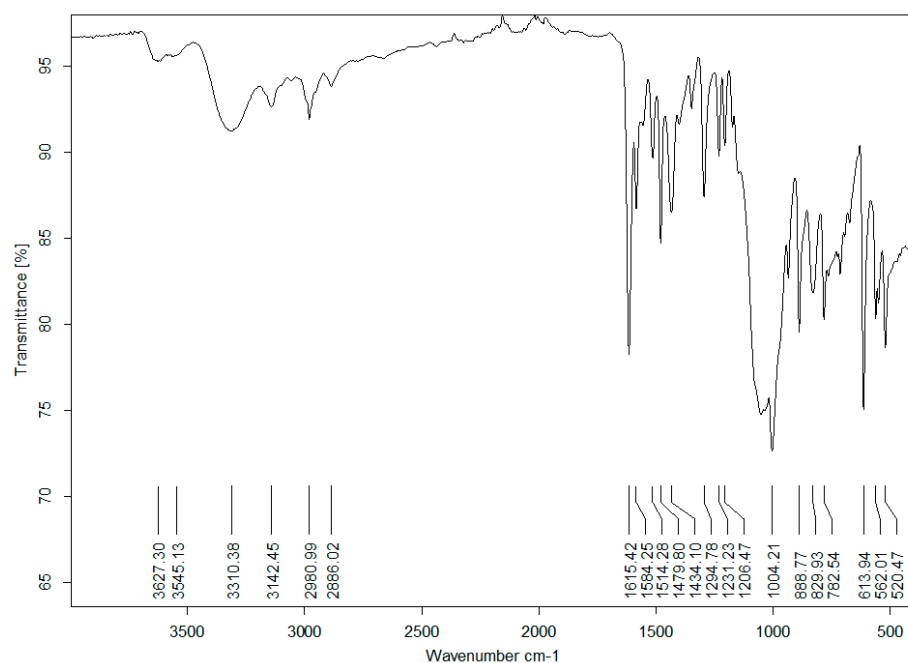

**Figure S17.** FT-IR spectrum of **2**.

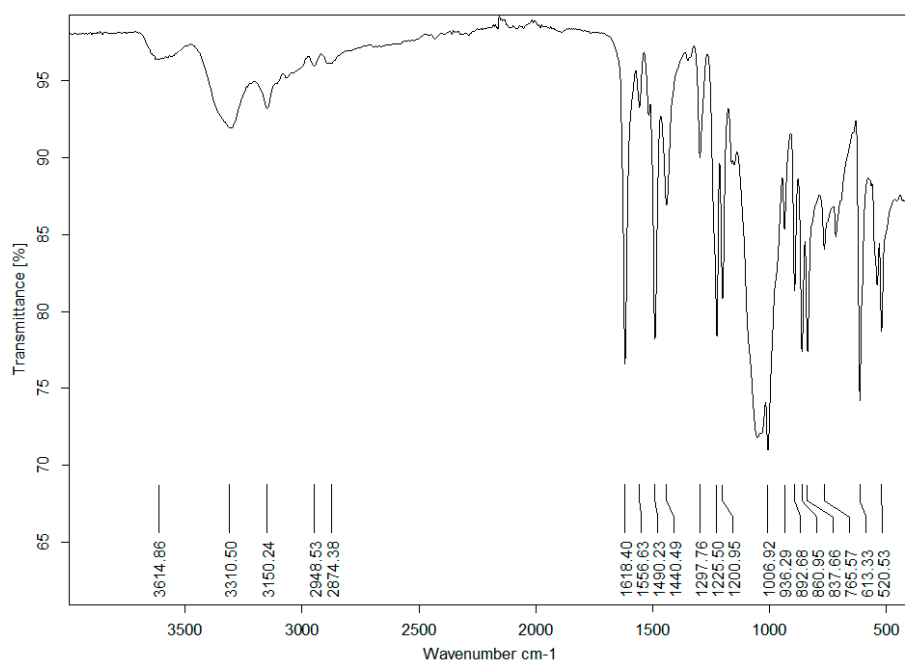

**Figure S18.** FT-IR spectrum of **3**.

**Crystallographic Details:**

Crystal data and structure refinement for **1**.

Table 1 Crystal data and structure refinement for **1**.

|                                             |                                                                                                  |
|---------------------------------------------|--------------------------------------------------------------------------------------------------|
| Identification code                         | FL206_a                                                                                          |
| Empirical formula                           | C <sub>65</sub> H <sub>57</sub> B <sub>4</sub> F <sub>16</sub> Fe <sub>2</sub> N <sub>19.5</sub> |
| Formula weight                              | 1570.24                                                                                          |
| Temperature/K                               | 100                                                                                              |
| Crystal system                              | monoclinic                                                                                       |
| Space group                                 | C2/c                                                                                             |
| a/Å                                         | 21.131(4)                                                                                        |
| b/Å                                         | 17.391(4)                                                                                        |
| c/Å                                         | 21.069(4)                                                                                        |
| α/°                                         | 90                                                                                               |
| β/°                                         | 107.00(3)                                                                                        |
| γ/°                                         | 90                                                                                               |
| Volume/Å <sup>3</sup>                       | 7404(3)                                                                                          |
| Z                                           | 4                                                                                                |
| ρ <sub>calc</sub> /cm <sup>3</sup>          | 1.409                                                                                            |
| μ/mm <sup>-1</sup>                          | 0.486                                                                                            |
| F(000)                                      | 3198.0                                                                                           |
| Crystal size/mm <sup>3</sup>                | 0.02 × 0.01 × 0.01                                                                               |
| Radiation                                   | MoKα (λ = 0.71073)                                                                               |
| 2θ range for data collection/°              | 3.09 to 52.998                                                                                   |
| Index ranges                                | -26 ≤ h ≤ 26, -21 ≤ k ≤ 21, -26 ≤ l ≤ 26                                                         |
| Reflections collected                       | 50460                                                                                            |
| Independent reflections                     | 6995 [R <sub>int</sub> = 0.0697, R <sub>sigma</sub> = 0.0341]                                    |
| Data/restraints/parameters                  | 6995/218/630                                                                                     |
| Goodness-of-fit on F <sup>2</sup>           | 1.096                                                                                            |
| Final R indexes [I >= 2σ (I)]               | R <sub>1</sub> = 0.1035, wR <sub>2</sub> = 0.2930                                                |
| Final R indexes [all data]                  | R <sub>1</sub> = 0.1371, wR <sub>2</sub> = 0.3220                                                |
| Largest diff. peak/hole / e Å <sup>-3</sup> | 1.37/-0.56                                                                                       |

Table 2 Fractional Atomic Coordinates (×10<sup>4</sup>) and Equivalent Isotropic Displacement Parameters (Å<sup>2</sup>×10<sup>3</sup>) for **1**. U<sub>eq</sub> is defined as 1/3 of the trace of the orthogonalised U<sub>ij</sub> tensor.

| Atom | x         | y         | z         | U(eq)   |
|------|-----------|-----------|-----------|---------|
| Fe01 | 4398.4(5) | 2776.3(6) | 4604.0(5) | 50.7(3) |

|                  |          |          |          |          |
|------------------|----------|----------|----------|----------|
| N <sub>1A</sub>  | 3882(4)  | 3668(4)  | 4013(3)  | 65.0(18) |
| N <sub>2A</sub>  | 3417(4)  | 4647(6)  | 3368(4)  | 88(3)    |
| N <sub>3A</sub>  | 3649(3)  | 3069(4)  | 5090(3)  | 51.6(14) |
| N <sub>4A</sub>  | 5214(3)  | 1771(4)  | 9804(3)  | 49.6(14) |
| N <sub>5A</sub>  | 6784(4)  | 1039(6)  | 11601(4) | 83(2)    |
| N <sub>6A</sub>  | 6155(3)  | 1892(4)  | 10965(3) | 57.5(16) |
| N <sub>1B</sub>  | 5256(11) | 2769(13) | 4175(11) | 48(4)    |
| N <sub>2B</sub>  | 6108(10) | 2669(11) | 3780(11) | 60(4)    |
| N <sub>3B</sub>  | 5135(3)  | 3527(4)  | 5208(3)  | 51.1(14) |
| N <sub>1B'</sub> | 5057(12) | 2611(16) | 4139(13) | 67(6)    |
| N <sub>2B'</sub> | 5802(11) | 2410(11) | 3593(8)  | 64(4)    |
| C <sub>1</sub>   | 3183(11) | 1359(16) | 7290(8)  | 76(7)    |
| C <sub>3</sub>   | 4705(7)  | 1811(10) | 9185(4)  | 46(5)    |
| C <sub>5</sub>   | 4848(4)  | 1867(7)  | 8583(4)  | 48(3)    |
| C <sub>6</sub>   | 4337(5)  | 1867(8)  | 7991(4)  | 55(4)    |
| C <sub>12A</sub> | 3684(4)  | 1812(8)  | 8001(5)  | 47(4)    |
| C <sub>7</sub>   | 3541(5)  | 1756(11) | 8603(7)  | 48(5)    |
| C <sub>8</sub>   | 4052(8)  | 1756(12) | 9195(5)  | 50(5)    |
| C <sub>1A</sub>  | 3848(6)  | 4061(7)  | 3468(4)  | 85(3)    |
| C <sub>2A</sub>  | 3144(5)  | 4628(6)  | 3883(5)  | 80(3)    |
| C <sub>3A</sub>  | 3427(4)  | 4021(5)  | 4271(4)  | 63(2)    |
| C <sub>4A</sub>  | 3314(4)  | 3674(5)  | 4850(4)  | 62(2)    |
| C <sub>7A</sub>  | 3339(9)  | 2925(8)  | 6713(8)  | 50(4)    |
| C <sub>8A</sub>  | 3240(10) | 2137(8)  | 6735(7)  | 45(4)    |
| C <sub>9A</sub>  | 3288(12) | 1672(10) | 6215(9)  | 48(4)    |
| C <sub>9</sub>   | 3435(16) | 1996(14) | 5671(10) | 50(6)    |
| C <sub>5A</sub>  | 3534(15) | 2785(14) | 5649(9)  | 47(5)    |
| C <sub>6A</sub>  | 3486(10) | 3249(10) | 6170(9)  | 47(4)    |
| C <sub>11A</sub> | 3112(8)  | 1756(12) | 7365(7)  | 52(5)    |
| C <sub>15A</sub> | 4700(7)  | 1641(11) | 9178(4)  | 45(5)    |
| C <sub>16A</sub> | 4854(5)  | 1305(9)  | 8643(5)  | 69(5)    |
| C <sub>17A</sub> | 4368(6)  | 1227(9)  | 8038(5)  | 73(4)    |
| C <sub>2</sub>   | 3729(5)  | 1485(9)  | 7967(5)  | 62(5)    |
| C <sub>13A</sub> | 3575(6)  | 1821(11) | 8502(7)  | 48(4)    |
| C <sub>14A</sub> | 4060(8)  | 1899(12) | 9108(6)  | 47(4)    |
| C <sub>18A</sub> | 5456(4)  | 1135(5)  | 10076(3) | 56.7(19) |
| C <sub>19A</sub> | 5976(4)  | 1179(5)  | 10699(3) | 57.1(19) |
| C <sub>20A</sub> | 6377(5)  | 637(6)   | 11100(4) | 79(3)    |
| C <sub>21A</sub> | 6644(4)  | 1777(6)  | 11520(4) | 70(2)    |
| C <sub>7A'</sub> | 3437(11) | 2607(9)  | 6793(8)  | 63(5)    |
| C <sub>8A'</sub> | 3327(10) | 1818(9)  | 6738(9)  | 54(5)    |

|                  |          |           |           |          |
|------------------|----------|-----------|-----------|----------|
| C <sub>9A'</sub> | 3314(12) | 1440(11)  | 6153(11)  | 55(5)    |
| C <sub>10A</sub> | 3411(17) | 1850(16)  | 5623(10)  | 59(6)    |
| C <sub>5A'</sub> | 3522(17) | 2639(16)  | 5678(9)   | 55(6)    |
| C <sub>6A'</sub> | 3535(13) | 3017(10)  | 6263(10)  | 67(6)    |
| C <sub>1B</sub>  | 5476(13) | 2467(13)  | 3712(11)  | 61(4)    |
| C <sub>2B</sub>  | 6314(11) | 3109(11)  | 4312(11)  | 57(4)    |
| C <sub>3B</sub>  | 5793(11) | 3182(13)  | 4578(11)  | 47(4)    |
| C <sub>4B</sub>  | 5680(20) | 3630(20)  | 5132(18)  | 66(9)    |
| C <sub>5B</sub>  | 5108(3)  | 3948(4)   | 5789(4)   | 49.8(16) |
| C <sub>6B</sub>  | 4680(4)  | 4571(4)   | 5716(4)   | 52.9(17) |
| C <sub>7B</sub>  | 4646(4)  | 4971(4)   | 6279(4)   | 51.4(17) |
| C <sub>8B</sub>  | 5027(4)  | 4764(4)   | 6908(4)   | 54.2(17) |
| C <sub>9B</sub>  | 5440(5)  | 4148(5)   | 6959(4)   | 70(2)    |
| C <sub>10B</sub> | 5487(4)  | 3742(5)   | 6412(4)   | 68(2)    |
| C <sub>11B</sub> | 5000     | 5234(6)   | 7500      | 64(3)    |
| C <sub>1B'</sub> | 5183(12) | 2265(14)  | 3629(11)  | 69(5)    |
| C <sub>2B'</sub> | 6089(12) | 2893(14)  | 4051(11)  | 62(5)    |
| C <sub>3B'</sub> | 5641(17) | 3023(16)  | 4398(12)  | 60(6)    |
| C <sub>4C</sub>  | 5689(14) | 3473(19)  | 5003(17)  | 43(5)    |
| F <sub>1</sub>   | 3220(50) | 6120(20)  | 6700(40)  | 190(40)  |
| F <sub>3</sub>   | 2589(12) | 5591(15)  | 6015(10)  | 77(7)    |
| F <sub>10</sub>  | 3280(20) | 4653(15)  | 6580(20)  | 125(12)  |
| F <sub>00X</sub> | 2514(12) | 5252(14)  | 7000(12)  | 51(6)    |
| B <sub>01B</sub> | 2995(5)  | 5359(6)   | 6637(5)   | 82(3)    |
| F <sub>002</sub> | 7305(3)  | 3772(4)   | 7071(2)   | 83.7(16) |
| F <sub>003</sub> | 8042(3)  | 2906(3)   | 6903(3)   | 93.2(18) |
| F <sub>008</sub> | 7246(3)  | 3416(4)   | 6032(3)   | 104(2)   |
| F <sub>00A</sub> | 8087(3)  | 4157(4)   | 6617(4)   | 108(2)   |
| B <sub>01A</sub> | 7666(5)  | 3561(7)   | 6663(5)   | 69(3)    |
| F <sub>009</sub> | 3272(4)  | 4763(4)   | 7040(3)   | 81.0(19) |
| F <sub>00H</sub> | 3414(7)  | 5982(7)   | 6871(5)   | 117(5)   |
| F <sub>00T</sub> | 3011(5)  | 5125(6)   | 5993(3)   | 112(3)   |
| F <sub>00Y</sub> | 2390(4)  | 5519(6)   | 6675(7)   | 138(5)   |
| B <sub>01C</sub> | 2995(5)  | 5359(6)   | 6637(5)   | 82(3)    |
| N <sub>2</sub>   | 4363(9)  | 431(10)   | 10769(9)  | 88(5)    |
| C <sub>1AA</sub> | 3917(11) | 562(12)   | 10514(11) | 29(4)    |
| C <sub>2AA</sub> | 3289(12) | 724(14)   | 10206(13) | 40(5)    |
| N <sub>01L</sub> | 5516(9)  | -1381(10) | 7422(10)  | 33(4)    |
| C <sub>4</sub>   | 5777(17) | 31(17)    | 7357(17)  | 61(7)    |
| C <sub>0AA</sub> | 5601(12) | -806(13)  | 7390(12)  | 35(5)    |

Table 3 Anisotropic Displacement Parameters ( $\text{\AA}^2 \times 10^3$ ) for **1**. The Anisotropic displacement factor exponent takes the form:  $-2\pi^2[h^2a^{*2}U_{11}+2hka^*b^*U_{12}+\dots]$ .

| Atom | U <sub>11</sub> | U <sub>22</sub> | U <sub>33</sub> | U <sub>23</sub> | U <sub>13</sub> | U <sub>12</sub> |
|------|-----------------|-----------------|-----------------|-----------------|-----------------|-----------------|
| Fe01 | 50.8(6)         | 72.7(7)         | 26.7(5)         | 0.8(4)          | 8.5(5)          | 0.8(5)          |
| N1A  | 63(4)           | 92(5)           | 34(3)           | 0(3)            | 6(4)            | -13(4)          |
| N2A  | 79(6)           | 120(7)          | 46(4)           | 27(4)           | -9(5)           | -27(5)          |
| N3A  | 45(3)           | 78(4)           | 28(3)           | 1(3)            | 4(3)            | -8(3)           |
| N4A  | 43(3)           | 77(4)           | 26(3)           | 1(3)            | 6(3)            | 5(3)            |
| N5A  | 74(5)           | 123(7)          | 43(4)           | 17(4)           | 4(4)            | 34(5)           |
| N6A  | 46(3)           | 86(4)           | 35(3)           | 0(3)            | 3(3)            | -5(3)           |
| N1B  | 58(9)           | 59(8)           | 36(7)           | 13(6)           | 28(7)           | 12(6)           |
| N2B  | 67(8)           | 70(10)          | 56(9)           | -1(7)           | 38(8)           | 9(6)            |
| N3B  | 41(3)           | 71(4)           | 46(4)           | 12(3)           | 20(3)           | 11(3)           |
| N1B' | 73(10)          | 88(13)          | 43(8)           | 6(7)            | 21(8)           | 6(7)            |
| N2B' | 74(10)          | 80(10)          | 43(7)           | -4(7)           | 24(8)           | 2(7)            |
| C1   | 66(9)           | 130(20)         | 30(7)           | -7(8)           | 11(6)           | -29(10)         |
| C3   | 50(11)          | 62(11)          | 20(8)           | -4(6)           | 0(8)            | 1(8)            |
| C5   | 38(6)           | 85(10)          | 19(5)           | -3(6)           | 3(5)            | -9(6)           |
| C6   | 42(5)           | 102(11)         | 16(5)           | 1(5)            | 2(4)            | -11(5)          |
| C12A | 39(5)           | 72(12)          | 28(6)           | -1(5)           | 5(4)            | -12(5)          |
| C7   | 50(8)           | 66(12)          | 29(6)           | 3(5)            | 10(5)           | -10(7)          |
| C8   | 48(9)           | 69(12)          | 32(6)           | 1(6)            | 11(6)           | -6(7)           |
| C1A  | 91(7)           | 117(8)          | 40(5)           | 9(5)            | 9(5)            | -27(7)          |
| C2A  | 62(5)           | 90(6)           | 69(6)           | 13(5)           | -12(5)          | -10(5)          |
| C3A  | 55(5)           | 76(5)           | 48(5)           | 10(4)           | -1(4)           | -3(4)           |
| C4A  | 46(4)           | 82(5)           | 48(5)           | -3(4)           | -1(4)           | 2(4)            |
| C7A  | 46(8)           | 70(10)          | 35(7)           | 8(6)            | 15(7)           | 2(7)            |
| C8A  | 35(8)           | 71(10)          | 29(6)           | 8(6)            | 9(6)            | 3(7)            |
| C9A  | 43(10)          | 71(10)          | 30(7)           | 8(6)            | 10(6)           | 2(7)            |
| C9   | 48(15)          | 71(9)           | 32(8)           | 7(5)            | 14(9)           | 7(7)            |
| C5A  | 44(13)          | 70(9)           | 31(7)           | 9(5)            | 17(8)           | 4(7)            |
| C6A  | 41(9)           | 71(9)           | 33(7)           | 10(6)           | 14(6)           | 0(7)            |
| C11A | 37(6)           | 101(16)         | 17(5)           | -4(6)           | 5(5)            | -21(7)          |
| C15A | 42(8)           | 71(10)          | 21(7)           | 1(5)            | 5(6)            | -6(6)           |
| C16A | 47(7)           | 124(13)         | 36(6)           | -21(7)          | 13(5)           | -11(7)          |
| C17A | 59(6)           | 127(13)         | 32(6)           | -16(7)          | 10(5)           | -20(7)          |
| C2   | 54(6)           | 96(13)          | 36(6)           | -8(6)           | 11(5)           | -29(6)          |
| C13A | 46(7)           | 69(10)          | 23(6)           | 11(5)           | 1(5)            | -16(6)          |
| C14A | 44(8)           | 65(10)          | 28(6)           | 3(6)            | 6(5)            | -8(6)           |

|      |         |        |         |        |        |        |
|------|---------|--------|---------|--------|--------|--------|
| C18A | 66(5)   | 72(5)  | 26(3)   | -4(3)  | 4(4)   | -4(4)  |
| C19A | 62(5)   | 75(5)  | 29(4)   | 3(3)   | 6(4)   | 9(4)   |
| C20A | 85(7)   | 98(7)  | 37(4)   | 5(4)   | -9(5)  | 25(5)  |
| C21A | 57(5)   | 108(7) | 41(5)   | 2(4)   | 5(5)   | -7(5)  |
| C7A' | 72(13)  | 83(12) | 27(7)   | 5(7)   | 4(8)   | -10(9) |
| C8A' | 35(9)   | 79(11) | 38(7)   | 9(7)   | -5(6)  | -7(8)  |
| C9A' | 36(10)  | 84(12) | 38(7)   | 5(7)   | 1(7)   | -8(8)  |
| C10A | 43(14)  | 86(12) | 43(8)   | 2(6)   | 5(8)   | -14(9) |
| C5A' | 45(14)  | 86(12) | 25(7)   | 4(6)   | -4(8)  | -14(9) |
| C6A' | 74(15)  | 86(12) | 31(7)   | 5(7)   | 3(9)   | -13(9) |
| C1B  | 66(9)   | 79(10) | 50(8)   | 1(7)   | 38(8)  | 5(7)   |
| C2B  | 61(8)   | 65(9)  | 57(9)   | 2(7)   | 37(7)  | 12(6)  |
| C3B  | 53(8)   | 55(9)  | 41(8)   | 11(6)  | 26(7)  | 15(6)  |
| C4B  | 100(20) | 56(16) | 56(14)  | 5(10)  | 41(13) | 32(12) |
| C5B  | 44(4)   | 56(4)  | 53(4)   | 5(3)   | 18(4)  | -2(3)  |
| C6B  | 45(4)   | 65(4)  | 47(4)   | 8(3)   | 11(4)  | 5(3)   |
| C7B  | 45(4)   | 54(4)  | 52(4)   | 4(3)   | 10(4)  | 3(3)   |
| C8B  | 60(5)   | 55(4)  | 40(4)   | 1(3)   | 3(4)   | -4(3)  |
| C9B  | 81(6)   | 68(5)  | 39(4)   | -1(3)  | -17(5) | 13(4)  |
| C10B | 65(5)   | 64(5)  | 63(5)   | -2(4)  | 1(5)   | 19(4)  |
| C11B | 86(9)   | 55(6)  | 43(6)   | 0      | 5(6)   | 0      |
| C1B' | 73(10)  | 90(11) | 45(7)   | 2(7)   | 21(7)  | 2(8)   |
| C2B' | 68(9)   | 78(11) | 42(10)  | -3(8)  | 21(8)  | 7(7)   |
| C3B' | 67(11)  | 78(12) | 38(10)  | 6(8)   | 21(8)  | 15(8)  |
| C4C  | 36(9)   | 44(14) | 65(14)  | 1(8)   | 38(10) | 2(8)   |
| B01B | 88(8)   | 88(8)  | 58(7)   | 6(5)   | 3(7)   | -15(6) |
| F002 | 64(3)   | 138(5) | 48(3)   | 2(3)   | 14(3)  | 28(3)  |
| F003 | 101(4)  | 117(4) | 72(4)   | 19(3)  | 41(3)  | 42(3)  |
| F008 | 117(5)  | 146(5) | 41(3)   | 4(3)   | 12(3)  | 12(4)  |
| F00A | 76(4)   | 124(5) | 115(5)  | 37(4)  | 14(4)  | 4(4)   |
| B01A | 59(6)   | 101(8) | 46(5)   | 9(5)   | 16(5)  | 16(5)  |
| F009 | 96(5)   | 97(5)  | 50(4)   | 0(3)   | 21(4)  | 24(4)  |
| F00H | 136(9)  | 138(8) | 60(5)   | 8(5)   | 2(6)   | -83(7) |
| F00T | 117(7)  | 155(7) | 52(4)   | 3(4)   | 7(5)   | 27(6)  |
| F00Y | 56(4)   | 110(7) | 229(15) | -77(8) | 10(7)  | 19(4)  |
| B01C | 88(8)   | 88(8)  | 58(7)   | 6(5)   | 3(7)   | -15(6) |

Table 4 Bond Lengths for 1.

Atom Atom Length/Å Atom Atom Length/Å

|      |                   |           |      |                  |           |
|------|-------------------|-----------|------|------------------|-----------|
| Fe01 | N1A               | 2.086(7)  | C8A  | C9A              | 1.3900    |
| Fe01 | N3A               | 2.183(6)  | C8A  | C11A             | 1.57(2)   |
| Fe01 | N4A <sup>1</sup>  | 2.164(6)  | C9A  | C9               | 1.3900    |
| Fe01 | N6A <sup>1</sup>  | 2.085(7)  | C9   | C5A              | 1.3900    |
| Fe01 | N1B               | 2.250(17) | C5A  | C6A              | 1.3900    |
| Fe01 | N3B               | 2.142(7)  | C15A | C16A             | 1.3900    |
| Fe01 | N1B'              | 1.94(2)   | C15A | C14A             | 1.3900    |
| N1A  | C1A               | 1.320(11) | C16A | C17A             | 1.3900    |
| N1A  | C3A               | 1.381(11) | C17A | C2               | 1.3900    |
| N2A  | C1A               | 1.341(14) | C2   | C13A             | 1.3900    |
| N2A  | C2A               | 1.371(13) | C13A | C14A             | 1.3900    |
| N3A  | C4A               | 1.286(10) | C18A | C19A             | 1.447(11) |
| N3A  | C5A               | 1.363(14) | C19A | C20A             | 1.380(11) |
| N3A  | C5A'              | 1.537(17) | C7A' | C8A'             | 1.3900    |
| N4A  | Fe01 <sup>1</sup> | 2.164(6)  | C7A' | C6A'             | 1.3900    |
| N4A  | C3                | 1.429(10) | C8A' | C9A'             | 1.3900    |
| N4A  | C15A              | 1.461(11) | C9A' | C10A             | 1.3900    |
| N4A  | C18A              | 1.282(10) | C10A | C5A'             | 1.3900    |
| N5A  | C20A              | 1.345(13) | C5A' | C6A'             | 1.3900    |
| N5A  | C21A              | 1.317(12) | C2B  | C3B              | 1.38(2)   |
| N6A  | Fe01 <sup>1</sup> | 2.085(7)  | C3B  | C4B              | 1.48(3)   |
| N6A  | C19A              | 1.367(10) | C5B  | C6B              | 1.390(10) |
| N6A  | C21A              | 1.330(11) | C5B  | C10B             | 1.371(11) |
| N1B  | C1B               | 1.31(2)   | C6B  | C7B              | 1.395(10) |
| N1B  | C3B               | 1.40(3)   | C7B  | C8B              | 1.384(10) |
| N2B  | C1B               | 1.35(3)   | C8B  | C9B              | 1.366(11) |
| N2B  | C2B               | 1.32(3)   | C8B  | C11B             | 1.505(9)  |
| N3B  | C4B               | 1.22(4)   | C9B  | C10B             | 1.379(12) |
| N3B  | C5B               | 1.442(9)  | C11B | C8B <sup>1</sup> | 1.505(9)  |
| N3B  | C4C               | 1.36(2)   | C2B' | C3B'             | 1.37(3)   |
| N1B' | C1B'              | 1.33(3)   | C3B' | C4C              | 1.47(3)   |
| N1B' | C3B'              | 1.39(3)   | F1   | B01B             | 1.39(2)   |
| N2B' | C1B'              | 1.36(3)   | F3   | B01B             | 1.400(17) |
| N2B' | C2B'              | 1.29(3)   | F10  | B01B             | 1.389(19) |
| C1   | C2                | 1.567(16) | F00X | B01B             | 1.452(17) |
| C1   | C8A'              | 1.51(3)   | F002 | B01A             | 1.356(10) |
| C3   | C5                | 1.3900    | F003 | B01A             | 1.396(12) |
| C3   | C8                | 1.3900    | F008 | B01A             | 1.389(12) |
| C5   | C6                | 1.3900    | F00A | B01A             | 1.389(13) |
| C6   | C12A              | 1.3900    | F009 | B01C             | 1.359(11) |
| C12A | C7                | 1.3900    | F00H | B01C             | 1.393(12) |



|      |      |           |      |      |           |
|------|------|-----------|------|------|-----------|
| C12A | C11A | 1.523(15) | F00T | B01C | 1.426(11) |
| C7   | C8   | 1.3900    | F00Y | B01C | 1.333(12) |
| C2A  | C3A  | 1.362(12) | N2   | C1AA | 0.97(2)   |
| C3A  | C4A  | 1.442(11) | C1AA | C2AA | 1.32(3)   |
| C7A  | C8A  | 1.3900    | N01L | C0AA | 1.02(3)   |
| C7A  | C6A  | 1.3900    | C4   | C0AA | 1.51(4)   |

 $^1\text{I-X,}+\text{Y,}3/2\text{-Z}$ 

Table 5 Bond Angles for 1.

| Atom             | Atom | Atom             | Angle/°   | Atom | Atom | Atom | Angle/°   |
|------------------|------|------------------|-----------|------|------|------|-----------|
| N1A              | Fe01 | N3A              | 77.4(2)   | N3A  | C5A  | C9   | 117.0(15) |
| N1A              | Fe01 | N4A <sup>1</sup> | 171.2(2)  | N3A  | C5A  | C6A  | 122.9(15) |
| N1A              | Fe01 | N1B              | 96.1(6)   | C6A  | C5A  | C9   | 120.0     |
| N1A              | Fe01 | N3B              | 93.7(3)   | C5A  | C6A  | C7A  | 120.0     |
| N3A              | Fe01 | N1B              | 166.0(6)  | C12A | C11A | C8A  | 115.3(14) |
| N4A <sup>1</sup> | Fe01 | N3A              | 97.0(2)   | C16A | C15A | N4A  | 120.6(9)  |
| N4A <sup>1</sup> | Fe01 | N1B              | 90.8(6)   | C16A | C15A | C14A | 120.0     |
| N6A <sup>1</sup> | Fe01 | N1A              | 95.6(3)   | C14A | C15A | N4A  | 119.3(9)  |
| N6A <sup>1</sup> | Fe01 | N3A              | 94.6(2)   | C15A | C16A | C17A | 120.0     |
| N6A <sup>1</sup> | Fe01 | N4A <sup>1</sup> | 77.8(2)   | C2   | C17A | C16A | 120.0     |
| N6A <sup>1</sup> | Fe01 | N1B              | 98.4(6)   | C17A | C2   | C1   | 119.1(12) |
| N6A <sup>1</sup> | Fe01 | N3B              | 168.1(2)  | C13A | C2   | C1   | 120.9(12) |
| N3B              | Fe01 | N3A              | 94.6(2)   | C13A | C2   | C17A | 120.0     |
| N3B              | Fe01 | N4A <sup>1</sup> | 93.6(2)   | C14A | C13A | C2   | 120.0     |
| N3B              | Fe01 | N1B              | 73.2(6)   | C13A | C14A | C15A | 120.0     |
| N1B'             | Fe01 | N1A              | 97.8(9)   | N4A  | C18A | C19A | 117.2(7)  |
| N1B'             | Fe01 | N3A              | 174.7(9)  | N6A  | C19A | C18A | 117.8(7)  |
| N1B'             | Fe01 | N4A <sup>1</sup> | 88.0(9)   | N6A  | C19A | C20A | 108.8(8)  |
| N1B'             | Fe01 | N6A <sup>1</sup> | 88.0(7)   | C20A | C19A | C18A | 133.4(8)  |
| N1B'             | Fe01 | N3B              | 83.5(7)   | N5A  | C20A | C19A | 105.3(9)  |
| C1A              | N1A  | Fe01             | 142.2(8)  | N5A  | C21A | N6A  | 110.4(9)  |
| C1A              | N1A  | C3A              | 104.2(8)  | C8A' | C7A' | C6A' | 120.0     |
| C3A              | N1A  | Fe01             | 113.5(5)  | C7A' | C8A' | C1   | 121.5(14) |
| C1A              | N2A  | C2A              | 106.3(8)  | C7A' | C8A' | C9A' | 120.0     |
| C4A              | N3A  | Fe01             | 113.5(5)  | C9A' | C8A' | C1   | 118.4(14) |
| C4A              | N3A  | C5A              | 114.8(13) | C10A | C9A' | C8A' | 120.0     |
| C4A              | N3A  | C5A'             | 120.6(13) | C9A' | C10A | C5A' | 120.0     |
| C5A              | N3A  | Fe01             | 131.1(13) | C10A | C5A' | N3A  | 118.5(15) |
| C5A'             | N3A  | Fe01             | 125.9(13) | C6A' | C5A' | N3A  | 121.4(15) |

|      |      |                   |           |                  |      |      |           |
|------|------|-------------------|-----------|------------------|------|------|-----------|
| C3   | N4A  | Fe01 <sup>1</sup> | 123.0(8)  | C6A'             | C5A' | C10A | 120.0     |
| C15A | N4A  | Fe01 <sup>1</sup> | 134.6(8)  | C5A'             | C6A' | C7A' | 120.0     |
| C18A | N4A  | Fe01 <sup>1</sup> | 113.9(5)  | N1B              | C1B  | N2B  | 112(2)    |
| C18A | N4A  | C3                | 123.0(9)  | N2B              | C2B  | C3B  | 107.1(18) |
| C18A | N4A  | C15A              | 111.3(9)  | N1B              | C3B  | C4B  | 117(2)    |
| C21A | N5A  | C20A              | 109.7(8)  | C2B              | C3B  | N1B  | 108.0(17) |
| C19A | N6A  | Fe01 <sup>1</sup> | 113.1(5)  | C2B              | C3B  | C4B  | 135(3)    |
| C21A | N6A  | Fe01 <sup>1</sup> | 141.0(7)  | N3B              | C4B  | C3B  | 114(3)    |
| C21A | N6A  | C19A              | 106.0(7)  | C6B              | C5B  | N3B  | 119.1(7)  |
| C1B  | N1B  | Fe01              | 143.8(19) | C10B             | C5B  | N3B  | 121.6(7)  |
| C1B  | N1B  | C3B               | 104.8(18) | C10B             | C5B  | C6B  | 119.3(7)  |
| C3B  | N1B  | Fe01              | 111.0(13) | C5B              | C6B  | C7B  | 119.2(7)  |
| C2B  | N2B  | C1B               | 108.1(17) | C8B              | C7B  | C6B  | 121.7(7)  |
| C4B  | N3B  | Fe01              | 124.2(15) | C7B              | C8B  | C11B | 120.0(7)  |
| C4B  | N3B  | C5B               | 108.0(15) | C9B              | C8B  | C7B  | 117.3(7)  |
| C5B  | N3B  | Fe01              | 127.7(4)  | C9B              | C8B  | C11B | 122.6(7)  |
| C4C  | N3B  | Fe01              | 108.2(12) | C8B              | C9B  | C10B | 122.4(8)  |
| C4C  | N3B  | C5B               | 123.6(13) | C5B              | C10B | C9B  | 120.1(7)  |
| C1B' | N1B' | Fe01              | 145.1(19) | C8B <sup>1</sup> | C11B | C8B  | 114.3(9)  |
| C1B' | N1B' | C3B'              | 100.7(19) | N1B'             | C1B' | N2B' | 113(2)    |
| C3B' | N1B' | Fe01              | 114.2(17) | N2B'             | C2B' | C3B' | 105(2)    |
| C2B' | N2B' | C1B'              | 109.2(19) | N1B'             | C3B' | C4C  | 116(2)    |
| C8A' | C1   | C2                | 111.4(17) | C2B'             | C3B' | N1B' | 112(2)    |
| C5   | C3   | N4A               | 122.0(9)  | C2B'             | C3B' | C4C  | 132(3)    |
| C5   | C3   | C8                | 120.0     | N3B              | C4C  | C3B' | 117(2)    |
| C8   | C3   | N4A               | 117.9(9)  | F1               | B01B | F3   | 85(4)     |
| C6   | C5   | C3                | 120.0     | F1               | B01B | F00X | 110(4)    |
| C5   | C6   | C12A              | 120.0     | F3               | B01B | F00X | 101.5(16) |
| C6   | C12A | C11A              | 121.8(10) | F10              | B01B | F1   | 134(5)    |
| C7   | C12A | C6                | 120.0     | F10              | B01B | F3   | 110(2)    |
| C7   | C12A | C11A              | 118.1(10) | F10              | B01B | F00X | 109(2)    |
| C12A | C7   | C8                | 120.0     | F002             | B01A | F003 | 111.0(7)  |
| C7   | C8   | C3                | 120.0     | F002             | B01A | F008 | 109.5(8)  |
| N1A  | C1A  | N2A               | 113.2(9)  | F002             | B01A | F00A | 109.5(9)  |
| C3A  | C2A  | N2A               | 106.4(9)  | F008             | B01A | F003 | 109.7(9)  |
| N1A  | C3A  | C4A               | 117.0(7)  | F00A             | B01A | F003 | 109.1(8)  |
| C2A  | C3A  | N1A               | 110.0(8)  | F00A             | B01A | F008 | 108.1(8)  |
| C2A  | C3A  | C4A               | 132.9(9)  | F009             | B01C | F00H | 105.0(10) |
| N3A  | C4A  | C3A               | 117.8(7)  | F009             | B01C | F00T | 104.5(8)  |
| C8A  | C7A  | C6A               | 120.0     | F00H             | B01C | F00T | 111.6(9)  |
| C7A  | C8A  | C11A              | 120.5(11) | F00Y             | B01C | F009 | 111.5(10) |

|     |     |      |           |      |      |      |           |
|-----|-----|------|-----------|------|------|------|-----------|
| C9A | C8A | C7A  | 120.0     | F00Y | B01C | F00H | 109.7(11) |
| C9A | C8A | C11A | 119.4(11) | F00Y | B01C | F00T | 114.0(10) |
| C8A | C9A | C9   | 120.0     | N2   | C1AA | C2AA | 175(3)    |
| C5A | C9  | C9A  | 120.0     | N01L | C0AA | C4   | 176(3)    |

 $^11\text{-X}_5+\text{Y}_3/2\text{-Z}$ 
Table 6 Hydrogen Bonds for **1**.

| D    | H    | A                 | d(D-H)/Å | d(H-A)/Å | d(D-A)/Å  | D-H-A/° |
|------|------|-------------------|----------|----------|-----------|---------|
| N5A  | H5A  | F00X <sup>1</sup> | 0.86     | 2.09     | 2.71(3)   | 128.8   |
| N2B  | H2B  | F003 <sup>2</sup> | 0.86     | 1.95     | 2.795(18) | 167.7   |
| C2AA | H2AB | F3 <sup>3</sup>   | 0.96     | 2.00     | 2.71(3)   | 128.4   |

 $^11/2+\text{X}_1,1/2\text{-Y}_1,1/2+\text{Z}_1; ^23/2\text{-X}_1,1/2\text{-Y}_1,1\text{-Z}_1; ^31/2\text{-X}_1,-1/2+\text{Y}_1,3/2\text{-Z}_1$ 
Table 7 Hydrogen Atom Coordinates ( $\text{\AA}\times 10^4$ ) and Isotropic Displacement Parameters ( $\text{\AA}^2\times 10^3$ ) for **1**.

| Atom | x    | y    | z     | U(eq) |
|------|------|------|-------|-------|
| H2A  | 3330 | 4970 | 3044  | 105   |
| H5A  | 7090 | 843  | 11924 | 99    |
| H2B  | 6338 | 2535 | 3522  | 72    |
| H2B' | 5975 | 2211 | 3309  | 77    |
| H1A  | 3159 | 817  | 7177  | 91    |
| H1B  | 2756 | 1512 | 7335  | 91    |
| H5   | 5285 | 1904 | 8576  | 58    |
| H6   | 4433 | 1905 | 7589  | 65    |
| H7   | 3104 | 1718 | 8610  | 58    |
| H8   | 3956 | 1718 | 9598  | 59    |
| H1AA | 4097 | 3944 | 3183  | 102   |
| H2AA | 2828 | 4964 | 3953  | 97    |
| H4A  | 3009 | 3881 | 5044  | 74    |
| H7A  | 3306 | 3236 | 7061  | 60    |
| H9A  | 3222 | 1144 | 6230  | 58    |
| H9   | 3468 | 1685 | 5323  | 60    |
| H6A  | 3551 | 3777 | 6154  | 57    |
| H11A | 2727 | 1997 | 7441  | 63    |
| H11B | 3008 | 1217 | 7270  | 63    |
| H16A | 5282 | 1132 | 8690  | 83    |
| H17A | 4471 | 1002 | 7680  | 88    |

|                  |      |      |       |    |
|------------------|------|------|-------|----|
| H <sub>13A</sub> | 3147 | 1994 | 8455  | 58 |
| H <sub>14A</sub> | 3957 | 2124 | 9466  | 56 |
| H <sub>18A</sub> | 5304 | 664  | 9881  | 68 |
| H <sub>20A</sub> | 6368 | 107  | 11038 | 95 |
| H <sub>21A</sub> | 6856 | 2163 | 11809 | 84 |
| H <sub>7A'</sub> | 3446 | 2860 | 7184  | 75 |
| H <sub>9A'</sub> | 3240 | 912  | 6116  | 66 |
| H <sub>10A</sub> | 3403 | 1597 | 5232  | 71 |
| H <sub>6A'</sub> | 3608 | 3544 | 6300  | 80 |
| H <sub>1BA</sub> | 5227 | 2151 | 3375  | 73 |
| H <sub>2BA</sub> | 6731 | 3328 | 4477  | 68 |
| H <sub>4B</sub>  | 5991 | 3964 | 5396  | 79 |
| H <sub>6B</sub>  | 4419 | 4718 | 5296  | 63 |
| H <sub>7B</sub>  | 4360 | 5388 | 6229  | 62 |
| H <sub>9B</sub>  | 5698 | 3996 | 7378  | 84 |
| H <sub>10B</sub> | 5777 | 3328 | 6467  | 81 |
| H <sub>11C</sub> | 5387 | 5563 | 7630  | 77 |
| H <sub>11D</sub> | 4613 | 5563 | 7370  | 77 |
| H <sub>1B'</sub> | 4879 | 1957 | 3327  | 82 |
| H <sub>2BB</sub> | 6508 | 3107 | 4129  | 74 |
| H <sub>4C</sub>  | 6083 | 3710 | 5237  | 52 |
| H <sub>2AB</sub> | 3230 | 773  | 9738  | 60 |
| H <sub>2AC</sub> | 3170 | 1198 | 10374 | 60 |
| H <sub>2AD</sub> | 3013 | 317  | 10281 | 60 |
| H <sub>4D</sub>  | 5467 | 268  | 6981  | 92 |
| H <sub>4E</sub>  | 6215 | 72   | 7312  | 92 |
| H <sub>4F</sub>  | 5761 | 286  | 7756  | 92 |

Table 8 Atomic Occupancy for 1.

| Atom Occupancy   |     | Atom Occupancy   |     | Atom Occupancy   |     |
|------------------|-----|------------------|-----|------------------|-----|
| N <sub>1B</sub>  | 0.5 | N <sub>2B</sub>  | 0.5 | H <sub>2B</sub>  | 0.5 |
| N <sub>1B'</sub> | 0.5 | N <sub>2B'</sub> | 0.5 | H <sub>2B'</sub> | 0.5 |
| C <sub>1</sub>   | 0.5 | H <sub>1A</sub>  | 0.5 | H <sub>1B</sub>  | 0.5 |
| C <sub>3</sub>   | 0.5 | C <sub>5</sub>   | 0.5 | H <sub>5</sub>   | 0.5 |
| C <sub>6</sub>   | 0.5 | H <sub>6</sub>   | 0.5 | C <sub>12A</sub> | 0.5 |
| C <sub>7</sub>   | 0.5 | H <sub>7</sub>   | 0.5 | C <sub>8</sub>   | 0.5 |
| H <sub>8</sub>   | 0.5 | C <sub>7A</sub>  | 0.5 | H <sub>7A</sub>  | 0.5 |
| C <sub>8A</sub>  | 0.5 | C <sub>9A</sub>  | 0.5 | H <sub>9A</sub>  | 0.5 |
| C <sub>9</sub>   | 0.5 | H <sub>9</sub>   | 0.5 | C <sub>5A</sub>  | 0.5 |

|                  |      |                  |      |                  |      |
|------------------|------|------------------|------|------------------|------|
| C <sub>6A</sub>  | 0.5  | H <sub>6A</sub>  | 0.5  | C <sub>11A</sub> | 0.5  |
| H <sub>11A</sub> | 0.5  | H <sub>11B</sub> | 0.5  | C <sub>15A</sub> | 0.5  |
| C <sub>16A</sub> | 0.5  | H <sub>16A</sub> | 0.5  | C <sub>17A</sub> | 0.5  |
| H <sub>17A</sub> | 0.5  | C <sub>2</sub>   | 0.5  | C <sub>13A</sub> | 0.5  |
| H <sub>13A</sub> | 0.5  | C <sub>14A</sub> | 0.5  | H <sub>14A</sub> | 0.5  |
| C <sub>7A'</sub> | 0.5  | H <sub>7A'</sub> | 0.5  | C <sub>8A'</sub> | 0.5  |
| C <sub>9A'</sub> | 0.5  | H <sub>9A'</sub> | 0.5  | C <sub>10A</sub> | 0.5  |
| H <sub>10A</sub> | 0.5  | C <sub>5A'</sub> | 0.5  | C <sub>6A'</sub> | 0.5  |
| H <sub>6A'</sub> | 0.5  | C <sub>1B</sub>  | 0.5  | H <sub>1BA</sub> | 0.5  |
| C <sub>2B</sub>  | 0.5  | H <sub>2BA</sub> | 0.5  | C <sub>3B</sub>  | 0.5  |
| C <sub>4B</sub>  | 0.5  | H <sub>4B</sub>  | 0.5  | H <sub>11C</sub> | 0.5  |
| H <sub>11D</sub> | 0.5  | C <sub>1B'</sub> | 0.5  | H <sub>1B'</sub> | 0.5  |
| C <sub>2B'</sub> | 0.5  | H <sub>2BB</sub> | 0.5  | C <sub>3B'</sub> | 0.5  |
| C <sub>4C</sub>  | 0.5  | H <sub>4C</sub>  | 0.5  | F <sub>1</sub>   | 0.2  |
| F <sub>3</sub>   | 0.2  | F <sub>10</sub>  | 0.2  | F <sub>00X</sub> | 0.2  |
| B <sub>01B</sub> | 0.4  | F <sub>009</sub> | 0.8  | F <sub>00H</sub> | 0.8  |
| F <sub>00T</sub> | 0.8  | F <sub>00Y</sub> | 0.8  | B <sub>01C</sub> | 0.6  |
| N <sub>2</sub>   | 0.5  | C <sub>1AA</sub> | 0.25 | C <sub>2AA</sub> | 0.25 |
| H <sub>2AB</sub> | 0.25 | H <sub>2AC</sub> | 0.25 | H <sub>2AD</sub> | 0.25 |
| N <sub>01L</sub> | 0.25 | C <sub>4</sub>   | 0.25 | H <sub>4D</sub>  | 0.25 |
| H <sub>4E</sub>  | 0.25 | H <sub>4F</sub>  | 0.25 | C <sub>0AA</sub> | 0.25 |

## Experimental

Single crystals of C<sub>65</sub>H<sub>57</sub>B<sub>4</sub>F<sub>16</sub>Fe<sub>2</sub>N<sub>19.5</sub> **1** were crystallised using a diethyl ether vapour diffusion into acetonitrile. A suitable crystal was selected and [mounted in paraffin oil] on a 'Bruker APEX-II CCD' diffractometer. The crystal was kept at 100 K during data collection. Using Olex2 [1], the structure was solved with the ShelXT [2] structure solution program using Intrinsic Phasing and refined with the ShelXL [3] refinement package using Least Squares minimisation.

1. Dolomanov, O.V., Bourhis, L.J., Gildea, R.J., Howard, J.A.K. & Puschmann, H. (2009), J. Appl. Cryst. 42, 339-341.
2. Sheldrick, G.M. (2015). Acta Cryst. A71, 3-8.
3. Sheldrick, G.M. (2015). Acta Cryst. C71, 3-8.

## Crystal structure determination of **1**

**Crystal Data** for C<sub>65</sub>H<sub>57</sub>B<sub>4</sub>F<sub>16</sub>Fe<sub>2</sub>N<sub>19.5</sub> (*M* = 1570.24 g/mol): monoclinic, space group C2/c (no. 15), *a* = 21.131(4) Å, *b* = 17.391(4) Å, *c* = 21.069(4) Å, *β* = 107.00(3)°, *V* = 7404(3) Å<sup>3</sup>, *Z* = 4, *T* = 293(2) K, *μ*(MoK $\alpha$ ) = 0.486 mm<sup>-1</sup>, *D*<sub>calc</sub> = 1.409 g/cm<sup>3</sup>, 50460 reflections measured (3.09° ≤ 2 $\theta$  ≤ 52.998°), 6995 unique (*R*<sub>int</sub> = 0.0697, *R*<sub>sigma</sub> = 0.0341) which were used in all calculations. The final *R*<sub>1</sub> was 0.1035 (*I* > 2 $\sigma$ (*I*)) and *wR*<sub>2</sub> was 0.3220 (all data).

## Refinement model description

Number of restraints - 218, number of constraints - unknown.

#### Details:

##### 1. Fixed Uiso

At 1.2 times of:

All C(H) groups, All C(H,H) groups, All N(H) groups

At 1.5 times of:

All C(H,H,H) groups

##### 2. Shared sites

{B01C, B01B}

##### 3. Restrained distances

B01B-B01C

1.42 with sigma of 0.02

F00X-B01B = F00Y-B01C = F3-B01B = F009-B01C = F10-B01B = F00T-B01C = F00H-B01C = F1-B01B

1.39 with sigma of 0.02

C1-C2  $\approx$  C11A-C2

with sigma of 0.02

##### 4. Rigid bond restraints

C3B', C4C

with sigma for 1-2 distances of 0.01 and sigma for 1-3 distances of 0.01

##### 5. Uiso/Uanis restraints and constraints

Uanis(B01C) = Uanis(B01B)

##### 6. Rigid body (RIGU) restrains

N1B, N2B, N1B', N2B', C1B, C2B, C3B, C1B', C2B', C3B'

with sigma for 1-2 distances of 0.004 and sigma for 1-3 distances of 0.004  
F009, F00H, F00T, F00Y

with sigma for 1-2 distances of 0.004 and sigma for 1-3 distances of 0.004  
C1, C2, C5, C6, C7, C8, C11A, C12A, C13A, C14A, C15A, C16A, C17A

with sigma for 1-2 distances of 0.004 and sigma for 1-3 distances of 0.004  
C3, C15A

with sigma for 1-2 distances of 0.004 and sigma for 1-3 distances of 0.004  
C9, C5A, C6A, C7A, C8A, C9A, C10A, C5A', C6A', C7A', C8A', C9A'

with sigma for 1-2 distances of 0.004 and sigma for 1-3 distances of 0.004  
C4B, C4C

with sigma for 1-2 distances of 0.004 and sigma for 1-3 distances of 0.004

##### 7. Others

Fixed Sof: N1B(0.5) N2B(0.5) H2B(0.5) N1B'(0.5) N2B'(0.5) H2B'(0.5)

C1(0.5)

H1A(0.5) H1B(0.5) C3(0.5) C5(0.5) H5(0.5) C6(0.5) H6(0.5) C12A(0.5)

C7(0.5)

H7(0.5) C8(0.5) H8(0.5) C7A(0.5) H7A(0.5) C8A(0.5) C9A(0.5) H9A(0.5)

C9(0.5)

H9(0.5) C5A(0.5) C6A(0.5) H6A(0.5) C11A(0.5) H11A(0.5) H11B(0.5) C15A(0.5)

C16A(0.5) H16A(0.5) C17A(0.5) H17A(0.5) C2(0.5) C13A(0.5) H13A(0.5)

C14A(0.5)

H14A(0.5) C7A'(0.5) H7A'(0.5) C8A'(0.5) C9A'(0.5) H9A'(0.5) C10A(0.5)

H10A(0.5) C5A'(0.5) C6A'(0.5) H6A'(0.5) C1B(0.5) H1BA(0.5) C2B(0.5)

H2BA(0.5)

C3B(0.5) C4B(0.5) H4B(0.5) H11C(0.5) H11D(0.5) C1B'(0.5) H1B'(0.5)

C2B'(0.5)

H2BB(0.5) C3B'(0.5) C4C(0.5) H4C(0.5) F1(0.2) F3(0.2) F10(0.2) F00X(0.2)

B01B(0.4) F009(0.8) F00H(0.8) F00T(0.8) F00Y(0.8) B01C(0.6) N2(0.5)

C1AA(0.25)

C2AA(0.25) H2AB(0.25) H2AC(0.25) H2AD(0.25) N01L(0.25) C4(0.25) H4D(0.25)

H4E(0.25) H4F(0.25) C0AA(0.25)

##### 8.a Secondary CH2 refined with riding coordinates:

C1(H1A,H1B), C11A(H11A,H11B), C11B(H11C,H11D)

##### 8.b Aromatic/amide H refined with riding coordinates:

N2A(H2A), N5A(H5A), N2B(H2B), N2B'(H2B'), C5(H5), C6(H6), C7(H7), C8(H8),  
 C1A(H1AA), C2A(H2AA), C4A(H4A), C7A(H7A), C9A(H9A), C9(H9), C6A(H6A),  
 C16A(H16A), C17A(H17A), C13A(H13A), C14A(H14A), C18A(H18A), C20A(H20A),  
 C21A(H21A), C7A'(H7A'), C9A'(H9A'), C10A(H10A), C6A'(H6A'), C1B(H1BA),  
 C2B(H2BA), C4B(H4B), C6B(H6B), C7B(H7B), C9B(H9B), C10B(H10B), C1B'(H1B'),  
 C2B'(H2BB), C4C(H4C)

8.c Fitted hexagon refined as free rotating group:

C3(C5,C6,C12A,C7,C8), C7A(C8A,C9A,C9,C5A,C6A),  
 C15A(C16A,C17A,C2,C13A,C14A),  
 C7A'(C8A',C9A',C10A,C5A',C6A')

8.d Idealised Me refined as rotating group:

C2AA(H2AB,H2AC,H2AD), C4(H4D,H4E,H4F)

Crystal data and structure refinement for **2**.

Table 9 Fractional Atomic Coordinates ( $\times 10^4$ ) and Equivalent Isotropic Displacement Parameters ( $\text{\AA}^2 \times 10^3$ ) for **2**.  $U_{eq}$  is defined as 1/3 of the trace of the orthogonalised  $U_{ij}$  tensor.

| Atom | x          | y          | z          | U(eq)    |
|------|------------|------------|------------|----------|
| Fe01 | 7013.4(8)  | 7349.1(5)  | 7576.2(4)  | 44.7(3)  |
| Fe02 | 3771.8(9)  | 7740.2(5)  | 2561.2(4)  | 46.3(3)  |
| S1A  | 7790(2)    | 5268.3(10) | 4688.2(10) | 69.9(5)  |
| S1B  | 8501.5(17) | 9919.9(8)  | 5347.5(7)  | 50.0(4)  |
| S1C  | 482.6(16)  | 7657.6(11) | 5297.5(8)  | 55.0(4)  |
| N1A  | 8789(6)    | 7773(3)    | 8094(3)    | 52.4(13) |
| N2A  | 10682(7)   | 8085(4)    | 8784(3)    | 74.2(19) |
| N3A  | 8434(5)    | 7024(3)    | 7057(3)    | 47.2(12) |
| N4A  | 3458(6)    | 6604(3)    | 2931(3)    | 53.4(13) |
| N5A  | -142(8)    | 6688(4)    | 1429(4)    | 82(2)    |
| N6A  | 1819(6)    | 7190(3)    | 2017(3)    | 55.4(13) |
| N1B  | 5891(5)    | 7715(3)    | 8160(2)    | 48.6(12) |
| N2B  | 4917(6)    | 8071(3)    | 8908(2)    | 56.3(13) |
| N3B  | 6518(5)    | 8437(3)    | 7315(2)    | 44.1(11) |
| N4B  | 5976(5)    | 8186(3)    | 3019(2)    | 46.0(11) |
| N5B  | 6013(7)    | 7396(4)    | 1139(3)    | 63.7(15) |
| N6B  | 5038(6)    | 7400(3)    | 1926(3)    | 54.3(13) |
| N1C  | 7223(5)    | 6298(3)    | 7906(2)    | 48.8(12) |
| N2C  | 7374(6)    | 5264(3)    | 8412(3)    | 55.8(14) |
| N3C  | 5263(5)    | 6717(3)    | 7082(2)    | 42.2(11) |
| N4C  | 2427(5)    | 8375(3)    | 3110(2)    | 43(1)    |
| N5C  | 2462(6)    | 9640(3)    | 1521(2)    | 53.2(13) |
| N6C  | 3313(5)    | 8814(3)    | 2155(2)    | 47.6(11) |
| C1A  | 9230(7)    | 8109(4)    | 8621(3)    | 59.4(17) |
| C2A  | 11176(8)   | 7710(5)    | 8330(4)    | 69(2)    |
| C3A  | 10014(7)   | 7502(4)    | 7899(3)    | 55.8(16) |
| C4A  | 9751(7)    | 7116(4)    | 7335(3)    | 55.7(16) |
| C5A  | 8178(6)    | 6609(3)    | 6489(3)    | 50.8(15) |
| C6A  | 8790(7)    | 5869(3)    | 6400(3)    | 58.0(18) |
| C7A  | 8603(8)    | 5483(4)    | 5850(4)    | 61.0(19) |
| C8A  | 7844(7)    | 5810(3)    | 5368(3)    | 53.6(16) |
| C9A  | 7246(7)    | 6538(3)    | 5474(3)    | 55.5(16) |
| C10A | 7409(6)    | 6918(3)    | 6029(3)    | 49.2(15) |
| C11A | 6471(7)    | 5697(3)    | 4205(3)    | 56.3(16) |



|      |         |         |         |          |
|------|---------|---------|---------|----------|
| C12A | 5055(8) | 5772(4) | 4295(4) | 64.9(19) |
| C13A | 4050(7) | 6079(3) | 3882(3) | 55.3(17) |
| C14A | 4415(7) | 6294(3) | 3361(3) | 57.0(17) |
| C15A | 5835(7) | 6207(3) | 3278(3) | 55.0(16) |
| C16A | 6816(7) | 5930(3) | 3684(3) | 57.9(17) |
| C17A | 2204(8) | 6225(4) | 2717(4) | 66(2)    |
| C18A | 1320(7) | 6522(4) | 2222(4) | 60.9(17) |
| C19A | 64(8)   | 6214(4) | 1833(4) | 72(2)    |
| C20A | 921(8)  | 7292(5) | 1521(4) | 67.0(18) |
| C1B  | 5575(7) | 7496(4) | 8658(3) | 53.0(15) |
| C3B  | 4803(7) | 8715(4) | 8583(3) | 53.8(15) |
| C4B  | 5425(6) | 8487(4) | 8115(3) | 47.2(13) |
| C5B  | 5757(6) | 8847(3) | 7619(3) | 45.6(13) |
| C6B  | 6939(6) | 8782(3) | 6830(3) | 40.2(12) |
| C7B  | 5937(6) | 9011(3) | 6383(3) | 47.9(14) |
| C8B  | 6387(6) | 9344(3) | 5915(3) | 48.9(14) |
| C9B  | 7828(6) | 9439(3) | 5897(3) | 43.9(13) |
| C10B | 8840(6) | 9214(3) | 6347(3) | 47.3(14) |
| C11B | 8396(6) | 8887(3) | 6819(3) | 42.7(12) |
| C12B | 7616(6) | 9395(3) | 4690(3) | 45.9(13) |
| C13B | 7102(6) | 8575(3) | 4609(3) | 46.5(13) |
| C14B | 6541(6) | 8194(3) | 4075(3) | 47.8(14) |
| C15B | 6495(6) | 8597(3) | 3577(3) | 44.6(13) |
| C16B | 6968(6) | 9416(3) | 3644(3) | 46.8(13) |
| C17B | 7514(6) | 9804(3) | 4195(3) | 47.4(14) |
| C18B | 6819(6) | 8203(3) | 2637(3) | 46.6(13) |
| C19B | 6369(7) | 7829(3) | 2068(3) | 47.0(13) |
| C20B | 6972(7) | 7824(4) | 1576(3) | 57.0(16) |
| C21B | 4865(8) | 7155(4) | 1363(3) | 63.3(18) |
| C1C  | 7988(7) | 5995(4) | 8337(3) | 57.5(17) |
| C2C  | 6183(7) | 5094(3) | 7995(3) | 51.8(15) |
| C3C  | 6065(6) | 5735(3) | 7673(3) | 45.8(13) |
| C4C  | 5048(6) | 5984(3) | 7212(3) | 45.3(13) |
| C5C  | 4177(5) | 6966(3) | 6637(3) | 38.7(12) |
| C6C  | 3968(7) | 6599(3) | 6075(3) | 44.9(13) |
| C7C  | 2873(7) | 6808(3) | 5648(3) | 49.0(14) |
| C8C  | 1994(6) | 7409(3) | 5797(3) | 43.0(12) |
| C9C  | 2230(6) | 7781(3) | 6367(3) | 46.3(13) |
| C10C | 3296(6) | 7559(3) | 6786(3) | 44.6(13) |
| C11C | 1177(6) | 7785(3) | 4657(3) | 45.9(13) |
| C12C | 2566(6) | 8087(3) | 4663(3) | 48.3(13) |

|      |           |          |            |          |
|------|-----------|----------|------------|----------|
| C13C | 2968(6)   | 8256(3)  | 4143(3)    | 44.9(13) |
| C14C | 2001(6)   | 8154(3)  | 3632(3)    | 40.4(12) |
| C15C | 612(7)    | 7845(4)  | 3625(3)    | 58.7(16) |
| C16C | 223(7)    | 7649(4)  | 4145(3)    | 60.1(17) |
| C17C | 1766(6)   | 8937(3)  | 2855(3)    | 43.9(12) |
| C18C | 2191(6)   | 9173(3)  | 2337(3)    | 44.6(13) |
| C19C | 1624(7)   | 9682(4)  | 1937(3)    | 51.5(14) |
| C20C | 3468(7)   | 9117(4)  | 1668(3)    | 52.8(14) |
| F1   | 4241(17)  | 9051(12) | 489(7)     | 94(4)    |
| F2   | 2912(13)  | 8817(7)  | -348(4)    | 76(3)    |
| F4   | 2182(12)  | 8330(7)  | 463(6)     | 77(3)    |
| F0AA | 4362(19)  | 7951(11) | 33(6)      | 136(5)   |
| B9   | 3229(10)  | 8411(6)  | 155(4)     | 95(2)    |
| F006 | 1142(4)   | 10367(2) | 7510.1(19) | 61.8(11) |
| F007 | 1551(5)   | 9524(2)  | 8204.0(19) | 73.4(13) |
| F008 | 3417(4)   | 10153(2) | 7910(2)    | 75.5(13) |
| F009 | 2086(5)   | 9167(3)  | 7329(2)    | 81.3(12) |
| B02Q | 2067(8)   | 9802(4)  | 7745(3)    | 47.5(15) |
| F8   | 2568(14)  | 8021(8)  | 562(6)     | 97(4)    |
| F10  | 2198(18)  | 8798(9)  | -189(7)    | 144(6)   |
| F11  | 4456(18)  | 8836(12) | 445(9)     | 112(6)   |
| F15  | 3448(13)  | 7702(6)  | -174(6)    | 99(4)    |
| B9A  | 3229(10)  | 8411(6)  | 155(4)     | 95(2)    |
| F1AA | 2700(20)  | 4855(12) | 7852(13)   | 168(11)  |
| F2AA | 2638(8)   | 6268(4)  | 7782(4)    | 166(3)   |
| F5AA | 1920(15)  | 5540(10) | 7136(7)    | 158(5)   |
| F7AA | 523(9)    | 5381(6)  | 7654(7)    | 121(5)   |
| F1AB | 2810(20)  | 4878(11) | 7688(10)   | 106(5)   |
| F0BA | 1410(16)  | 5629(6)  | 8300(7)    | 143(6)   |
| B2   | 1955(13)  | 5518(7)  | 7772(7)    | 153(8)   |
| B2A  | 2003(16)  | 5468(10) | 7735(10)   | 125(6)   |
| F3AA | 8189(9)   | 6220(4)  | 10292(4)   | 173(4)   |
| F4AA | 8542(11)  | 7487(5)  | 10456(4)   | 154(3)   |
| F6AA | 8383(9)   | 6993(7)  | 9540(3)    | 182(4)   |
| F8AA | 6488(9)   | 7057(7)  | 9958(3)    | 170(4)   |
| B0AA | 7933(13)  | 6919(9)  | 10026(5)   | 91(3)    |
| N01B | 1984(7)   | 5753(3)  | 665(3)     | 68.5(16) |
| C030 | 1397(17)  | 6093(11) | -413(6)    | 168(7)   |
| C02V | 1728(11)  | 5907(6)  | 194(4)     | 85(2)    |
| N02E | 11926(9)  | 10512(5) | 10502(3)   | 88(2)    |
| C02M | 11870(10) | 10571(5) | 10031(4)   | 73(2)    |

C02X      11916(17)      10643(6)      9425(4)      123(4)

Table 10 Anisotropic Displacement Parameters ( $\text{\AA}^2 \times 10^3$ ) for **2**. The Anisotropic displacement factor exponent takes the form:  $-2\pi^2[h^2a^{*2}U_{11}+2hka^*b^*U_{12}+\dots]$ .

| Atom | U <sub>11</sub> | U <sub>22</sub> | U <sub>33</sub> | U <sub>23</sub> | U <sub>13</sub> | U <sub>12</sub> |
|------|-----------------|-----------------|-----------------|-----------------|-----------------|-----------------|
| Fe01 | 40.3(5)         | 47.2(4)         | 51.4(6)         | 14.0(4)         | 17.2(4)         | 2.2(3)          |
| Fe02 | 40.9(5)         | 53.3(5)         | 48.3(5)         | 2.7(4)          | 19.2(4)         | 2.2(4)          |
| S1A  | 77.6(13)        | 57.9(9)         | 77.4(14)        | -3.4(9)         | 22.9(10)        | 21.8(8)         |
| S1B  | 54.7(9)         | 49.5(7)         | 49.5(9)         | 9.6(6)          | 20.7(7)         | -8.6(6)         |
| S1C  | 36.5(8)         | 85(1)           | 50.4(10)        | 19.9(8)         | 19.5(7)         | 6.1(7)          |
| N1A  | 54(3)           | 52(3)           | 52(3)           | 11(2)           | 12(3)           | 0(2)            |
| N2A  | 71(4)           | 78(4)           | 66(4)           | 26(3)           | -13(3)          | -13(3)          |
| N3A  | 36(3)           | 43(2)           | 66(4)           | 13(2)           | 17(2)           | 1.3(19)         |
| N4A  | 48(3)           | 50(3)           | 65(4)           | -3(2)           | 23(3)           | 0(2)            |
| N5A  | 72(4)           | 80(4)           | 83(6)           | -7(4)           | -4(4)           | 4(3)            |
| N6A  | 44(3)           | 63(3)           | 58(4)           | -1(3)           | 10(2)           | 7(2)            |
| N1B  | 45(3)           | 57(3)           | 47(3)           | 17(2)           | 13(2)           | -3(2)           |
| N2B  | 58(3)           | 75(3)           | 42(3)           | 16(3)           | 20(3)           | 6(3)            |
| N3B  | 38(2)           | 52(2)           | 45(3)           | 12(2)           | 15(2)           | -1(2)           |
| N4B  | 45(3)           | 47(2)           | 50(3)           | 3(2)            | 21(2)           | 2(2)            |
| N5B  | 69(4)           | 79(3)           | 47(3)           | 0(3)            | 25(3)           | 12(3)           |
| N6B  | 53(3)           | 63(3)           | 51(3)           | 0(2)            | 24(3)           | 3(2)            |
| N1C  | 44(3)           | 50(2)           | 55(3)           | 12(2)           | 11(2)           | 2(2)            |
| N2C  | 61(3)           | 53(3)           | 58(4)           | 20(3)           | 14(3)           | 17(2)           |
| N3C  | 36(2)           | 47(2)           | 50(3)           | 13(2)           | 19(2)           | 5.4(19)         |
| N4C  | 35(2)           | 54(2)           | 43(3)           | 7(2)            | 13(2)           | 4.6(19)         |
| N5C  | 56(3)           | 69(3)           | 39(3)           | 12(2)           | 17(2)           | 5(2)            |
| N6C  | 41(3)           | 64(3)           | 41(3)           | 8(2)            | 13(2)           | 6(2)            |
| C1A  | 58(4)           | 60(4)           | 61(5)           | 19(3)           | 10(3)           | -2(3)           |
| C2A  | 52(4)           | 80(4)           | 76(6)           | 22(4)           | 8(4)            | 2(3)            |
| C3A  | 47(3)           | 57(3)           | 65(5)           | 18(3)           | 12(3)           | -6(3)           |
| C4A  | 56(4)           | 54(3)           | 65(5)           | 20(3)           | 25(3)           | 6(3)            |
| C5A  | 47(3)           | 47(3)           | 67(4)           | 8(3)            | 32(3)           | -2(2)           |
| C6A  | 61(4)           | 48(3)           | 75(5)           | 18(3)           | 33(4)           | 9(3)            |
| C7A  | 64(4)           | 47(3)           | 81(5)           | 5(3)            | 37(4)           | 9(3)            |
| C8A  | 56(4)           | 44(3)           | 68(5)           | 10(3)           | 29(3)           | 5(3)            |
| C9A  | 65(4)           | 41(3)           | 67(5)           | 7(3)            | 29(3)           | 2(3)            |
| C10A | 48(3)           | 41(3)           | 65(4)           | 9(3)            | 24(3)           | 4(2)            |
| C11A | 60(4)           | 40(3)           | 73(5)           | -3(3)           | 26(3)           | 3(3)            |
| C12A | 79(5)           | 50(3)           | 73(5)           | 2(3)            | 37(4)           | -5(3)           |

|      |       |       |       |        |       |        |
|------|-------|-------|-------|--------|-------|--------|
| C13A | 46(3) | 47(3) | 80(5) | 8(3)   | 29(3) | 2(3)   |
| C14A | 58(4) | 42(3) | 75(5) | -2(3)  | 30(4) | -5(3)  |
| C15A | 48(4) | 51(3) | 67(5) | 0(3)   | 22(3) | -7(3)  |
| C16A | 54(4) | 46(3) | 75(5) | -11(3) | 25(3) | -5(3)  |
| C17A | 64(4) | 44(3) | 95(6) | -6(3)  | 37(4) | -8(3)  |
| C18A | 44(4) | 63(4) | 74(5) | -6(3)  | 10(3) | 6(3)   |
| C19A | 61(4) | 61(4) | 86(6) | -11(4) | 8(4)  | -15(3) |
| C20A | 48(4) | 84(4) | 65(5) | -11(4) | 8(3)  | 2(3)   |
| C1B  | 53(4) | 66(3) | 46(4) | 17(3)  | 18(3) | 9(3)   |
| C3B  | 47(3) | 66(3) | 51(4) | 10(3)  | 14(3) | 11(3)  |
| C4B  | 40(3) | 62(3) | 46(3) | 16(3)  | 17(3) | 5(2)   |
| C5B  | 39(3) | 54(3) | 48(4) | 10(3)  | 15(3) | 2(2)   |
| C6B  | 42(3) | 42(2) | 40(3) | 8(2)   | 17(2) | 1(2)   |
| C7B  | 37(3) | 56(3) | 57(4) | 18(3)  | 18(3) | 2(2)   |
| C8B  | 44(3) | 53(3) | 54(4) | 15(3)  | 15(3) | 3(2)   |
| C9B  | 45(3) | 44(3) | 48(3) | 6(2)   | 23(3) | 2(2)   |
| C10B | 49(3) | 45(3) | 51(4) | 7(2)   | 19(3) | -7(2)  |
| C11B | 40(3) | 46(3) | 45(3) | 11(2)  | 12(2) | -2(2)  |
| C12B | 45(3) | 51(3) | 49(4) | 13(3)  | 22(3) | 5(2)   |
| C13B | 52(3) | 48(3) | 44(3) | 9(2)   | 20(3) | -1(2)  |
| C14B | 53(3) | 44(3) | 50(4) | 7(2)   | 21(3) | -5(2)  |
| C15B | 37(3) | 49(3) | 52(4) | 4(2)   | 21(3) | 5(2)   |
| C16B | 46(3) | 52(3) | 45(3) | 11(3)  | 16(3) | -1(2)  |
| C17B | 50(3) | 46(3) | 50(4) | 12(2)  | 18(3) | -5(2)  |
| C18B | 48(3) | 48(3) | 49(4) | 7(3)   | 19(3) | 5(2)   |
| C19B | 52(3) | 47(3) | 46(4) | 6(2)   | 20(3) | 6(2)   |
| C20B | 51(4) | 75(4) | 52(4) | 10(3)  | 24(3) | 12(3)  |
| C21B | 69(5) | 71(4) | 54(4) | -5(3)  | 28(4) | 3(3)   |
| C1C  | 51(4) | 58(3) | 66(5) | 18(3)  | 11(3) | 2(3)   |
| C2C  | 54(4) | 49(3) | 56(4) | 15(3)  | 14(3) | 2(3)   |
| C3C  | 50(3) | 43(3) | 50(4) | 6(2)   | 24(3) | 1(2)   |
| C4C  | 45(3) | 46(3) | 50(4) | 10(2)  | 20(3) | 0(2)   |
| C5C  | 34(3) | 42(2) | 42(3) | 5(2)   | 14(2) | -6(2)  |
| C6C  | 55(3) | 45(3) | 39(3) | 6(2)   | 19(3) | 3(2)   |
| C7C  | 54(3) | 52(3) | 44(3) | 7(3)   | 17(3) | 0(3)   |
| C8C  | 39(3) | 50(3) | 45(3) | 10(2)  | 19(2) | -1(2)  |
| C9C  | 47(3) | 50(3) | 46(3) | 8(2)   | 21(3) | 2(2)   |
| C10C | 43(3) | 50(3) | 46(3) | 10(2)  | 19(3) | 5(2)   |
| C11C | 40(3) | 59(3) | 42(3) | 11(3)  | 14(2) | 4(2)   |
| C12C | 46(3) | 58(3) | 42(3) | 6(3)   | 13(3) | -5(2)  |
| C13C | 33(3) | 60(3) | 43(3) | 4(3)   | 14(2) | -4(2)  |

|      |         |         |         |        |          |          |
|------|---------|---------|---------|--------|----------|----------|
| C14C | 32(3)   | 50(3)   | 41(3)   | 5(2)   | 12(2)    | 7(2)     |
| C15C | 42(3)   | 89(4)   | 46(4)   | 10(3)  | 11(3)    | -7(3)    |
| C16C | 38(3)   | 88(4)   | 56(4)   | 14(3)  | 12(3)    | -10(3)   |
| C17C | 39(3)   | 53(3)   | 43(3)   | 5(2)   | 15(2)    | 4(2)     |
| C18C | 35(3)   | 58(3)   | 44(3)   | 9(3)   | 15(2)    | 4(2)     |
| C19C | 54(4)   | 63(3)   | 42(3)   | 13(3)  | 18(3)    | 9(3)     |
| C20C | 42(3)   | 77(4)   | 45(4)   | 10(3)  | 17(3)    | 9(3)     |
| F1   | 79(6)   | 169(9)  | 51(5)   | 33(5)  | 47(4)    | 10(6)    |
| F2   | 93(7)   | 92(6)   | 45(4)   | -1(4)  | 14(4)    | 28(5)    |
| F4   | 80(6)   | 77(6)   | 73(7)   | -7(5)  | 14(5)    | 16(5)    |
| F0AA | 170(10) | 192(10) | 67(8)   | 43(7)  | 38(8)    | 99(9)    |
| B9   | 100(5)  | 123(6)  | 67(5)   | 14(4)  | 20(4)    | 37(4)    |
| F006 | 46(2)   | 74(2)   | 75(3)   | 36(2)  | 19.1(19) | 8.3(17)  |
| F007 | 92(3)   | 87(3)   | 61(3)   | 37(2)  | 45(2)    | 31(2)    |
| F008 | 46(2)   | 65(2)   | 108(4)  | 18(2)  | -8(2)    | -3.0(17) |
| F009 | 92(3)   | 90(3)   | 59(3)   | -17(2) | 14(2)    | 17(2)    |
| B02Q | 49(4)   | 53(3)   | 45(4)   | 6(3)   | 20(3)    | 4(3)     |
| F8   | 89(8)   | 131(10) | 72(7)   | -8(6)  | 20(6)    | 25(6)    |
| F10  | 177(12) | 103(7)  | 115(10) | -30(7) | -61(8)   | 39(8)    |
| F11  | 101(8)  | 156(11) | 87(10)  | 29(7)  | 28(7)    | 15(7)    |
| F15  | 97(7)   | 100(5)  | 115(9)  | 2(5)   | 68(7)    | -5(5)    |
| B9A  | 100(5)  | 123(6)  | 67(5)   | 14(4)  | 20(4)    | 37(4)    |
| F1AA | 138(15) | 132(9)  | 270(30) | -3(10) | 139(17)  | 0(8)     |
| F2AA | 145(6)  | 140(4)  | 252(10) | 39(5)  | 128(6)   | 17(4)    |
| F5AA | 91(8)   | 189(11) | 217(11) | 52(7)  | 66(7)    | 32(7)    |
| F7AA | 67(5)   | 108(7)  | 217(13) | 109(8) | 53(6)    | 23(4)    |
| F1AB | 72(7)   | 134(8)  | 131(12) | 34(7)  | 59(8)    | 10(6)    |
| F0BA | 180(12) | 92(6)   | 192(13) | -20(7) | 156(12)  | -39(7)   |
| B2   | 172(17) | 131(9)  | 204(16) | 24(9)  | 162(13)  | 15(8)    |
| B2A  | 77(8)   | 117(8)  | 209(14) | 63(7)  | 69(8)    | 24(6)    |
| F3AA | 162(7)  | 130(5)  | 192(9)  | 30(6)  | -59(7)   | -28(5)   |
| F4AA | 215(9)  | 160(6)  | 93(6)   | -6(5)  | 44(6)    | 52(6)    |
| F6AA | 159(7)  | 348(13) | 68(5)   | 58(7)  | 52(5)    | 123(8)   |
| F8AA | 127(6)  | 327(11) | 74(5)   | 62(6)  | 33(4)    | 72(7)    |
| B0AA | 88(8)   | 140(10) | 61(7)   | 37(7)  | 29(6)    | 47(7)    |
| N01B | 76(4)   | 67(3)   | 63(4)   | 14(3)  | 4(3)     | 22(3)    |
| C030 | 153(12) | 290(20) | 74(7)   | 60(10) | 15(8)    | 93(13)   |
| C02V | 92(6)   | 101(6)  | 61(5)   | 16(5)  | 4(4)     | 27(5)    |
| N02E | 116(6)  | 101(5)  | 54(4)   | 25(3)  | 20(4)    | 39(4)    |
| C02M | 100(6)  | 71(4)   | 50(4)   | 16(3)  | 12(4)    | 9(4)     |
| C02X | 213(14) | 104(7)  | 56(5)   | 28(5)  | 32(6)    | -10(8)   |

Table 11 Bond Lengths for 2.

| Atom | Atom | Length/Å  | Atom | Atom | Length/Å  |
|------|------|-----------|------|------|-----------|
| Fe01 | N1A  | 1.959(6)  | C13A | C14A | 1.409(9)  |
| Fe01 | N3A  | 2.044(5)  | C14A | C15A | 1.413(9)  |
| Fe01 | N1B  | 1.963(5)  | C15A | C16A | 1.346(10) |
| Fe01 | N3B  | 2.025(4)  | C17A | C18A | 1.455(11) |
| Fe01 | N1C  | 1.993(4)  | C18A | C19A | 1.414(10) |
| Fe01 | N3C  | 2.038(5)  | C3B  | C4B  | 1.377(9)  |
| Fe02 | N4A  | 2.192(5)  | C4B  | C5B  | 1.440(8)  |
| Fe02 | N6A  | 2.170(6)  | C6B  | C7B  | 1.386(8)  |
| Fe02 | N4B  | 2.239(5)  | C6B  | C11B | 1.394(8)  |
| Fe02 | N6B  | 2.141(5)  | C7B  | C8B  | 1.405(8)  |
| Fe02 | N4C  | 2.219(5)  | C8B  | C9B  | 1.382(8)  |
| Fe02 | N6C  | 2.140(5)  | C9B  | C10B | 1.393(9)  |
| S1A  | C8A  | 1.760(8)  | C10B | C11B | 1.408(7)  |
| S1A  | C11A | 1.767(8)  | C12B | C13B | 1.417(8)  |
| S1B  | C9B  | 1.784(5)  | C12B | C17B | 1.400(8)  |
| S1B  | C12B | 1.760(7)  | C13B | C14B | 1.364(9)  |
| S1C  | C8C  | 1.784(6)  | C14B | C15B | 1.403(8)  |
| S1C  | C11C | 1.782(6)  | C15B | C16B | 1.405(8)  |
| N1A  | C1A  | 1.304(9)  | C16B | C17B | 1.397(9)  |
| N1A  | C3A  | 1.409(9)  | C18B | C19B | 1.412(9)  |
| N2A  | C1A  | 1.371(9)  | C19B | C20B | 1.386(8)  |
| N2A  | C2A  | 1.358(11) | C2C  | C3C  | 1.369(8)  |
| N3A  | C4A  | 1.302(9)  | C3C  | C4C  | 1.430(9)  |
| N3A  | C5A  | 1.425(9)  | C5C  | C6C  | 1.387(8)  |
| N4A  | C14A | 1.394(9)  | C5C  | C10C | 1.391(8)  |
| N4A  | C17A | 1.316(9)  | C6C  | C7C  | 1.397(9)  |
| N5A  | C19A | 1.289(11) | C7C  | C8C  | 1.399(8)  |
| N5A  | C20A | 1.368(10) | C8C  | C9C  | 1.404(8)  |
| N6A  | C18A | 1.355(8)  | C9C  | C10C | 1.376(8)  |
| N6A  | C20A | 1.353(9)  | C11C | C12C | 1.389(8)  |
| N1B  | C1B  | 1.342(8)  | C11C | C16C | 1.370(9)  |
| N1B  | C4B  | 1.394(8)  | C12C | C13C | 1.398(8)  |
| N2B  | C1B  | 1.326(8)  | C13C | C14C | 1.371(8)  |
| N2B  | C3B  | 1.377(8)  | C14C | C15C | 1.391(8)  |
| N3B  | C5B  | 1.287(7)  | C15C | C16C | 1.406(9)  |
| N3B  | C6B  | 1.440(6)  | C17C | C18C | 1.437(8)  |
| N4B  | C15B | 1.420(8)  | C18C | C19C | 1.386(8)  |

|      |      |           |      |      |           |
|------|------|-----------|------|------|-----------|
| N4B  | C18B | 1.312(7)  | F1   | B9   | 1.470(13) |
| N5B  | C20B | 1.368(9)  | F2   | B9   | 1.416(10) |
| N5B  | C21B | 1.357(9)  | F4   | B9   | 1.344(11) |
| N6B  | C19B | 1.394(8)  | F0AA | B9   | 1.412(11) |
| N6B  | C21B | 1.333(9)  | F006 | B02Q | 1.408(8)  |
| N1C  | C1C  | 1.300(8)  | F007 | B02Q | 1.375(7)  |
| N1C  | C3C  | 1.410(8)  | F008 | B02Q | 1.360(8)  |
| N2C  | C1C  | 1.368(8)  | F009 | B02Q | 1.383(8)  |
| N2C  | C2C  | 1.362(9)  | F8   | B9A  | 1.426(11) |
| N3C  | C4C  | 1.307(6)  | F10  | B9A  | 1.385(11) |
| N3C  | C5C  | 1.443(7)  | F11  | B9A  | 1.369(13) |
| N4C  | C14C | 1.439(7)  | F15  | B9A  | 1.403(11) |
| N4C  | C17C | 1.294(7)  | F1AA | B2   | 1.359(11) |
| N5C  | C19C | 1.372(8)  | F2AA | B2   | 1.378(10) |
| N5C  | C20C | 1.351(8)  | F2AA | B2A  | 1.426(16) |
| N6C  | C18C | 1.366(7)  | F5AA | B2A  | 1.420(19) |
| N6C  | C20C | 1.329(8)  | F7AA | B2A  | 1.386(15) |
| C2A  | C3A  | 1.370(10) | F1AB | B2A  | 1.291(16) |
| C3A  | C4A  | 1.399(10) | F0BA | B2   | 1.435(12) |
| C5A  | C6A  | 1.409(8)  | F3AA | B0AA | 1.389(13) |
| C5A  | C10A | 1.358(9)  | F4AA | B0AA | 1.351(16) |
| C6A  | C7A  | 1.375(10) | F6AA | B0AA | 1.310(12) |
| C7A  | C8A  | 1.407(10) | F8AA | B0AA | 1.390(13) |
| C8A  | C9A  | 1.391(8)  | N01B | C02V | 1.151(10) |
| C9A  | C10A | 1.381(9)  | C030 | C02V | 1.476(14) |
| C11A | C12A | 1.412(10) | N02E | C02M | 1.118(10) |
| C11A | C16A | 1.413(10) | C02M | C02X | 1.455(11) |
| C12A | C13A | 1.393(10) |      |      |           |

Table 12 Bond Angles for **2**.

| Atom | Atom | Atom | Angle/°    | Atom | Atom | Atom | Angle/°  |
|------|------|------|------------|------|------|------|----------|
| N1A  | Fe01 | N3A  | 81.2(2)    | N6A  | C18A | C19A | 107.3(7) |
| N1A  | Fe01 | N1B  | 90.6(2)    | C19A | C18A | C17A | 134.1(6) |
| N1A  | Fe01 | N3B  | 94.0(2)    | N5A  | C19A | C18A | 107.0(6) |
| N1A  | Fe01 | N1C  | 89.2(2)    | N6A  | C20A | N5A  | 107.6(7) |
| N1A  | Fe01 | N3C  | 169.97(19) | N2B  | C1B  | N1B  | 110.2(5) |
| N1B  | Fe01 | N3A  | 171.8(2)   | N2B  | C3B  | C4B  | 104.8(6) |
| N1B  | Fe01 | N3B  | 80.12(19)  | N1B  | C4B  | C5B  | 113.9(5) |
| N1B  | Fe01 | N1C  | 90.6(2)    | C3B  | C4B  | N1B  | 109.2(5) |

|      |      |      |            |      |      |      |          |
|------|------|------|------------|------|------|------|----------|
| N1B  | Fe01 | N3C  | 91.4(2)    | C3B  | C4B  | C5B  | 136.8(6) |
| N3B  | Fe01 | N3A  | 100.98(18) | N3B  | C5B  | C4B  | 115.7(5) |
| N3B  | Fe01 | N3C  | 96.01(19)  | C7B  | C6B  | N3B  | 121.6(5) |
| N1C  | Fe01 | N3A  | 88.7(2)    | C7B  | C6B  | C11B | 120.3(5) |
| N1C  | Fe01 | N3B  | 170.2(2)   | C11B | C6B  | N3B  | 118.1(5) |
| N1C  | Fe01 | N3C  | 81.0(2)    | C6B  | C7B  | C8B  | 120.0(5) |
| N3C  | Fe01 | N3A  | 96.6(2)    | C9B  | C8B  | C7B  | 120.1(6) |
| N4A  | Fe02 | N4B  | 102.0(2)   | C8B  | C9B  | S1B  | 123.1(5) |
| N4A  | Fe02 | N4C  | 92.33(18)  | C8B  | C9B  | C10B | 120.1(5) |
| N6A  | Fe02 | N4A  | 77.2(2)    | C10B | C9B  | S1B  | 116.6(4) |
| N6A  | Fe02 | N4B  | 170.3(2)   | C9B  | C10B | C11B | 120.1(5) |
| N6A  | Fe02 | N4C  | 88.2(2)    | C6B  | C11B | C10B | 119.4(5) |
| N6B  | Fe02 | N4A  | 101.89(19) | C13B | C12B | S1B  | 125.7(5) |
| N6B  | Fe02 | N6A  | 92.5(2)    | C17B | C12B | S1B  | 117.1(4) |
| N6B  | Fe02 | N4B  | 78.1(2)    | C17B | C12B | C13B | 116.9(6) |
| N6B  | Fe02 | N4C  | 165.57(18) | C14B | C13B | C12B | 122.0(5) |
| N4C  | Fe02 | N4B  | 101.53(18) | C13B | C14B | C15B | 120.9(5) |
| N6C  | Fe02 | N4A  | 160.7(2)   | C14B | C15B | N4B  | 120.7(5) |
| N6C  | Fe02 | N6A  | 86.9(2)    | C14B | C15B | C16B | 118.4(6) |
| N6C  | Fe02 | N4B  | 95.54(18)  | C16B | C15B | N4B  | 120.9(5) |
| N6C  | Fe02 | N6B  | 89.3(2)    | C17B | C16B | C15B | 120.1(5) |
| N6C  | Fe02 | N4C  | 76.30(18)  | C16B | C17B | C12B | 121.6(5) |
| C8A  | S1A  | C11A | 105.5(3)   | N4B  | C18B | C19B | 121.0(5) |
| C12B | S1B  | C9B  | 105.3(3)   | N6B  | C19B | C18B | 118.8(5) |
| C11C | S1C  | C8C  | 103.7(3)   | C20B | C19B | N6B  | 108.6(6) |
| C1A  | N1A  | Fe01 | 139.9(5)   | C20B | C19B | C18B | 132.5(6) |
| C1A  | N1A  | C3A  | 106.2(6)   | N5B  | C20B | C19B | 106.6(6) |
| C3A  | N1A  | Fe01 | 112.3(5)   | N6B  | C21B | N5B  | 111.4(7) |
| C2A  | N2A  | C1A  | 107.5(7)   | N1C  | C1C  | N2C  | 110.1(6) |
| C4A  | N3A  | Fe01 | 112.0(5)   | N2C  | C2C  | C3C  | 106.7(5) |
| C4A  | N3A  | C5A  | 117.5(5)   | N1C  | C3C  | C4C  | 115.5(4) |
| C5A  | N3A  | Fe01 | 129.7(4)   | C2C  | C3C  | N1C  | 107.6(6) |
| C14A | N4A  | Fe02 | 126.4(4)   | C2C  | C3C  | C4C  | 136.7(6) |
| C17A | N4A  | Fe02 | 112.7(5)   | N3C  | C4C  | C3C  | 116.2(5) |
| C17A | N4A  | C14A | 120.9(5)   | C6C  | C5C  | N3C  | 120.8(5) |
| C19A | N5A  | C20A | 110.6(7)   | C6C  | C5C  | C10C | 120.2(6) |
| C18A | N6A  | Fe02 | 112.4(5)   | C10C | C5C  | N3C  | 118.9(5) |
| C20A | N6A  | Fe02 | 140.0(5)   | C5C  | C6C  | C7C  | 121.2(5) |
| C20A | N6A  | C18A | 107.5(6)   | C6C  | C7C  | C8C  | 118.6(6) |
| C1B  | N1B  | Fe01 | 139.0(4)   | C7C  | C8C  | S1C  | 121.6(5) |
| C1B  | N1B  | C4B  | 105.8(5)   | C7C  | C8C  | C9C  | 119.5(6) |



|      |     |      |          |      |      |      |           |
|------|-----|------|----------|------|------|------|-----------|
| C4B  | N1B | Fe01 | 114.4(3) | C9C  | C8C  | S1C  | 118.7(4)  |
| C1B  | N2B | C3B  | 110.0(5) | C10C | C9C  | C8C  | 121.4(6)  |
| C5B  | N3B | Fe01 | 115.7(4) | C9C  | C10C | C5C  | 119.1(6)  |
| C5B  | N3B | C6B  | 118.2(5) | C12C | C11C | S1C  | 123.2(5)  |
| C6B  | N3B | Fe01 | 126.1(4) | C16C | C11C | S1C  | 116.5(4)  |
| C15B | N4B | Fe02 | 132.1(3) | C16C | C11C | C12C | 119.9(5)  |
| C18B | N4B | Fe02 | 108.6(4) | C11C | C12C | C13C | 119.3(6)  |
| C18B | N4B | C15B | 117.4(5) | C14C | C13C | C12C | 121.1(5)  |
| C21B | N5B | C20B | 107.6(6) | C13C | C14C | N4C  | 119.7(5)  |
| C19B | N6B | Fe02 | 109.4(4) | C13C | C14C | C15C | 119.7(5)  |
| C21B | N6B | Fe02 | 139.3(5) | C15C | C14C | N4C  | 120.6(5)  |
| C21B | N6B | C19B | 105.8(5) | C14C | C15C | C16C | 119.2(6)  |
| C1C  | N1C | Fe01 | 139.2(5) | C11C | C16C | C15C | 120.8(5)  |
| C1C  | N1C | C3C  | 107.3(5) | N4C  | C17C | C18C | 118.3(5)  |
| C3C  | N1C | Fe01 | 112.4(4) | N6C  | C18C | C17C | 118.0(5)  |
| C2C  | N2C | C1C  | 108.2(5) | N6C  | C18C | C19C | 109.3(5)  |
| C4C  | N3C | Fe01 | 114.6(4) | C19C | C18C | C17C | 132.5(6)  |
| C4C  | N3C | C5C  | 114.9(5) | N5C  | C19C | C18C | 105.6(6)  |
| C5C  | N3C | Fe01 | 130.3(3) | N6C  | C20C | N5C  | 110.9(5)  |
| C14C | N4C | Fe02 | 129.3(3) | F2   | B9   | F1   | 95.6(11)  |
| C17C | N4C | Fe02 | 111.9(4) | F4   | B9   | F1   | 105.2(10) |
| C17C | N4C | C14C | 117.5(5) | F4   | B9   | F2   | 116.7(9)  |
| C20C | N5C | C19C | 107.7(5) | F4   | B9   | F0AA | 135.6(11) |
| C18C | N6C | Fe02 | 111.6(3) | F0AA | B9   | F1   | 91.4(13)  |
| C20C | N6C | Fe02 | 138.1(4) | F0AA | B9   | F2   | 101.8(9)  |
| C20C | N6C | C18C | 106.4(5) | F007 | B02Q | F006 | 108.2(5)  |
| N1A  | C1A | N2A  | 111.1(7) | F007 | B02Q | F009 | 109.4(5)  |
| N2A  | C2A | C3A  | 107.0(7) | F008 | B02Q | F006 | 109.7(5)  |
| C2A  | C3A | N1A  | 108.2(7) | F008 | B02Q | F007 | 111.8(6)  |
| C2A  | C3A | C4A  | 137.2(7) | F008 | B02Q | F009 | 108.5(6)  |
| C4A  | C3A | N1A  | 114.7(6) | F009 | B02Q | F006 | 109.3(6)  |
| N3A  | C4A | C3A  | 118.1(6) | F10  | B9A  | F8   | 108.4(11) |
| C6A  | C5A | N3A  | 118.9(6) | F10  | B9A  | F15  | 106.6(10) |
| C10A | C5A | N3A  | 122.1(5) | F11  | B9A  | F8   | 108.6(12) |
| C10A | C5A | C6A  | 119.0(7) | F11  | B9A  | F10  | 119.9(13) |
| C7A  | C6A | C5A  | 119.2(7) | F11  | B9A  | F15  | 114.8(12) |
| C6A  | C7A | C8A  | 122.1(6) | F15  | B9A  | F8   | 95.7(9)   |
| C7A  | C8A | S1A  | 116.5(5) | F1AA | B2   | F2AA | 121.5(14) |
| C9A  | C8A | S1A  | 126.6(6) | F1AA | B2   | F0BA | 101.6(14) |
| C9A  | C8A | C7A  | 116.9(7) | F2AA | B2   | F0BA | 99.7(9)   |
| C10A | C9A | C8A  | 120.9(7) | F5AA | B2A  | F2AA | 81.9(12)  |

|                |          |                |           |
|----------------|----------|----------------|-----------|
| C5A C10A C9A   | 121.8(6) | F7AA B2A F2AA  | 116.8(12) |
| C12A C11A S1A  | 123.4(6) | F7AA B2A F5AA  | 90.0(14)  |
| C12A C11A C16A | 117.8(7) | F1AB B2A F2AA  | 118.2(15) |
| C16A C11A S1A  | 118.7(5) | F1AB B2A F5AA  | 88.9(16)  |
| C13A C12A C11A | 120.3(6) | F1AB B2A F7AA  | 124.2(17) |
| C12A C13A C14A | 120.7(6) | F3AA B0AA F8AA | 110.1(10) |
| N4A C14A C13A  | 123.4(6) | F4AA B0AA F3AA | 101.2(9)  |
| N4A C14A C15A  | 118.6(6) | F4AA B0AA F8AA | 103.1(10) |
| C13A C14A C15A | 118.0(7) | F6AA B0AA F3AA | 118.5(11) |
| C16A C15A C14A | 121.3(7) | F6AA B0AA F4AA | 113.1(12) |
| C15A C16A C11A | 121.8(6) | F6AA B0AA F8AA | 109.7(9)  |
| N4A C17A C18A  | 118.5(6) | N01B C02V C030 | 179.3(13) |
| N6A C18A C17A  | 118.0(6) | N02E C02M C02X | 175.6(12) |

Table 13 Hydrogen Bonds for **2**.

| D   | H   | A                 | d(D-H)/Å | d(H-A)/Å | d(D-A)/Å  | D-H-A/° |
|-----|-----|-------------------|----------|----------|-----------|---------|
| N2A | H2A | F2 <sup>1</sup>   | 0.86     | 2.01     | 2.816(15) | 156.0   |
| N2A | H2A | F10 <sup>1</sup>  | 0.86     | 1.87     | 2.726(16) | 173.2   |
| N5A | H5A | F3AA <sup>2</sup> | 0.86     | 2.09     | 2.883(12) | 152.8   |
| N5A | H5A | F4AA <sup>2</sup> | 0.86     | 2.28     | 2.889(11) | 128.1   |
| N2B | H2B | F0AA <sup>3</sup> | 0.86     | 1.98     | 2.824(14) | 166.7   |
| N2B | H2B | F15 <sup>3</sup>  | 0.86     | 2.05     | 2.878(11) | 161.8   |
| N2C | H2C | N01B <sup>4</sup> | 0.86     | 2.04     | 2.887(8)  | 168.4   |

<sup>1</sup>1+X,+Y,1+Z; <sup>2</sup>-1+X,+Y,-1+Z; <sup>3</sup>+X,+Y,1+Z; <sup>4</sup>1-X,1-Y,1-Z

Table 14 Hydrogen Atom Coordinates (Å×10<sup>4</sup>) and Isotropic Displacement Parameters (Å<sup>2</sup>×10<sup>3</sup>) for **2**.

| Atom | x     | y    | z    | U(eq) |
|------|-------|------|------|-------|
| H2A  | 11188 | 8272 | 9112 | 89    |
| H5A  | -850  | 6631 | 1143 | 98    |
| H2B  | 4607  | 8046 | 9227 | 68    |
| H5B  | 6119  | 7298 | 786  | 76    |
| H2C  | 7687  | 4964 | 8678 | 67    |
| H5C  | 2364  | 9899 | 1220 | 64    |
| H1A  | 8637  | 8336 | 8856 | 71    |
| H2AA | 12123 | 7614 | 8316 | 83    |
| H4A  | 10497 | 6931 | 7164 | 67    |

|      |      |       |      |     |
|------|------|-------|------|-----|
| H6A  | 9313 | 5644  | 6710 | 70  |
| H7A  | 8991 | 4989  | 5794 | 73  |
| H9A  | 6728 | 6772  | 5168 | 67  |
| H10A | 6981 | 7399  | 6089 | 59  |
| H12A | 4792 | 5617  | 4632 | 78  |
| H13A | 3128 | 6142  | 3950 | 66  |
| H15A | 6097 | 6343  | 2937 | 66  |
| H16A | 7746 | 5891  | 3620 | 69  |
| H17A | 1889 | 5777  | 2877 | 79  |
| H19A | -506 | 5756  | 1862 | 86  |
| H20A | 1011 | 7700  | 1284 | 80  |
| H1B  | 5787 | 7011  | 8805 | 64  |
| H3B  | 4396 | 9197  | 8662 | 65  |
| H5BA | 5442 | 9343  | 7525 | 55  |
| H7B  | 4966 | 8944  | 6393 | 58  |
| H8B  | 5714 | 9500  | 5617 | 59  |
| H10B | 9809 | 9280  | 6334 | 57  |
| H11B | 9068 | 8741  | 7122 | 51  |
| H13B | 7148 | 8287  | 4930 | 56  |
| H14B | 6184 | 7660  | 4040 | 57  |
| H16B | 6917 | 9700  | 3321 | 56  |
| H17B | 7817 | 10347 | 4233 | 57  |
| H18B | 7727 | 8465  | 2743 | 56  |
| H20B | 7856 | 8065  | 1548 | 68  |
| H21B | 4059 | 6856  | 1151 | 76  |
| H1C  | 8830 | 6240  | 8561 | 69  |
| H2CA | 5568 | 4632  | 7940 | 62  |
| H4C  | 4276 | 5643  | 7017 | 54  |
| H6C  | 4567 | 6206  | 5980 | 54  |
| H7C  | 2730 | 6554  | 5274 | 59  |
| H9C  | 1653 | 8185  | 6464 | 56  |
| H10C | 3427 | 7803  | 7163 | 53  |
| H12C | 3222 | 8176  | 5009 | 58  |
| H13C | 3907 | 8440  | 4143 | 54  |
| H15C | -50  | 7768  | 3281 | 70  |
| H16C | -694 | 7426  | 4141 | 72  |
| H17C | 1034 | 9182  | 3003 | 53  |
| H19C | 840  | 9989  | 1949 | 62  |
| H20C | 4175 | 8987  | 1456 | 63  |
| H03A | 535  | 5789  | -607 | 253 |
| H03B | 2173 | 5953  | -604 | 253 |

|      |       |       |      |     |
|------|-------|-------|------|-----|
| H03C | 1269  | 6658  | -421 | 253 |
| H02A | 11797 | 10117 | 9215 | 184 |
| H02B | 12822 | 10899 | 9394 | 184 |
| H02C | 11160 | 10961 | 9266 | 184 |

Table 14 Atomic Occupancy for **2**.

| Atom Occupancy |     | Atom Occupancy |     | Atom Occupancy |     |
|----------------|-----|----------------|-----|----------------|-----|
| F1             | 0.5 | F2             | 0.5 | F4             | 0.5 |
| F0AA           | 0.5 | B9             | 0.5 | F8             | 0.5 |
| F10            | 0.5 | F11            | 0.5 | F15            | 0.5 |
| B9A            | 0.5 | F1AA           | 0.5 | F5AA           | 0.5 |
| F7AA           | 0.5 | F1AB           | 0.5 | F0BA           | 0.5 |
| B2             | 0.5 | B2A            | 0.5 |                |     |

## Experimental

Single crystals of  $C_{64}H_{54}B_4F_{15.5}Fe_2N_{20}S_3$  **2** were crystallised using a vapour diffusion of diethyl ether into acetonitrile. A suitable crystal was selected and [mounted with parafin oil] on a Bruker APEX-II CCD diffractometer. The crystal was kept at 100 K during data collection. Using Olex2 [1], the structure was solved with the ShelXT [2] structure solution program using Intrinsic Phasing and refined with the ShelXL [3] refinement package using Least Squares minimisation.

1. Dolomanov, O.V., Bourhis, L.J., Gildea, R.J., Howard, J.A.K. & Puschmann, H. (2009), J. Appl. Cryst. 42, 339-341.
2. Sheldrick, G.M. (2015). Acta Cryst. A71, 3-8.
3. Sheldrick, G.M. (2015). Acta Cryst. C71, 3-8.

## Crystal structure determination of **2**

**Crystal Data** for  $C_{64}H_{54}B_4F_{15.5}Fe_2N_{20}S_3$  ( $M = 1648.89$  g/mol): triclinic, space group P-1 (no. 2),  $a = 9.5210(19)$  Å,  $b = 16.723(3)$  Å,  $c = 23.621(5)$  Å,  $\alpha = 95.29(3)^\circ$ ,  $\beta = 100.29(3)^\circ$ ,  $\gamma = 92.93(3)^\circ$ ,  $V = 3675.8(13)$  Å<sup>3</sup>,  $Z = 2$ ,  $T = 293(2)$  K,  $\mu(\text{MoK}\alpha) = 0.575$  mm<sup>-1</sup>,  $D_{\text{calc}} = 1.490$  g/cm<sup>3</sup>, 45853 reflections measured ( $1.762^\circ \leq 2\theta \leq 52.742^\circ$ ), 13521 unique ( $R_{\text{int}} = 0.0971$ ,  $R_{\text{sigma}} = 0.0898$ ) which were used in all calculations. The final  $R_1$  was 0.1086 ( $I > 2\sigma(I)$ ) and  $wR_2$  was 0.3308 (all data).

## Refinement model description

Number of restraints - 193, number of constraints - unknown.

## Details:

1. Fixed Uiso  
At 1.2 times of:  
All C(H) groups, All N(H) groups

At 1.5 times of:

All C(H,H,H) groups

## 2. Shared sites

{B9, B9A}

## 3. Restrained distances

F007-F006

2.25 with sigma of 0.02

F7AA-F2AA

2.25 with sigma of 0.02

F7AA-F1AA

2.25 with sigma of 0.02

F7AA-B2 = F2AA-B2 = F1AA-B2

1.4 with sigma of 0.02

B2-F1AA = B2-F2AA = B2-F7AA = B2-F0BA = B2-F1AB = B2-F5AA

1.4 with sigma of 0.02

B2A-F2AA = B2A-F7AA = B2A-F1AB = B2A-F5AA

1.39 with sigma of 0.02

B2-F1AA = B2-F2AA = B2-F0BA

1.39 with sigma of 0.02

F2AA-F1AA

2.25 with sigma of 0.04

F2AA-F7AA

2.25 with sigma of 0.04

F1AA-F0BA

2.25 with sigma of 0.04

F7AA-F0BA

2.25 with sigma of 0.04

F2AA-F0BA

2.25 with sigma of 0.04

F8-F10 ~ F8-F11 ~ F8-F15 ~ F10-F11 ~ F10-F15 ~ F11-F15

with sigma of 0.04

B9-F8 ~ B9-F10 ~ B9-F11 ~ B9-F15

with sigma of 0.02

F15-B9 ~ F0AA-B9 ~ F11-B9 ~ F1-B9 ~ F2-B9 ~ F10-B9 ~

F4-B9 ~ F8-B9

with sigma of 0.02

B9-F4 ~ B9-F10 ~ B9-F11 ~ B9-F15 ~ B9-F8 ~ B9-F0AA ~

B9-F2 ~ B9-F1

with sigma of 0.02

## 4. Uiso/Uanis restraints and constraints

Uanis(C030) ~ Ueq: with sigma of 0.1 and sigma for terminal atoms of 0.2

Uanis(B9) = Uanis(B9A)

## 5. Rigid body (RIGU) restrains

N02E, C02M, C02X

with sigma for 1-2 distances of 0.004 and sigma for 1-3 distances of 0.004

C030

with sigma for 1-2 distances of 0.004 and sigma for 1-3 distances of 0.004

C030, C02V

with sigma for 1-2 distances of 0.004 and sigma for 1-3 distances of 0.004

F3AA, F4AA, F6AA, F8AA

with sigma for 1-2 distances of 0.004 and sigma for 1-3 distances of 0.004

F1, F2, F4, F0AA, B9, F8, F10, F11, F15

with sigma for 1-2 distances of 0.004 and sigma for 1-3 distances of 0.004

F1AA, F2AA, F7AA, F0BA, B2

with sigma for 1-2 distances of 0.004 and sigma for 1-3 distances of 0.004

F1AA, F2AA, F5AA, F7AA, F1AB, F0BA, B2, B2A

with sigma for 1-2 distances of 0.004 and sigma for 1-3 distances of 0.004

F1, F2, F4, F0AA, B9, F8, F10, F11, F15, B9A

with sigma for 1-2 distances of 0.004 and sigma for 1-3 distances of 0.004

F8, F10, F11, F15, B9A

with sigma for 1-2 distances of 0.004 and sigma for 1-3 distances of 0.004

F1, F2, F4, F0AA, B9

with sigma for 1-2 distances of 0.004 and sigma for 1-3 distances of 0.004

#### 6. Others

Fixed Sof: F1(0.5) F2(0.5) F4(0.5) F0AA(0.5) B9(0.5) F8(0.5) F10(0.5)

F11(0.5) F15(0.5) B9A(0.5) F1AA(0.5) F5AA(0.5) F7AA(0.5) F1AB(0.5)

F0BA(0.5)

B2(0.5) B2A(0.5)

#### 7.a Aromatic/amide H refined with riding coordinates:

N2A(H2A), N5A(H5A), N2B(H2B), N5B(H5B), N2C(H2C), N5C(H5C), C1A(H1A),  
C2A(H2AA), C4A(H4A), C6A(H6A), C7A(H7A), C9A(H9A), C10A(H10A), C12A(H12A),  
C13A(H13A), C15A(H15A), C16A(H16A), C17A(H17A), C19A(H19A), C20A(H20A),  
C1B(H1B), C3B(H3B), C5B(H5BA), C7B(H7B), C8B(H8B), C10B(H10B), C11B(H11B),  
C13B(H13B), C14B(H14B), C16B(H16B), C17B(H17B), C18B(H18B), C20B(H20B),  
C21B(H21B), C1C(H1C), C2C(H2CA), C4C(H4C), C6C(H6C), C7C(H7C), C9C(H9C),  
C10C(H10C), C12C(H12C), C13C(H13C), C15C(H15C), C16C(H16C), C17C(H17C),  
C19C(H19C), C20C(H20C)

#### 7.b Idealised Me refined as rotating group:

C030(H03A,H03B,H03C), C02X(H02A,H02B,H02C)

Crystal data and structure refinement for **3**.

|                                             |                                                                                                               |
|---------------------------------------------|---------------------------------------------------------------------------------------------------------------|
| Identification code                         | FL204_a                                                                                                       |
| Empirical formula                           | C <sub>64</sub> H <sub>54</sub> B <sub>4</sub> F <sub>16</sub> Fe <sub>2</sub> N <sub>20</sub> O <sub>3</sub> |
| Formula weight                              | 1610.21                                                                                                       |
| Temperature/K                               | 100                                                                                                           |
| Crystal system                              | triclinic                                                                                                     |
| Space group                                 | P-1                                                                                                           |
| a/Å                                         | 13.837(3)                                                                                                     |
| b/Å                                         | 13.855(3)                                                                                                     |
| c/Å                                         | 20.684(4)                                                                                                     |
| α/°                                         | 77.43(3)                                                                                                      |
| β/°                                         | 77.58(3)                                                                                                      |
| γ/°                                         | 86.73(3)                                                                                                      |
| Volume/Å <sup>3</sup>                       | 3779.5(15)                                                                                                    |
| Z                                           | 2                                                                                                             |
| ρ <sub>calc</sub> /g/cm <sup>3</sup>        | 1.415                                                                                                         |
| μ/mm <sup>-1</sup>                          | 0.481                                                                                                         |
| F(000)                                      | 1636.0                                                                                                        |
| Crystal size/mm <sup>3</sup>                | 0.02 × 0.01 × 0.01                                                                                            |
| Radiation                                   | MoKα (λ = 0.71073)                                                                                            |
| 2Θ range for data collection/°              | 2.062 to 53.998                                                                                               |
| Index ranges                                | -17 ≤ h ≤ 17, -17 ≤ k ≤ 17, -26 ≤ l ≤ 26                                                                      |
| Reflections collected                       | 57096                                                                                                         |
| Independent reflections                     | 14860 [R <sub>int</sub> = 0.0446, R <sub>sigma</sub> = 0.0360]                                                |
| Data/restraints/parameters                  | 14860/33/1095                                                                                                 |
| Goodness-of-fit on F <sup>2</sup>           | 1.071                                                                                                         |
| Final R indexes [I ≥ 2σ (I)]                | R <sub>1</sub> = 0.0691, wR <sub>2</sub> = 0.1966                                                             |
| Final R indexes [all data]                  | R <sub>1</sub> = 0.0873, wR <sub>2</sub> = 0.2111                                                             |
| Largest diff. peak/hole / e Å <sup>-3</sup> | 1.21/-0.79                                                                                                    |

Table 15 Fractional Atomic Coordinates (×10<sup>4</sup>) and Equivalent Isotropic Displacement Parameters (Å<sup>2</sup>×10<sup>3</sup>) for **3**. U<sub>eq</sub> is defined as 1/3 of the trace of the orthogonalised U<sub>ij</sub> tensor.

| Atom | x         | y         | z          | U(eq)     |
|------|-----------|-----------|------------|-----------|
| Fe01 | 6322.1(4) | 2436.6(4) | 10428.6(3) | 27.99(14) |
| Fe02 | 7602.8(4) | 3648.4(4) | 4569.3(3)  | 28.78(15) |

|      |          |          |             |          |
|------|----------|----------|-------------|----------|
| O1A  | 6035(2)  | 186(2)   | 7692.9(15)  | 40.5(7)  |
| O1B  | 4740(2)  | 5195(2)  | 7461.2(18)  | 50.3(9)  |
| O1C  | 9843(2)  | 3910(3)  | 7292.3(15)  | 48.2(9)  |
| N1A  | 4952(3)  | 2648(2)  | 11084.0(19) | 37.7(8)  |
| N2A  | 3577(3)  | 2906(3)  | 11784(2)    | 54.6(11) |
| N3A  | 5238(2)  | 1887(2)  | 9967.4(17)  | 30.2(7)  |
| N4A  | 8062(2)  | 2354(2)  | 5213.4(17)  | 29.5(7)  |
| N5A  | 10417(3) | 3177(3)  | 3384(2)     | 50.4(10) |
| N6A  | 8971(2)  | 3370(3)  | 4016.8(18)  | 35.5(7)  |
| N1B  | 7258(3)  | 3258(3)  | 10810(2)    | 43.2(9)  |
| N2B  | 8331(3)  | 4005(4)  | 11160(3)    | 58.6(12) |
| N3B  | 6396(2)  | 3908(2)  | 9744(2)     | 36.1(8)  |
| N4B  | 6147(3)  | 3574(2)  | 5188(2)     | 39.3(8)  |
| N5B  | 6594(12) | 1694(8)  | 3598(6)     | 50(2)    |
| N6B  | 6703(9)  | 2730(11) | 4184(8)     | 29(3)    |
| N1C  | 6640(3)  | 1050(2)  | 11005.6(18) | 33.7(7)  |
| N2C  | 6849(3)  | -396(3)  | 11642(2)    | 48(1)    |
| N3C  | 7662(2)  | 1940(2)  | 9777.6(16)  | 28.6(6)  |
| N4C  | 8119(2)  | 4701(2)  | 5024.1(17)  | 30.7(7)  |
| N5C  | 7169(3)  | 6317(4)  | 3176(2)     | 63.5(13) |
| N6C  | 7398(3)  | 4972(3)  | 3913.6(19)  | 42.1(9)  |
| C1A  | 4574(4)  | 2911(3)  | 11659(3)    | 48.8(11) |
| C2A  | 3287(3)  | 2629(3)  | 11267(3)    | 46.0(11) |
| C3A  | 4147(3)  | 2457(3)  | 10830(2)    | 36.3(9)  |
| C4A  | 4332(3)  | 2058(3)  | 10232(2)    | 33.7(8)  |
| C5A  | 5417(3)  | 1461(3)  | 9383(2)     | 31.3(8)  |
| C6A  | 6022(3)  | 619(3)   | 9375(2)     | 30.1(8)  |
| C7A  | 6231(3)  | 202(3)   | 8810(2)     | 33.2(8)  |
| C8A  | 5837(3)  | 627(3)   | 8255(2)     | 35.6(9)  |
| C9A  | 5229(4)  | 1451(3)  | 8255(2)     | 42.8(10) |
| C10A | 5015(3)  | 1871(3)  | 8825(2)     | 38.0(9)  |
| C11A | 6519(3)  | 770(3)   | 7085(2)     | 35.2(9)  |
| C12A | 6385(3)  | 547(3)   | 6501(2)     | 33.5(8)  |
| C13A | 6892(3)  | 1080(3)  | 5881(2)     | 34.1(8)  |
| C14A | 7536(3)  | 1814(3)  | 5856(2)     | 30.5(8)  |
| C15A | 7638(5)  | 2054(4)  | 6448(3)     | 60.8(16) |
| C16A | 7129(5)  | 1534(4)  | 7061(2)     | 63.7(17) |
| C17A | 8916(3)  | 2019(3)  | 4974(2)     | 34.4(8)  |
| C18A | 9440(3)  | 2549(3)  | 4338(2)     | 35.0(9)  |
| C19A | 10354(3) | 2439(4)  | 3941(3)     | 46.5(11) |
| C20A | 9581(3)  | 3721(4)  | 3447(2)     | 45.3(11) |



|      |          |          |          |          |
|------|----------|----------|----------|----------|
| C1B  | 7803(4)  | 3184(4)  | 11276(3) | 53.6(12) |
| C2B  | 8164(4)  | 4643(4)  | 10611(3) | 52.0(12) |
| C3B  | 7488(3)  | 4178(3)  | 10403(3) | 41.1(10) |
| C4B  | 7027(3)  | 4491(3)  | 9838(3)  | 40.9(10) |
| C5B  | 5981(3)  | 4235(3)  | 9155(2)  | 35.5(9)  |
| C6B  | 4959(3)  | 4320(3)  | 9223(2)  | 34.9(9)  |
| C7B  | 4546(3)  | 4628(3)  | 8658(2)  | 35.8(9)  |
| C8B  | 5160(3)  | 4841(3)  | 8025(3)  | 43.3(11) |
| C9B  | 6179(3)  | 4759(4)  | 7951(3)  | 57.8(15) |
| C10B | 6587(3)  | 4452(4)  | 8521(3)  | 52.7(13) |
| C11B | 5119(3)  | 4785(3)  | 6901(3)  | 43.1(11) |
| C12B | 5169(4)  | 3771(3)  | 6962(3)  | 58.5(15) |
| C13B | 5498(4)  | 3369(3)  | 6402(3)  | 52.8(13) |
| C14B | 5782(3)  | 3992(3)  | 5768(2)  | 37.9(10) |
| C15B | 5719(3)  | 5009(3)  | 5713(2)  | 37.4(9)  |
| C16B | 5384(3)  | 5414(3)  | 6276(2)  | 36.8(9)  |
| C17B | 5574(4)  | 2956(3)  | 5064(3)  | 49.9(13) |
| C18B | 5791(11) | 2501(11) | 4602(9)  | 25(3)    |
| C19B | 5774(12) | 1833(10) | 4092(9)  | 40(4)    |
| C20B | 7366(11) | 2243(7)  | 3637(5)  | 40(2)    |
| C1C  | 6308(3)  | 444(3)   | 11586(2) | 41(1)    |
| C2C  | 7558(4)  | -339(3)  | 11075(2) | 46.0(11) |
| C3C  | 7439(3)  | 572(3)   | 10680(2) | 35.2(9)  |
| C4C  | 7964(3)  | 1075(3)  | 10030(2) | 33.5(8)  |
| C8C  | 9269(3)  | 3419(4)  | 7901(2)  | 41.3(10) |
| C4AA | 8760(9)  | 2522(9)  | 7922(6)  | 47(3)    |
| C3AA | 8211(8)  | 2064(9)  | 8551(6)  | 39(2)    |
| C5E  | 8211(3)  | 2440(3)  | 9135(2)  | 31.0(8)  |
| C9C  | 8413(8)  | 2922(9)  | 7931(5)  | 42(3)    |
| C10C | 7881(8)  | 2416(9)  | 8552(5)  | 40(2)    |
| C11C | 9394(3)  | 4097(4)  | 6734(2)  | 39.7(10) |
| C12C | 8562(3)  | 4686(4)  | 6740(2)  | 49.1(12) |
| C13C | 8133(3)  | 4903(4)  | 6172(2)  | 45.7(11) |
| C14C | 8551(3)  | 4515(3)  | 5612(2)  | 32.2(8)  |
| C15C | 9401(3)  | 3937(3)  | 5605(2)  | 31.4(8)  |
| C16C | 9820(3)  | 3722(3)  | 6179(2)  | 35.2(9)  |
| C17C | 7966(3)  | 5612(3)  | 4753(2)  | 34.2(8)  |
| C18C | 7577(3)  | 5793(3)  | 4147(2)  | 38.1(9)  |
| C19C | 7426(3)  | 6634(4)  | 3693(3)  | 50.4(12) |
| C20C | 7153(4)  | 5320(5)  | 3322(3)  | 57.0(14) |
| C1   | 8497(8)  | -770(8)  | 7338(6)  | 57(3)    |

|      |             |            |            |          |
|------|-------------|------------|------------|----------|
| C1AA | 9021(9)     | -326(8)    | 6732(9)    | 74(3)    |
| N3   | 9470(9)     | 0(9)       | 6180(8)    | 96(4)    |
| N031 | 8045(7)     | -1067(6)   | 9395(5)    | 54(2)    |
| C02S | 9601(5)     | -2038(6)   | 9629(4)    | 33.1(17) |
| C02W | 8752(6)     | -1464(5)   | 9482(4)    | 32.1(17) |
| N02Y | 11143(6)    | 2034(6)    | 5548(5)    | 50(2)    |
| C02X | 12022(7)    | 442(6)     | 5341(5)    | 41(2)    |
| C02Z | 11498(6)    | 1300(6)    | 5483(5)    | 38(2)    |
| F003 | 3058(2)     | 2667(2)    | 8124.0(14) | 51.4(7)  |
| F00D | 2701(3)     | 2997(2)    | 9183.9(16) | 62.2(8)  |
| F00G | 1491(2)     | 2503(2)    | 8752(2)    | 72.2(10) |
| F00H | 2127(3)     | 4024(2)    | 8324.2(17) | 69.1(9)  |
| B02R | 2333(4)     | 3054(4)    | 8609(3)    | 45.9(12) |
| F004 | 10153.1(19) | 5980(2)    | 8119.2(14) | 46.7(6)  |
| F006 | 8555.2(19)  | 6091(2)    | 7992.7(14) | 55.3(7)  |
| F00A | 8901(2)     | 5863(3)    | 9041.5(15) | 62.6(8)  |
| F00L | 9207(3)     | 7316(2)    | 8308(2)    | 74.4(10) |
| B02N | 9198(4)     | 6309(4)    | 8374(3)    | 41.3(11) |
| F008 | 3875(3)     | 1480.8(19) | 7005.0(14) | 56.4(8)  |
| F009 | 4012(2)     | -99(2)     | 6847.1(15) | 50.9(7)  |
| F00F | 4151(3)     | 1193(3)    | 5943.4(16) | 70.4(9)  |
| F00T | 2680(2)     | 861(3)     | 6642(2)    | 86.8(12) |
| B02P | 3685(4)     | 864(4)     | 6600(3)    | 46.0(12) |
| F005 | 7360(2)     | 6883(2)    | 6899.1(15) | 53.5(7)  |
| F00C | 6993(3)     | 7213(3)    | 5850.5(16) | 68.6(9)  |
| F00M | 7448(2)     | 8447(2)    | 6269(2)    | 76.7(11) |
| F00P | 5955(2)     | 7741(3)    | 6720(2)    | 83.0(12) |
| B02Q | 6933(4)     | 7573(5)    | 6424(3)    | 50.0(13) |
| C2   | 10751(13)   | 1486(13)   | 7679(9)    | 39(4)    |
| N4   | 10054(14)   | 531(14)    | 8835(10)   | 61(5)    |
| C5   | 10357(15)   | 959(15)    | 8298(11)   | 49(4)    |
| N0AA | 11693(10)   | -1148(10)  | 7611(7)    | 37(3)    |
| C0AA | 11206(12)   | -385(11)   | 7676(9)    | 34(3)    |
| C2AA | 10714(12)   | 595(12)    | 7715(9)    | 38(3)    |
| N1AA | 7088(8)     | 2740(12)   | 4121(9)    | 31(3)    |
| C5AA | 6826(9)     | 2182(9)    | 3709(5)    | 37(2)    |
| N2AA | 6021(10)    | 1627(9)    | 3830(7)    | 36(2)    |
| C6AA | 5350(9)     | 1816(8)    | 4382(7)    | 36(3)    |
| C7AA | 6112(11)    | 2502(11)   | 4407(10)   | 27(3)    |
| C7D  | 9443(3)     | 3621(3)    | 8479(2)    | 32.3(6)  |
| C6D  | 8901(3)     | 3133(3)    | 9100(2)    | 32.3(6)  |

Table 16 Anisotropic Displacement Parameters ( $\text{\AA}^2 \times 10^3$ ) for **3**. The Anisotropic displacement factor exponent takes the form:  $-2\pi^2[h^2a^{*2}U_{11}+2hka^*b^*U_{12}+\dots]$ .

| Atom | U <sub>11</sub> | U <sub>22</sub> | U <sub>33</sub> | U <sub>23</sub> | U <sub>13</sub> | U <sub>12</sub> |
|------|-----------------|-----------------|-----------------|-----------------|-----------------|-----------------|
| Fe01 | 26.7(3)         | 27.5(3)         | 28.7(3)         | -7.8(2)         | -0.9(2)         | -3.17(19)       |
| Fe02 | 30.1(3)         | 28.2(3)         | 27.4(3)         | -4.5(2)         | -5.0(2)         | -4.5(2)         |
| O1A  | 62.2(19)        | 29.0(14)        | 28.5(17)        | -10.5(11)       | 3.0(14)         | -15.7(13)       |
| O1B  | 38.7(16)        | 45.9(17)        | 51(2)           | 6.5(14)         | 3.1(15)         | 17.3(13)        |
| O1C  | 32.8(15)        | 83(2)           | 25.4(16)        | 4.2(15)         | -8.1(13)        | -25.4(15)       |
| N1A  | 45.6(19)        | 31.0(17)        | 37(2)           | -12.8(14)       | -2.2(17)        | -6.9(14)        |
| N2A  | 56(2)           | 60(3)           | 45(3)           | -31(2)          | 17(2)           | -12.6(19)       |
| N3A  | 37.5(17)        | 22.4(14)        | 29.4(19)        | -7.0(12)        | -2.3(14)        | -2.6(12)        |
| N4A  | 28.0(15)        | 31.9(16)        | 28.1(18)        | -6.3(12)        | -5.5(13)        | 0.8(12)         |
| N5A  | 34.4(19)        | 76(3)           | 33(2)           | -6.7(19)        | 6.8(17)         | -6.0(18)        |
| N6A  | 29.2(16)        | 39.8(18)        | 33(2)           | -0.1(14)        | -5.0(15)        | -2.4(13)        |
| N1B  | 28.3(16)        | 70(3)           | 35(2)           | -22.3(18)       | -3.6(16)        | 2.9(16)         |
| N2B  | 43(2)           | 77(3)           | 63(3)           | -40(3)          | 1(2)            | -13(2)          |
| N3B  | 26.6(15)        | 33.6(17)        | 49(2)           | -19.4(15)       | 2.6(15)         | -2.4(12)        |
| N4B  | 45.1(19)        | 25.5(15)        | 51(2)           | 1.5(14)         | -27.1(18)       | -5.3(13)        |
| N5B  | 77(8)           | 44(5)           | 35(6)           | -18(4)          | -18(6)          | -1(6)           |
| N6B  | 28(8)           | 25(4)           | 33(7)           | -5(4)           | -9(8)           | 5(6)            |
| N1C  | 39.8(17)        | 29.4(16)        | 29(2)           | -7.2(13)        | -0.2(15)        | -2.8(13)        |
| N2C  | 70(3)           | 33.9(18)        | 34(2)           | 3.0(15)         | -7(2)           | -6.3(17)        |
| N3C  | 32.7(15)        | 28.4(15)        | 24.6(18)        | -8.9(12)        | -2.5(14)        | 0.3(12)         |
| N4C  | 22.4(14)        | 40.8(17)        | 28.2(18)        | -5.4(13)        | -5.3(13)        | -1.6(12)        |
| N5C  | 54(3)           | 81(3)           | 52(3)           | 13(2)           | -29(2)          | -13(2)          |
| N6C  | 31.5(17)        | 59(2)           | 38(2)           | -7.7(17)        | -10.8(16)       | -7.5(15)        |
| C1A  | 65(3)           | 41(2)           | 42(3)           | -20(2)          | -2(2)           | -10(2)          |
| C2A  | 42(2)           | 42(2)           | 52(3)           | -21(2)          | 7(2)            | -5.9(18)        |
| C3A  | 36(2)           | 28.0(18)        | 43(3)           | -12.6(16)       | 1.9(18)         | -4.4(15)        |
| C4A  | 34.0(19)        | 27.5(18)        | 39(2)           | -10.7(15)       | -3.0(18)        | -3.5(14)        |
| C5A  | 37.3(19)        | 23.5(17)        | 31(2)           | -8.1(14)        | -0.3(17)        | -4.8(14)        |
| C6A  | 31.6(18)        | 27.5(17)        | 28(2)           | -4.8(14)        | -0.4(16)        | -4.7(14)        |
| C7A  | 37(2)           | 25.4(17)        | 34(2)           | -7.9(15)        | 2.3(17)         | -5.0(14)        |
| C8A  | 52(2)           | 25.1(17)        | 28(2)           | -7.1(15)        | 0.3(19)         | -11.7(16)       |
| C9A  | 67(3)           | 26.6(19)        | 38(3)           | -6.8(16)        | -19(2)          | -1.6(18)        |
| C10A | 54(2)           | 24.8(18)        | 36(2)           | -7.9(15)        | -10(2)          | 0.7(16)         |
| C11A | 45(2)           | 29.6(18)        | 30(2)           | -9.4(15)        | -0.7(18)        | -7.1(16)        |
| C12A | 39(2)           | 28.2(18)        | 34(2)           | -10.0(15)       | -5.0(18)        | -3.2(15)        |
| C13A | 40(2)           | 31.8(19)        | 33(2)           | -11.5(16)       | -7.8(18)        | -2.3(15)        |

|      |          |          |        |           |           |           |
|------|----------|----------|--------|-----------|-----------|-----------|
| C14A | 30.4(18) | 32.1(18) | 29(2)  | -7.4(15)  | -4.8(16)  | 0.7(14)   |
| C15A | 88(4)    | 64(3)    | 32(3)  | -7(2)     | -8(3)     | -46(3)    |
| C16A | 97(4)    | 70(3)    | 26(3)  | -11(2)    | -4(3)     | -50(3)    |
| C17A | 37(2)    | 36(2)    | 30(2)  | -7.8(16)  | -6.4(17)  | 6.1(16)   |
| C18A | 33.4(19) | 40(2)    | 30(2)  | -6.3(16)  | -5.3(17)  | 5.5(16)   |
| C19A | 37(2)    | 60(3)    | 41(3)  | -13(2)    | -3(2)     | 10(2)     |
| C20A | 37(2)    | 56(3)    | 35(3)  | 6(2)      | -3.1(19)  | -9.7(19)  |
| C1B  | 47(3)    | 71(3)    | 39(3)  | -16(2)    | 4(2)      | 4(2)      |
| C2B  | 44(2)    | 60(3)    | 57(3)  | -26(2)    | -5(2)     | -6(2)     |
| C3B  | 31.9(19) | 42(2)    | 52(3)  | -27(2)    | 2(2)      | -5.0(16)  |
| C4B  | 28.1(18) | 32(2)    | 65(3)  | -22.8(19) | -1(2)     | -1.2(15)  |
| C5B  | 29.5(18) | 27.6(18) | 47(3)  | -10.0(16) | -1.1(18)  | 0.8(14)   |
| C6B  | 27.9(18) | 32.2(19) | 41(3)  | -15.3(16) | 7.3(17)   | 0.1(14)   |
| C7B  | 25.2(17) | 28.7(18) | 49(3)  | -11.3(17) | 3.6(17)   | 2.2(14)   |
| C8B  | 35(2)    | 33(2)    | 51(3)  | 2.6(18)   | 2(2)      | 7.7(16)   |
| C9B  | 30(2)    | 68(3)    | 53(3)  | 16(2)     | 8(2)      | 12(2)     |
| C10B | 25.1(19) | 58(3)    | 59(3)  | 3(2)      | 8(2)      | 1.5(18)   |
| C11B | 27.4(19) | 39(2)    | 53(3)  | 0.5(19)   | 0.4(19)   | 9.5(16)   |
| C12B | 55(3)    | 35(2)    | 62(4)  | 13(2)     | 13(3)     | 9(2)      |
| C13B | 47(3)    | 27(2)    | 68(4)  | 9(2)      | 3(2)      | 2.6(18)   |
| C14B | 30.3(19) | 29.2(19) | 53(3)  | 1.6(17)   | -15.4(19) | -1.7(15)  |
| C15B | 31.8(19) | 28.7(18) | 49(3)  | 5.5(17)   | -15.9(19) | -1.5(15)  |
| C16B | 26.7(18) | 30.3(19) | 49(3)  | 3.6(17)   | -11.0(18) | 0.4(14)   |
| C17B | 43(2)    | 28(2)    | 87(4)  | -5(2)     | -38(3)    | -0.3(17)  |
| C18B | 18(7)    | 23(4)    | 30(10) | -3(5)     | 0(5)      | -2(5)     |
| C19B | 44(9)    | 46(6)    | 41(14) | -27(7)    | -16(9)    | 12(6)     |
| C20B | 52(6)    | 39(5)    | 35(6)  | -14(4)    | -13(5)    | -3(5)     |
| C1C  | 50(2)    | 36(2)    | 33(3)  | -7.4(17)  | 4(2)      | -8.4(18)  |
| C2C  | 60(3)    | 35(2)    | 40(3)  | -5.0(18)  | -10(2)    | 9.8(19)   |
| C3C  | 39(2)    | 31.1(19) | 34(2)  | -6.1(16)  | -5.9(18)  | 4.2(15)   |
| C4C  | 33.7(19) | 36(2)    | 30(2)  | -9.3(16)  | -2.1(17)  | 5.5(15)   |
| C8C  | 35(2)    | 61(3)    | 26(2)  | -3.0(18)  | -5.4(18)  | -16.4(18) |
| C4AA | 45(6)    | 64(6)    | 32(5)  | -12(4)    | -1(4)     | -12(4)    |
| C3AA | 36(5)    | 47(6)    | 34(4)  | -15(4)    | -2(4)     | -7(4)     |
| C5E  | 32.2(18) | 32.7(18) | 27(2)  | -8.1(14)  | -2.8(16)  | -1.7(14)  |
| C9C  | 39(5)    | 67(7)    | 24(4)  | -13(4)    | -4(4)     | -26(5)    |
| C10C | 29(5)    | 59(7)    | 29(4)  | -9(4)     | 1(3)      | -17(4)    |
| C11C | 28.1(18) | 64(3)    | 25(2)  | 0.8(18)   | -7.3(17)  | -16.5(18) |
| C12C | 25.7(19) | 92(4)    | 33(3)  | -23(2)    | -2.0(19)  | -8(2)     |
| C13C | 25.7(19) | 73(3)    | 40(3)  | -18(2)    | -7.2(19)  | 2.5(19)   |
| C14C | 25.1(17) | 43(2)    | 27(2)  | -2.5(16)  | -6.7(16)  | -7.3(15)  |

|      |          |          |          |           |           |           |
|------|----------|----------|----------|-----------|-----------|-----------|
| C15C | 28.4(17) | 36.6(19) | 27(2)    | -2.5(15)  | -4.3(16)  | -6.7(14)  |
| C16C | 29.1(18) | 42(2)    | 31(2)    | 3.6(16)   | -10.0(17) | -7.4(15)  |
| C17C | 29.4(18) | 40(2)    | 33(2)    | -5.4(16)  | -7.5(17)  | -4.7(15)  |
| C18C | 31.8(19) | 42(2)    | 39(3)    | -1.1(17)  | -12.2(18) | -4.9(16)  |
| C19C | 39(2)    | 55(3)    | 54(3)    | 7(2)      | -20(2)    | -7(2)     |
| C20C | 39(2)    | 96(4)    | 41(3)    | -14(3)    | -15(2)    | -11(2)    |
| C1   | 60(6)    | 46(5)    | 67(7)    | -4(5)     | -30(6)    | 16(5)     |
| C1AA | 56(6)    | 44(6)    | 120(10)  | 4(6)      | -35(6)    | -1(5)     |
| N3   | 71(7)    | 67(7)    | 133(10)  | 19(6)     | -27(6)    | -1(5)     |
| N031 | 64(5)    | 49(4)    | 71(6)    | -39(4)    | -45(5)    | 29(4)     |
| C02S | 27(3)    | 42(4)    | 36(5)    | -13(3)    | -19(3)    | 14(3)     |
| C02W | 43(4)    | 26(3)    | 42(5)    | -21(3)    | -28(4)    | 7(3)      |
| N02Y | 59(5)    | 42(4)    | 65(6)    | -32(4)    | -33(4)    | 21(4)     |
| C02X | 56(5)    | 33(4)    | 38(5)    | -20(3)    | -10(4)    | 16(4)     |
| C02Z | 30(4)    | 50(5)    | 49(6)    | -35(4)    | -25(4)    | 19(3)     |
| F003 | 64.1(17) | 48.2(15) | 43.3(17) | -10.2(12) | -17.3(14) | 12.3(13)  |
| F00D | 77(2)    | 67.9(19) | 45.9(19) | -17.6(14) | -19.4(16) | 6.9(16)   |
| F00G | 49.9(17) | 48.3(17) | 118(3)   | -8.8(17)  | -26.4(18) | 5.0(13)   |
| F00H | 113(3)   | 31.9(14) | 69(2)    | -16.5(13) | -32(2)    | 15.5(15)  |
| B02R | 59(3)    | 33(2)    | 50(3)    | -14(2)    | -16(3)    | 7(2)      |
| F004 | 39.0(13) | 59.0(16) | 45.6(17) | -15.0(12) | -12.6(12) | 2.0(11)   |
| F006 | 34.6(13) | 93(2)    | 37.7(16) | -13.0(14) | -6.8(12)  | -6.7(13)  |
| F00A | 73(2)    | 80(2)    | 31.3(16) | -6.9(14)  | -5.6(15)  | -10.3(16) |
| F00L | 88(2)    | 44.2(17) | 89(3)    | -14.5(16) | -15(2)    | 4.0(16)   |
| B02N | 45(3)    | 44(3)    | 35(3)    | -9(2)     | -7(2)     | -1(2)     |
| F008 | 94(2)    | 36.2(13) | 39.2(16) | -8.1(11)  | -13.5(16) | -6.4(14)  |
| F009 | 60.4(16) | 44.8(14) | 50.2(18) | -16.8(12) | -10.6(14) | -0.7(12)  |
| F00F | 90(2)    | 81(2)    | 36.3(18) | -9.5(15)  | -9.1(17)  | -2.7(18)  |
| F00T | 46.9(18) | 103(3)   | 113(3)   | -31(2)    | -14(2)    | -3.5(18)  |
| B02P | 48(3)    | 53(3)    | 39(3)    | -13(2)    | -7(2)     | -3(2)     |
| F005 | 45.4(14) | 73.4(19) | 43.4(17) | -20.0(14) | -8.3(13)  | 11.3(13)  |
| F00C | 81(2)    | 84(2)    | 49(2)    | -23.3(16) | -19.8(18) | -3.5(18)  |
| F00M | 59.0(19) | 55.1(18) | 121(3)   | -36.8(19) | -14(2)    | 13.1(15)  |
| F00P | 33.3(15) | 144(4)   | 78(3)    | -36(2)    | -19.1(16) | 19.9(18)  |
| B02Q | 34(2)    | 70(4)    | 53(4)    | -26(3)    | -14(3)    | 7(2)      |
| N1AA | 30(7)    | 34(4)    | 28(5)    | -6(3)     | -4(7)     | 3(6)      |
| C5AA | 35(5)    | 41(6)    | 30(6)    | 1(4)      | -4(5)     | -2(5)     |
| N2AA | 38(6)    | 39(6)    | 29(8)    | -7(4)     | 0(5)      | -8(5)     |
| C6AA | 37(6)    | 41(5)    | 32(8)    | -13(4)    | -6(5)     | 1(4)      |
| C7AA | 19(9)    | 33(5)    | 29(11)   | -12(6)    | 0(6)      | 2(6)      |
| C7D  | 28.2(12) | 38.0(14) | 31.6(16) | -8.6(11)  | -6.3(12)  | -2.1(10)  |

C6D      28.2(12)      38.0(14)      31.6(16)      -8.6(11)      -6.3(12)      -2.1(10)

Table 17 Bond Lengths for **3**.

| Atom | Atom | Length/Å  | Atom | Atom | Length/Å  |
|------|------|-----------|------|------|-----------|
| Fe01 | N1A  | 2.127(4)  | C17A | C18A | 1.424(6)  |
| Fe01 | N3A  | 2.191(3)  | C18A | C19A | 1.371(6)  |
| Fe01 | N1B  | 2.144(4)  | C2B  | C3B  | 1.356(6)  |
| Fe01 | N3B  | 2.209(4)  | C3B  | C4B  | 1.424(7)  |
| Fe01 | N1C  | 2.107(3)  | C5B  | C6B  | 1.391(5)  |
| Fe01 | N3C  | 2.215(3)  | C5B  | C10B | 1.377(7)  |
| Fe02 | N4A  | 2.142(3)  | C6B  | C7B  | 1.386(6)  |
| Fe02 | N6A  | 2.053(4)  | C7B  | C8B  | 1.380(6)  |
| Fe02 | N4B  | 2.137(4)  | C8B  | C9B  | 1.387(6)  |
| Fe02 | N6B  | 2.202(15) | C9B  | C10B | 1.390(8)  |
| Fe02 | N4C  | 2.128(3)  | C11B | C12B | 1.382(6)  |
| Fe02 | N6C  | 2.075(4)  | C11B | C16B | 1.382(6)  |
| Fe02 | N1AA | 1.961(17) | C12B | C13B | 1.373(8)  |
| O1A  | C8A  | 1.398(5)  | C13B | C14B | 1.393(6)  |
| O1A  | C11A | 1.394(5)  | C14B | C15B | 1.388(6)  |
| O1B  | C8B  | 1.396(6)  | C15B | C16B | 1.380(7)  |
| O1B  | C11B | 1.390(6)  | C17B | C18B | 1.232(18) |
| O1C  | C8C  | 1.392(5)  | C17B | C7AA | 1.637(18) |
| O1C  | C11C | 1.395(5)  | C18B | C6AA | 1.36(2)   |
| N1A  | C1A  | 1.313(6)  | C19B | C7AA | 1.39(2)   |
| N1A  | C3A  | 1.390(5)  | C20B | N1AA | 1.31(2)   |
| N2A  | C1A  | 1.348(7)  | C2C  | C3C  | 1.368(6)  |
| N2A  | C2A  | 1.352(7)  | C3C  | C4C  | 1.432(6)  |
| N3A  | C4A  | 1.287(5)  | C8C  | C4AA | 1.450(13) |
| N3A  | C5A  | 1.428(5)  | C8C  | C9C  | 1.386(10) |
| N4A  | C14A | 1.439(5)  | C8C  | C7D  | 1.358(6)  |
| N4A  | C17A | 1.282(5)  | C4AA | C3AA | 1.393(15) |
| N5A  | C19A | 1.354(6)  | C3AA | C5E  | 1.415(12) |
| N5A  | C20A | 1.343(6)  | C5E  | C10C | 1.385(12) |
| N6A  | C18A | 1.389(5)  | C5E  | C6D  | 1.373(5)  |
| N6A  | C20A | 1.307(6)  | C9C  | C10C | 1.394(14) |
| N1B  | C1B  | 1.329(6)  | C11C | C12C | 1.372(7)  |
| N1B  | C3B  | 1.378(6)  | C11C | C16C | 1.367(7)  |
| N2B  | C1B  | 1.337(7)  | C12C | C13C | 1.395(6)  |
| N2B  | C2B  | 1.334(7)  | C13C | C14C | 1.383(6)  |

|      |      |           |      |      |           |
|------|------|-----------|------|------|-----------|
| N3B  | C4B  | 1.293(5)  | C14C | C15C | 1.385(6)  |
| N3B  | C5B  | 1.433(6)  | C15C | C16C | 1.398(5)  |
| N4B  | C14B | 1.427(6)  | C17C | C18C | 1.435(6)  |
| N4B  | C17B | 1.300(5)  | C18C | C19C | 1.366(6)  |
| N5B  | C19B | 1.390(19) | C1   | C1AA | 1.341(18) |
| N5B  | C20B | 1.372(15) | C1AA | N3   | 1.182(19) |
| N6B  | C18B | 1.378(13) | N031 | C02W | 1.124(10) |
| N6B  | C5AA | 1.35(2)   | C02S | C02W | 1.430(9)  |
| N1C  | C1C  | 1.314(5)  | N02Y | C02Z | 1.126(10) |
| N1C  | C3C  | 1.381(5)  | C02X | C02Z | 1.410(10) |
| N2C  | C1C  | 1.343(6)  | F003 | B02R | 1.427(6)  |
| N2C  | C2C  | 1.348(6)  | F00D | B02R | 1.377(6)  |
| N3C  | C4C  | 1.284(5)  | F00G | B02R | 1.372(7)  |
| N3C  | C5E  | 1.432(5)  | F00H | B02R | 1.385(6)  |
| N4C  | C14C | 1.435(5)  | F004 | B02N | 1.404(6)  |
| N4C  | C17C | 1.290(5)  | F006 | B02N | 1.393(6)  |
| N5C  | C19C | 1.359(7)  | F00A | B02N | 1.368(6)  |
| N5C  | C20C | 1.349(8)  | F00L | B02N | 1.372(6)  |
| N6C  | C18C | 1.382(6)  | F008 | B02P | 1.390(6)  |
| N6C  | C20C | 1.321(6)  | F009 | B02P | 1.407(6)  |
| C2A  | C3A  | 1.374(6)  | F00F | B02P | 1.363(7)  |
| C3A  | C4A  | 1.431(6)  | F00T | B02P | 1.376(6)  |
| C5A  | C6A  | 1.398(5)  | F005 | B02Q | 1.416(7)  |
| C5A  | C10A | 1.385(6)  | F00C | B02Q | 1.370(7)  |
| C6A  | C7A  | 1.384(6)  | F00M | B02Q | 1.381(7)  |
| C7A  | C8A  | 1.378(6)  | F00P | B02Q | 1.389(6)  |
| C8A  | C9A  | 1.378(6)  | C2   | C5   | 1.35(3)   |
| C9A  | C10A | 1.395(6)  | N4   | C5   | 1.14(3)   |
| C11A | C12A | 1.361(6)  | N0AA | C0AA | 1.24(2)   |
| C11A | C16A | 1.377(6)  | C0AA | C2AA | 1.49(2)   |
| C12A | C13A | 1.394(6)  | N1AA | C7AA | 1.380(13) |
| C13A | C14A | 1.375(5)  | C5AA | N2AA | 1.338(17) |
| C14A | C15A | 1.374(6)  | N2AA | C6AA | 1.371(16) |
| C15A | C16A | 1.378(7)  | C7D  | C6D  | 1.390(6)  |

Table 18 Bond Angles for **3**.

| Atom | Atom | Atom | Angle/°   | Atom | Atom | Atom | Angle/°  |
|------|------|------|-----------|------|------|------|----------|
| N1A  | Fe01 | N3A  | 76.95(13) | N5A  | C19A | C18A | 105.7(4) |
| N1A  | Fe01 | N1B  | 98.98(14) | N6A  | C20A | N5A  | 110.8(4) |

|      |      |      |            |      |      |      |           |
|------|------|------|------------|------|------|------|-----------|
| N1A  | Fe01 | N3B  | 97.54(13)  | N1B  | C1B  | N2B  | 109.9(5)  |
| N1A  | Fe01 | N3C  | 169.74(12) | N2B  | C2B  | C3B  | 103.5(5)  |
| N3A  | Fe01 | N3B  | 93.40(12)  | N1B  | C3B  | C4B  | 118.3(4)  |
| N3A  | Fe01 | N3C  | 96.79(12)  | C2B  | C3B  | N1B  | 111.9(5)  |
| N1B  | Fe01 | N3A  | 168.52(14) | C2B  | C3B  | C4B  | 129.8(5)  |
| N1B  | Fe01 | N3B  | 76.36(15)  | N3B  | C4B  | C3B  | 118.3(4)  |
| N1B  | Fe01 | N3C  | 88.66(13)  | C6B  | C5B  | N3B  | 119.7(4)  |
| N3B  | Fe01 | N3C  | 90.87(12)  | C10B | C5B  | N3B  | 120.3(4)  |
| N1C  | Fe01 | N1A  | 95.28(14)  | C10B | C5B  | C6B  | 119.9(4)  |
| N1C  | Fe01 | N3A  | 95.78(12)  | C7B  | C6B  | C5B  | 120.4(4)  |
| N1C  | Fe01 | N1B  | 95.29(15)  | C8B  | C7B  | C6B  | 119.2(4)  |
| N1C  | Fe01 | N3B  | 165.64(13) | C7B  | C8B  | O1B  | 118.8(4)  |
| N1C  | Fe01 | N3C  | 77.10(13)  | C7B  | C8B  | C9B  | 120.9(5)  |
| N4A  | Fe02 | N6B  | 90.2(4)    | C9B  | C8B  | O1B  | 120.3(4)  |
| N6A  | Fe02 | N4A  | 78.41(13)  | C8B  | C9B  | C10B | 119.5(5)  |
| N6A  | Fe02 | N4B  | 166.71(13) | C5B  | C10B | C9B  | 120.1(4)  |
| N6A  | Fe02 | N6B  | 98.9(4)    | C12B | C11B | O1B  | 120.6(4)  |
| N6A  | Fe02 | N4C  | 94.98(14)  | C16B | C11B | O1B  | 118.4(4)  |
| N6A  | Fe02 | N6C  | 94.23(14)  | C16B | C11B | C12B | 120.9(5)  |
| N4B  | Fe02 | N4A  | 91.49(13)  | C13B | C12B | C11B | 120.4(5)  |
| N4B  | Fe02 | N6B  | 72.2(4)    | C12B | C13B | C14B | 119.6(4)  |
| N4C  | Fe02 | N4A  | 96.81(12)  | C13B | C14B | N4B  | 119.5(4)  |
| N4C  | Fe02 | N4B  | 94.79(13)  | C15B | C14B | N4B  | 121.1(4)  |
| N4C  | Fe02 | N6B  | 165.5(4)   | C15B | C14B | C13B | 119.4(5)  |
| N6C  | Fe02 | N4A  | 170.64(13) | C16B | C15B | C14B | 121.2(4)  |
| N6C  | Fe02 | N4B  | 96.62(14)  | C15B | C16B | C11B | 118.6(4)  |
| N6C  | Fe02 | N6B  | 96.8(4)    | N4B  | C17B | C7AA | 111.2(7)  |
| N6C  | Fe02 | N4C  | 77.89(14)  | C18B | C17B | N4B  | 125.2(8)  |
| N1AA | Fe02 | N4A  | 86.4(5)    | C17B | C18B | N6B  | 114.4(14) |
| N1AA | Fe02 | N6A  | 86.2(4)    | C17B | C18B | C6AA | 136.3(12) |
| N1AA | Fe02 | N4B  | 84.5(4)    | C6AA | C18B | N6B  | 109.3(13) |
| N1AA | Fe02 | N4C  | 176.7(5)   | N5B  | C19B | C7AA | 103.0(12) |
| N1AA | Fe02 | N6C  | 99.0(5)    | N1AA | C20B | N5B  | 110.1(12) |
| C11A | O1A  | C8A  | 116.2(3)   | N1C  | C1C  | N2C  | 110.7(4)  |
| C11B | O1B  | C8B  | 115.5(3)   | N2C  | C2C  | C3C  | 105.7(4)  |
| C8C  | O1C  | C11C | 116.0(3)   | N1C  | C3C  | C4C  | 118.0(3)  |
| C1A  | N1A  | Fe01 | 142.3(3)   | C2C  | C3C  | N1C  | 109.1(4)  |
| C1A  | N1A  | C3A  | 105.6(4)   | C2C  | C3C  | C4C  | 132.8(4)  |
| C3A  | N1A  | Fe01 | 112.1(3)   | N3C  | C4C  | C3C  | 118.5(4)  |
| C1A  | N2A  | C2A  | 108.8(4)   | O1C  | C8C  | C4AA | 119.7(6)  |
| C4A  | N3A  | Fe01 | 114.2(3)   | C9C  | C8C  | O1C  | 122.5(5)  |



|      |     |      |           |      |      |      |           |
|------|-----|------|-----------|------|------|------|-----------|
| C4A  | N3A | C5A  | 117.3(3)  | C7D  | C8C  | O1C  | 117.1(4)  |
| C5A  | N3A | Fe01 | 128.2(3)  | C7D  | C8C  | C9C  | 118.8(6)  |
| C14A | N4A | Fe02 | 128.9(2)  | C3AA | C4AA | C8C  | 116.4(10) |
| C17A | N4A | Fe02 | 114.0(3)  | C4AA | C3AA | C5E  | 120.5(10) |
| C17A | N4A | C14A | 117.1(3)  | C3AA | C5E  | N3C  | 119.4(6)  |
| C20A | N5A | C19A | 108.7(4)  | C10C | C5E  | N3C  | 119.4(5)  |
| C18A | N6A | Fe02 | 112.9(3)  | C6D  | C5E  | N3C  | 120.4(3)  |
| C20A | N6A | Fe02 | 140.9(3)  | C6D  | C5E  | C10C | 118.2(6)  |
| C20A | N6A | C18A | 106.2(4)  | C8C  | C9C  | C10C | 120.2(9)  |
| C1B  | N1B | Fe01 | 143.1(4)  | C5E  | C10C | C9C  | 118.8(9)  |
| C1B  | N1B | C3B  | 103.8(4)  | C12C | C11C | O1C  | 119.7(4)  |
| C3B  | N1B | Fe01 | 112.7(3)  | C16C | C11C | O1C  | 119.0(4)  |
| C2B  | N2B | C1B  | 110.9(5)  | C16C | C11C | C12C | 121.3(4)  |
| C4B  | N3B | Fe01 | 113.6(3)  | C11C | C12C | C13C | 119.7(5)  |
| C4B  | N3B | C5B  | 116.4(4)  | C14C | C13C | C12C | 119.4(4)  |
| C5B  | N3B | Fe01 | 129.0(2)  | C13C | C14C | N4C  | 121.1(4)  |
| C14B | N4B | Fe02 | 128.7(2)  | C13C | C14C | C15C | 120.5(4)  |
| C17B | N4B | Fe02 | 113.7(4)  | C15C | C14C | N4C  | 118.4(4)  |
| C17B | N4B | C14B | 116.9(4)  | C14C | C15C | C16C | 119.4(4)  |
| C20B | N5B | C19B | 109.4(10) | C11C | C16C | C15C | 119.6(4)  |
| C18B | N6B | Fe02 | 113.3(12) | N4C  | C17C | C18C | 116.9(4)  |
| C5AA | N6B | Fe02 | 138.4(11) | N6C  | C18C | C17C | 116.7(4)  |
| C5AA | N6B | C18B | 107.2(12) | C19C | C18C | N6C  | 109.9(4)  |
| C1C  | N1C | Fe01 | 141.0(3)  | C19C | C18C | C17C | 133.1(4)  |
| C1C  | N1C | C3C  | 105.8(3)  | N5C  | C19C | C18C | 105.2(5)  |
| C3C  | N1C | Fe01 | 113.2(3)  | N6C  | C20C | N5C  | 110.3(5)  |
| C1C  | N2C | C2C  | 108.7(4)  | N3   | C1AA | C1   | 174.8(16) |
| C4C  | N3C | Fe01 | 113.1(3)  | N031 | C02W | C02S | 175.0(10) |
| C4C  | N3C | C5E  | 117.6(3)  | N02Y | C02Z | C02X | 173.5(12) |
| C5E  | N3C | Fe01 | 129.4(2)  | F00D | B02R | F003 | 108.9(4)  |
| C14C | N4C | Fe02 | 127.9(3)  | F00D | B02R | F00H | 111.2(4)  |
| C17C | N4C | Fe02 | 114.7(3)  | F00G | B02R | F003 | 108.4(4)  |
| C17C | N4C | C14C | 117.3(3)  | F00G | B02R | F00D | 110.6(5)  |
| C20C | N5C | C19C | 109.0(4)  | F00G | B02R | F00H | 109.4(4)  |
| C18C | N6C | Fe02 | 113.0(3)  | F00H | B02R | F003 | 108.3(4)  |
| C20C | N6C | Fe02 | 141.3(4)  | F006 | B02N | F004 | 108.8(4)  |
| C20C | N6C | C18C | 105.7(4)  | F00A | B02N | F004 | 109.8(4)  |
| N1A  | C1A | N2A  | 110.9(4)  | F00A | B02N | F006 | 110.8(4)  |
| N2A  | C2A | C3A  | 105.5(4)  | F00A | B02N | F00L | 109.8(4)  |
| N1A  | C3A | C4A  | 118.3(4)  | F00L | B02N | F004 | 109.1(4)  |
| C2A  | C3A | N1A  | 109.2(4)  | F00L | B02N | F006 | 108.4(4)  |

|      |      |      |          |      |      |      |           |
|------|------|------|----------|------|------|------|-----------|
| C2A  | C3A  | C4A  | 132.2(4) | F008 | B02P | F009 | 108.8(4)  |
| N3A  | C4A  | C3A  | 117.5(4) | F00F | B02P | F008 | 110.7(4)  |
| C6A  | C5A  | N3A  | 118.8(4) | F00F | B02P | F009 | 110.3(4)  |
| C10A | C5A  | N3A  | 121.5(3) | F00F | B02P | F00T | 109.4(5)  |
| C10A | C5A  | C6A  | 119.8(4) | F00T | B02P | F008 | 108.1(5)  |
| C7A  | C6A  | C5A  | 120.3(4) | F00T | B02P | F009 | 109.4(4)  |
| C8A  | C7A  | C6A  | 119.3(4) | F00C | B02Q | F005 | 109.7(4)  |
| C7A  | C8A  | O1A  | 118.7(4) | F00C | B02Q | F00M | 110.0(5)  |
| C7A  | C8A  | C9A  | 121.4(4) | F00C | B02Q | F00P | 111.1(4)  |
| C9A  | C8A  | O1A  | 119.9(4) | F00M | B02Q | F005 | 108.3(4)  |
| C8A  | C9A  | C10A | 119.5(4) | F00M | B02Q | F00P | 109.2(5)  |
| C5A  | C10A | C9A  | 119.8(4) | F00P | B02Q | F005 | 108.5(5)  |
| C12A | C11A | O1A  | 117.3(3) | N4   | C5   | C2   | 177(2)    |
| C12A | C11A | C16A | 120.3(4) | N0AA | C0AA | C2AA | 173.9(17) |
| C16A | C11A | O1A  | 122.4(4) | C20B | N1AA | Fe02 | 141.3(10) |
| C11A | C12A | C13A | 119.4(4) | C20B | N1AA | C7AA | 106.5(14) |
| C14A | C13A | C12A | 120.6(4) | C7AA | N1AA | Fe02 | 112.2(13) |
| C13A | C14A | N4A  | 120.1(3) | N2AA | C5AA | N6B  | 108.0(11) |
| C15A | C14A | N4A  | 120.5(4) | C5AA | N2AA | C6AA | 110.5(12) |
| C15A | C14A | C13A | 119.4(4) | C18B | C6AA | N2AA | 105.0(10) |
| C14A | C15A | C16A | 120.1(4) | C19B | C7AA | C17B | 130.9(14) |
| C11A | C16A | C15A | 120.3(4) | N1AA | C7AA | C17B | 118.0(15) |
| N4A  | C17A | C18A | 117.4(4) | N1AA | C7AA | C19B | 111.0(16) |
| N6A  | C18A | C17A | 117.3(3) | C8C  | C7D  | C6D  | 119.2(4)  |
| C19A | C18A | N6A  | 108.7(4) | C5E  | C6D  | C7D  | 121.0(4)  |
| C19A | C18A | C17A | 134.1(4) |      |      |      |           |

Table 19 Hydrogen Bonds for **3**.

| D    | H    | A                 | d(D-H)/Å | d(H-A)/Å | d(D-A)/Å  | D-H-A/° |
|------|------|-------------------|----------|----------|-----------|---------|
| N2A  | H2A  | F005 <sup>1</sup> | 0.86     | 2.00     | 2.823(5)  | 159.9   |
| N5A  | H5A  | F006 <sup>2</sup> | 0.86     | 2.12     | 2.885(5)  | 147.9   |
| N2B  | H2B  | F004 <sup>3</sup> | 0.86     | 1.99     | 2.826(5)  | 163.5   |
| N5B  | H5B  | F009 <sup>4</sup> | 0.86     | 2.07     | 2.805(13) | 143.6   |
| N2C  | H2C  | F008 <sup>5</sup> | 0.86     | 2.09     | 2.870(5)  | 150.1   |
| N5C  | H5C  | F003 <sup>6</sup> | 0.86     | 1.98     | 2.825(5)  | 166.5   |
| N2AA | H2AB | F009 <sup>4</sup> | 0.86     | 1.94     | 2.788(14) | 166.7   |

<sup>1</sup>1-X,1-Y,2-Z; <sup>2</sup>2-X,1-Y,1-Z; <sup>3</sup>2-X,1-Y,2-Z; <sup>4</sup>1-X,-Y,1-Z; <sup>5</sup>1-X,-Y,2-Z; <sup>6</sup>1-X,1-Y,1-Z

Table 20 Hydrogen Atom Coordinates ( $\text{\AA} \times 10^4$ ) and Isotropic Displacement Parameters ( $\text{\AA}^2 \times 10^3$ ) for **3**.

| Atom | <i>x</i> | <i>y</i> | <i>z</i> | U(eq) |
|------|----------|----------|----------|-------|
| H2A  | 3189     | 3055     | 12133    | 66    |
| H5A  | 10912    | 3280     | 3046     | 60    |
| H2B  | 8726     | 4108     | 11407    | 70    |
| H5B  | 6615     | 1322     | 3312     | 60    |
| H2C  | 6758     | -888     | 11982    | 58    |
| H5C  | 7037     | 6692     | 2815     | 76    |
| H1A  | 4944     | 3079     | 11944    | 59    |
| H2AA | 2642     | 2568     | 11219    | 55    |
| H4A  | 3816     | 1927     | 10041    | 40    |
| H6A  | 6284     | 337      | 9752     | 36    |
| H7A  | 6634     | -358     | 8804     | 40    |
| H9A  | 4965     | 1725     | 7878     | 51    |
| H10A | 4603     | 2425     | 8830     | 46    |
| H12A | 5958     | 44       | 6516     | 40    |
| H13A | 6794     | 937      | 5481     | 41    |
| H15A | 8050     | 2568     | 6435     | 73    |
| H16A | 7197     | 1700     | 7461     | 76    |
| H17A | 9184     | 1453     | 5208     | 41    |
| H19A | 10830    | 1958     | 4035     | 56    |
| H20A | 9454     | 4273     | 3128     | 54    |
| H1B  | 7815     | 2641     | 11630    | 64    |
| H2BA | 8445     | 5260     | 10416    | 62    |
| H4B  | 7176     | 5099     | 9543     | 49    |
| H6B  | 4550     | 4169     | 9652     | 42    |
| H7B  | 3863     | 4690     | 8704     | 43    |
| H9B  | 6588     | 4909     | 7522     | 69    |
| H10B | 7270     | 4393     | 8475     | 63    |
| H12B | 4979     | 3357     | 7386     | 70    |
| H13B | 5531     | 2687     | 6445     | 63    |
| H15B | 5906     | 5425     | 5290     | 45    |
| H16B | 5337     | 6096     | 6234     | 44    |
| H17C | 4952     | 2847     | 5347     | 60    |
| H17B | 4941     | 2792     | 5316     | 60    |
| H19B | 5152     | 1549     | 4189     | 49    |
| H20B | 7994     | 2261     | 3362     | 48    |
| H1C  | 5773     | 577      | 11914    | 49    |
| H2CA | 8030     | -819     | 10974    | 55    |
| H4C  | 8511     | 782      | 9796     | 40    |

|      |       |       |       |    |
|------|-------|-------|-------|----|
| H4AA | 8797  | 2267  | 7537  | 57 |
| H3AA | 7843  | 1507  | 8588  | 47 |
| H9C  | 8193  | 2927  | 7536  | 51 |
| H10C | 7315  | 2068  | 8575  | 48 |
| H12C | 8285  | 4939  | 7120  | 59 |
| H13C | 7572  | 5306  | 6170  | 55 |
| H15C | 9692  | 3694  | 5223  | 38 |
| H16C | 10385 | 3326  | 6183  | 42 |
| H17D | 8102  | 6127  | 4941  | 41 |
| H19C | 7486  | 7285  | 3729  | 60 |
| H20C | 6992  | 4932  | 3046  | 68 |
| H1D  | 8531  | -387  | 7667  | 86 |
| H1E  | 8767  | -1419 | 7472  | 86 |
| H1F  | 7820  | -823  | 7309  | 86 |
| H02A | 9547  | -2218 | 10110 | 50 |
| H02B | 10188 | -1656 | 9425  | 50 |
| H02C | 9637  | -2626 | 9450  | 50 |
| H02D | 11655 | -133  | 5599  | 61 |
| H02E | 12657 | 426   | 5460  | 61 |
| H02F | 12110 | 449   | 4867  | 61 |
| H2D  | 11200 | 1963  | 7718  | 59 |
| H2E  | 10232 | 1821  | 7472  | 59 |
| H2F  | 11101 | 1049  | 7404  | 59 |
| H2AC | 10139 | 509   | 8076  | 57 |
| H2AD | 10519 | 875   | 7294  | 57 |
| H2AE | 11166 | 1030  | 7798  | 57 |
| H5AA | 7375  | 2187  | 3358  | 44 |
| H2AB | 5936  | 1210  | 3595  | 43 |
| H6AA | 4729  | 1538  | 4565  | 43 |
| H7D  | 9918  | 4081  | 8460  | 39 |
| H6D  | 9009  | 3278  | 9497  | 39 |

Table 21 Atomic Occupancy for 3.

| <b>Atom</b> | <b>Occupancy</b> | <b>Atom</b> | <b>Occupancy</b> | <b>Atom</b> | <b>Occupancy</b> |
|-------------|------------------|-------------|------------------|-------------|------------------|
| N5B         | 0.5              | H5B         | 0.5              | N6B         | 0.5              |
| H17C        | 0.5              | H17B        | 0.5              | C18B        | 0.5              |
| C19B        | 0.5              | H19B        | 0.5              | C20B        | 0.5              |
| H20B        | 0.5              | C4AA        | 0.5              | H4AA        | 0.5              |
| C3AA        | 0.5              | H3AA        | 0.5              | C9C         | 0.5              |

|           |           |           |
|-----------|-----------|-----------|
| H9C 0.5   | C10C 0.5  | H10C 0.5  |
| C1 0.5    | H1D 0.5   | H1E 0.5   |
| H1F 0.5   | C1AA 0.5  | N3 0.5    |
| N031 0.5  | C02S 0.5  | H02A 0.5  |
| H02B 0.5  | H02C 0.5  | C02W 0.5  |
| N02Y 0.5  | C02X 0.5  | H02D 0.5  |
| H02E 0.5  | H02F 0.5  | C02Z 0.5  |
| C2 0.25   | H2D 0.25  | H2E 0.25  |
| H2F 0.25  | N4 0.25   | C5 0.25   |
| N0AA 0.25 | C0AA 0.25 | C2AA 0.25 |
| H2AC 0.25 | H2AD 0.25 | H2AE 0.25 |
| N1AA 0.5  | C5AA 0.5  | H5AA 0.5  |
| N2AA 0.5  | H2AB 0.5  | C6AA 0.5  |
| H6AA 0.5  | C7AA 0.5  |           |

## Experimental

Single crystals of  $C_{64}H_{54}B_4F_{16}Fe_2N_{20}O_3$  **3** were crystallised by a Diethyl ether diffusion into acetonitrile. A suitable crystal was selected and [room temperature in paraffin oil]. The crystal was kept at 100 K during data collection. Using Olex2 [1], the structure was solved with the ShelXT [2] structure solution program using Intrinsic Phasing and refined with the ShelXL [3] refinement package using Least Squares minimisation.

1. Dolomanov, O.V., Bourhis, L.J., Gildea, R.J., Howard, J.A.K. & Puschmann, H. (2009), J. Appl. Cryst. 42, 339-341.
2. Sheldrick, G.M. (2015). Acta Cryst. A71, 3-8.
3. Sheldrick, G.M. (2015). Acta Cryst. C71, 3-8.

## Crystal structure determination of [FL204\_a]

**Crystal Data** for  $C_{64}H_{54}B_4F_{16}Fe_2N_{20}O_3$  ( $M = 1610.21$  g/mol): triclinic, space group P-1 (no. 2),  $a = 13.837(3)$  Å,  $b = 13.855(3)$  Å,  $c = 20.684(4)$  Å,  $\alpha = 77.43(3)^\circ$ ,  $\beta = 77.58(3)^\circ$ ,  $\gamma = 86.73(3)^\circ$ ,  $V = 3779.5(15)$  Å<sup>3</sup>,  $Z = 2$ ,  $T = ?$  K,  $\mu(\text{MoK}\alpha) = 0.481$  mm<sup>-1</sup>,  $D_{\text{calc}} = 1.415$  g/cm<sup>3</sup>, 57096 reflections measured ( $2.062^\circ \leq 2\theta \leq 53.998^\circ$ ), 14860 unique ( $R_{\text{int}} = 0.0446$ ,  $R_{\text{sigma}} = 0.0360$ ) which were used in all calculations. The final  $R_1$  was 0.0691 ( $I > 2\sigma(I)$ ) and  $wR_2$  was 0.2111 (all data).

## Refinement model description

Number of restraints - 33, number of constraints - unknown.

## Details:

1. Fixed Uiso  
At 1.2 times of:  
All C(H) groups, All C(H,H) groups, All N(H) groups  
At 1.5 times of:  
All C(H,H,H) groups

## 2. Rigid bond restraints

C5E

with sigma for 1-2 distances of 0.01 and sigma for 1-3 distances of 0.01

## 3. Uiso/Uanis restraints and constraints

Uanis(C7D) = Uanis(C6D)

## 4. Rigid body (RIGU) restrains

N3, C1AA

with sigma for 1-2 distances of 0.004 and sigma for 1-3 distances of 0.004

N031

with sigma for 1-2 distances of 0.004 and sigma for 1-3 distances of 0.004

N02Y

with sigma for 1-2 distances of 0.004 and sigma for 1-3 distances of 0.004

C2AA, C0AA, N0AA

with sigma for 1-2 distances of 0.004 and sigma for 1-3 distances of 0.004

N4, C2, C5

with sigma for 1-2 distances of 0.004 and sigma for 1-3 distances of 0.004

C2, C5, N4

with sigma for 1-2 distances of 0.004 and sigma for 1-3 distances of 0.004

N0AA, C0AA, C2AA

with sigma for 1-2 distances of 0.004 and sigma for 1-3 distances of 0.004

N0AA

with sigma for 1-2 distances of 0.004 and sigma for 1-3 distances of 0.004

C8C, C9C, C4AA, C3AA, C10C, C5E

with sigma for 1-2 distances of 0.004 and sigma for 1-3 distances of 0.004

C5E

with sigma for 1-2 distances of 0.004 and sigma for 1-3 distances of 0.004

## 5. Others

Fixed Sof: N5B(0.5) H5B(0.5) N6B(0.5) H17C(0.5) H17B(0.5) C18B(0.5)

C19B(0.5)

H19B(0.5) C20B(0.5) H20B(0.5) C4AA(0.5) H4AA(0.5) C3AA(0.5) H3AA(0.5)

C9C(0.5)

H9C(0.5) C10C(0.5) H10C(0.5) C1(0.5) H1D(0.5) H1E(0.5) H1F(0.5) C1AA(0.5)

N3(0.5) N031(0.5) C02S(0.5) H02A(0.5) H02B(0.5) H02C(0.5) C02W(0.5)

N02Y(0.5)

C02X(0.5) H02D(0.5) H02E(0.5) H02F(0.5) C02Z(0.5) C2(0.25) H2D(0.25)

H2E(0.25)

H2F(0.25) N4(0.25) C5(0.25) N0AA(0.25) C0AA(0.25) C2AA(0.25) H2AC(0.25)

H2AD(0.25) H2AE(0.25) N1AA(0.5) C5AA(0.5) H5AA(0.5) N2AA(0.5) H2AB(0.5)

C6AA(0.5) H6AA(0.5) C7AA(0.5)

## 6.a Aromatic/amide H refined with riding coordinates:

N2A(H2A), N5A(H5A), N2B(H2B), N5B(H5B), N2C(H2C), N5C(H5C), C1A(H1A),

C2A(H2AA), C4A(H4A), C6A(H6A), C7A(H7A), C9A(H9A), C10A(H10A), C12A(H12A),

C13A(H13A), C15A(H15A), C16A(H16A), C17A(H17A), C19A(H19A), C20A(H20A),

C1B(H1B), C2B(H2BA), C4B(H4B), C6B(H6B), C7B(H7B), C9B(H9B), C10B(H10B),

C12B(H12B), C13B(H13B), C15B(H15B), C16B(H16B), C17B(H17C), C17B(H17B),

C19B(H19B), C20B(H20B), C1C(H1C), C2C(H2CA), C4C(H4C), C4AA(H4AA),

C3AA(H3AA),

C9C(H9C), C10C(H10C), C12C(H12C), C13C(H13C), C15C(H15C), C16C(H16C),

C17C(H17D), C19C(H19C), C20C(H20C), C5AA(H5AA), N2AA(H2AB), C6AA(H6AA),

C7D(H7D), C6D(H6D)

## 6.b Idealised Me refined as rotating group:

C1(H1D,H1E,H1F), C02S(H02A,H02B,H02C), C02X(H02D,H02E,H02F),

C2(H2D,H2E,H2F),

C2AA(H2AC,H2AD,H2AE)

**Magnetic susceptibility:**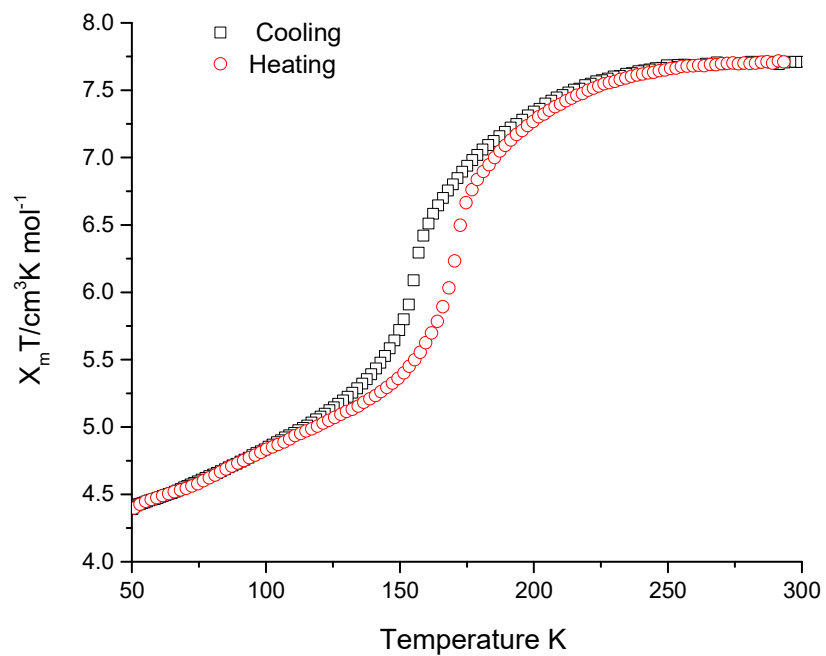

**Figure S19.** Cooling and heating modes of **1**, cycling from 300-50-300 K, show a thermal hysteresis of 15 K.

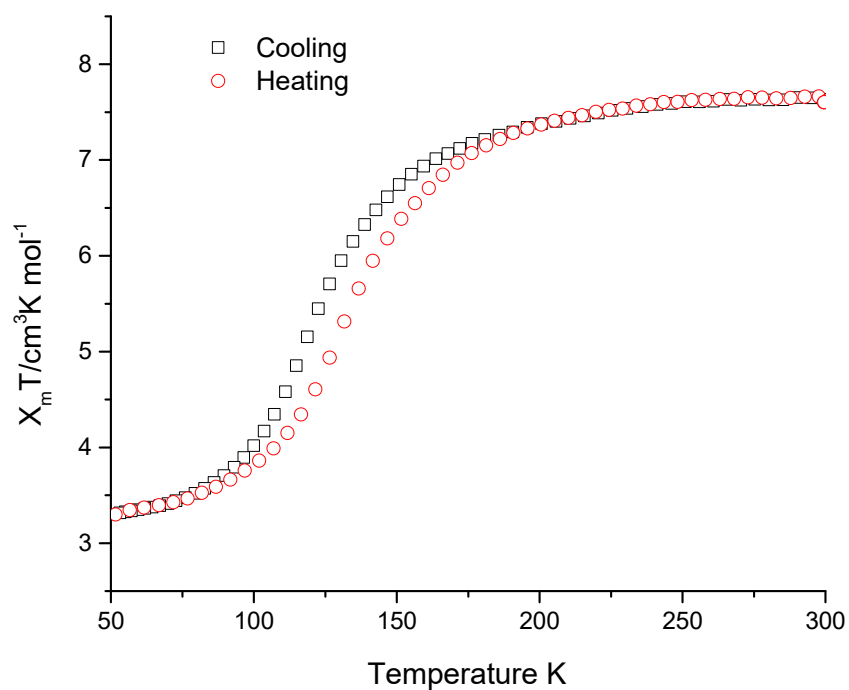

**Figure S20.** Cooling and heating modes of **2**, cycling from 300-50-300 K, showing a Thermal hysteresis of 15 K.



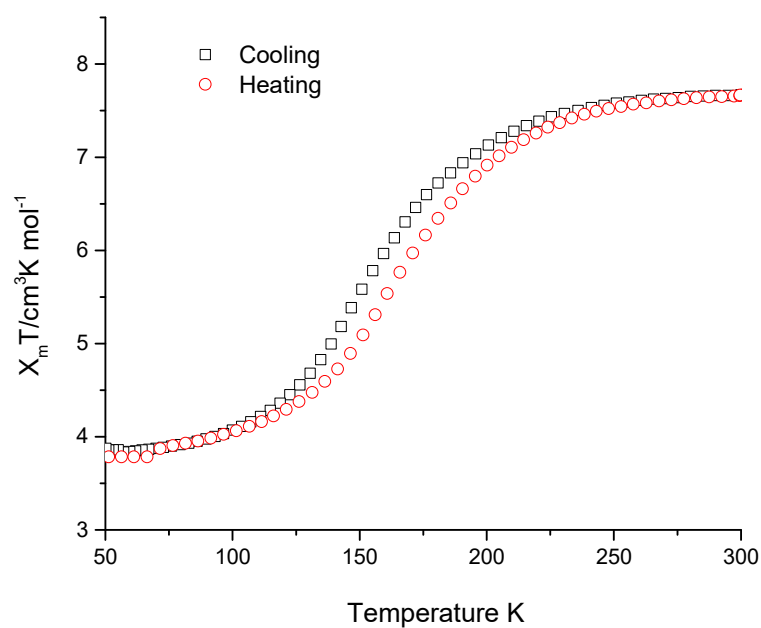

**Figure S21.** Cooling and heating modes of **3**, cycling from 300-50-300 K, with a thermal hysteresis of 15 K.
